# Supplementary material for: Catalytic intermolecular allyl–allyl cross-couplings between alcohols and boronates
Source: Royal Society of Chemistry journal article supplement (doi:10.1039/c1cc13348a), 2011-01-01

# Catalytic Intermolecular Allyl–Allyl Cross-Couplings between Alcohols and Boronates

Agustín Jiménez-Aquino, Emmanuel Ferrer Flegeau, Uwe Schneider, and  
Shū Kobayashi\*

*Department of Chemistry, School of Science, The University of Tokyo,  
Hongo, Bunkyo-ku, Tokyo 113-0033, Japan*

## General and Additional Information

| Table of Contents                                                                                                                           | Page |
|---------------------------------------------------------------------------------------------------------------------------------------------|------|
| 1 General Experimental                                                                                                                      | S–2  |
| 2 General Procedure for Catalytic Intermolecular Allyl–Allyl Cross-Couplings                                                                | S–2  |
| 3 Analytical Data for Unknown Compounds                                                                                                     | S–3  |
| 3.1 <i>Linear</i> 1,5-Dienes <b>3a–n</b> and <i>Branched</i> 1,5-Diene <b>4j</b>                                                            | S–3  |
| 3.2 <i>Linear</i> Vinyl Silanes <b>7</b> and <b>8</b>                                                                                       | S–10 |
| 4 References                                                                                                                                | S–11 |
| 5 Copies of <sup>1</sup> H, <sup>13</sup> C, and <sup>19</sup> F NMR Spectra for Products <b>3a–n</b> , <b>4j</b> , <b>7</b> , and <b>8</b> | S–12 |

## 1 General Experimental

Nuclear Magnetic Resonance (NMR) spectra were recorded on a JEOL ECX-600 spectrometer operating at 600 MHz for  $^1\text{H}$  NMR, 150 MHz for  $^{13}\text{C}$  NMR, and 565 MHz for  $^{19}\text{F}$  NMR. Chemical shifts were reported downfield from tetramethyl silane (TMS). Infra Red (IR) spectra were measured using a JASCO FT / IR-610 spectrometer. High Resolution Mass Spectra (HRMS) were recorded using a BRUKER DALTONICS BioTOF II (ESI), a JEOL JMS-T100TD (DART), or a KRATOS ANALYTICAL AXIMA-CFR<sup>+</sup>A (MALDI-TOF) spectrometer. Preparative thin-layer Chromatography (PTLC) was carried out using Wakogel B-5F from WAKO. Toluene and hexane were freshly distilled from sodium(0) / benzophenone; acetonitrile was distilled from calcium hydride. All solvents were then stored over activated molecular sieves (4 Å) in an argon box. The primary allyl alcohols **1a**,<sup>1</sup> **1c**,<sup>2</sup> and **1j**<sup>3</sup> are literature-known and were prepared accordingly. The secondary allyl alcohols **5a**,<sup>4</sup> **5b**,<sup>5</sup> **5d**,<sup>6</sup> **5e**,<sup>7</sup> **5f**,<sup>8</sup> **5g**,<sup>9</sup> **5h**,<sup>10</sup> **5i**,<sup>11</sup> **5k**,<sup>12</sup> **5l**,<sup>13</sup> **5m**,<sup>14</sup> and **5n**<sup>15</sup> are literature-known and were prepared accordingly. Allyl boronates **2a**<sup>16</sup> and **6**<sup>17</sup> were prepared by slightly modified procedures of reported methods. Tetrakis(triphenylphosphine)nickel(0) was purchased from ALDRICH and stored in an argon box at  $-30\text{ }^\circ\text{C}$ .

## 2 General Procedure for Catalytic Intermolecular Allyl-Allyl Cross-Couplings

To a flame-dried 5 mL-microwave-type vial with magnetic stirring bar in an argon box were added tetrakis(triphenylphosphine)nickel(0) (0.01–0.02 mmol; 5–10 mol%), the indicated solvent (2 mL; 0.1 M with respect to allyl alcohol substrate; *cf. chapters 3.1 and 3.2*), and the corresponding primary or secondary allyl alcohol **1** or **5** (0.20 mmol, 1.0 equiv). After drop-wise addition of the corresponding allyl boronate **2a** or **6** (0.24 mmol; 1.2 equiv) *outside of the argon box*, the reaction mixture in the septum-sealed vial was stirred at the indicated temperature until complete conversion of the starting allyl alcohol [thin-layer chromatography (TLC), silica gel]. The crude reaction mixture was sequentially diluted with diethyl ether (6 mL), stirred at open air for 15 min, and filtered through a pad of silica gel. The filtrate was concentrated *in vacuo*, and the residue was purified by preparative thin-layer chromatography (PTLC; eluant: hexane / ethyl acetate) to afford the cross-coupled products **3a–n** and **4j** or **7** and **8**.

### 3 Analytical Data for Unknown Compounds

#### 3.1 Linear 1,5-Dienes **3a–n** and Branched 1,5-Diene **4j**

Analytical data are provided for all unknown 1,5-dienes.

##### 1-[(*E*)-Hexa-1,5-dienyl]benzene (**3a**)<sup>3</sup>

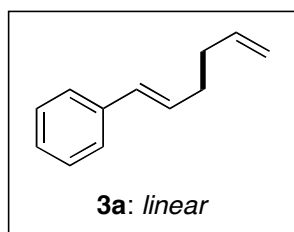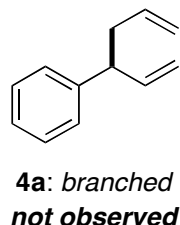

Prepared from the primary or secondary allyl alcohol **1a** or **5a** and allyl boronate **2a** according to the general procedure (*cf.* chapter 2); catalyst loading: 10 mol% or 5 mol%; solvent: toluene or acetonitrile; temperature: 25 °C; time: 12 h or 16 h. The obtained analytical data of **3a** thus prepared fit accurately with the reported data.<sup>3</sup>

Colorless liquid.

**Yield**: 94% or 85% (ratio **3a:4a** = >99:1).

##### 2-[(*E*)-Hexa-1,5-dienyl]naphthalene (**3b**)

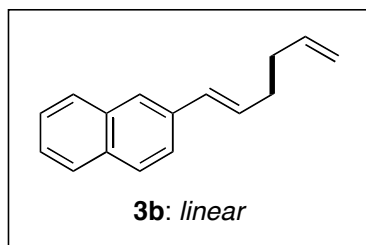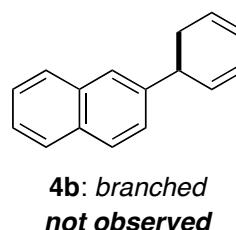

Prepared from the primary allyl alcohol **1b** and allyl boronate **2a** according to the general procedure (*cf.* chapter 2); catalyst loading: 5 mol%; solvent: acetonitrile; temperature: 25 °C; time: 26 h.

Pale yellow liquid.

**Yield**: 75% (ratio **3b:4b** = >99:1).

**<sup>1</sup>H NMR** (CDCl<sub>3</sub>, 600 MHz):  $\delta$  = 2.28–2.41 (m, 4H), 5.04–5.13 (m, 2H), 5.89–5.95 (m, 1H), 6.38 (dt,  $J$  = 6.8, 15.6 Hz, 1H), 6.58 (d,  $J$  = 15.6 Hz, 1H), 7.41–7.47 (m, 2H); 7.59–7.60 (m, 1H), 7.69 (s, 1H); 7.77–7.81 (m, 3H) ppm.

**<sup>13</sup>C NMR** (CDCl<sub>3</sub>, 150 MHz):  $\delta$  = 32.6, 33.6, 115.1, 123.6, 125.5, 126.2, 127.7, 127.9, 128.1, 130.4, 130.6, 132.8, 133.8, 135.3, 138.2 ppm.

**IR** (film):  $\nu$  = 3056, 2923, 1638, 1440, 963, 911, 858, 809, 744 cm<sup>-1</sup>.

**HRMS** (ESI): calculated for C<sub>16</sub>H<sub>16</sub><sup>+</sup> = [M]<sup>+</sup>:  $m/z$  = 208.1252; mass spectroscopic analyses (DART, ESI, MALDI) failed to give the desired molecular signal, resulting in fragmentation.

### 1-[(*E*)-Hexa-1,5-dienyl]-4-methoxybenzene (**3c**)<sup>3</sup>

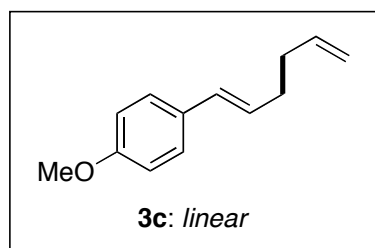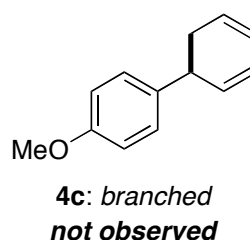

Prepared from the primary allyl alcohol **1c** and allyl boronate **2a** according to the general procedure (*cf.* chapter 2); catalyst loading: 10 mol%; solvent: toluene; temperature: 30 °C; time: 14 h. *The obtained analytical data of 3c thus prepared fit accurately with the reported data.*<sup>3</sup>

Colorless liquid.

**Yield**: 89% (ratio **3c:4c** = >99:1).

### 4-[(*E*)-Hexa-1,5-dienyl]-*N,N*-dimethylbenzenamine (**3d**)

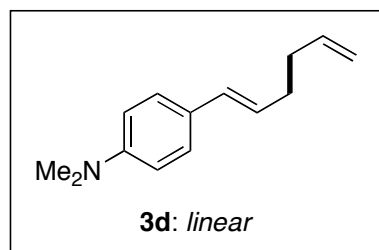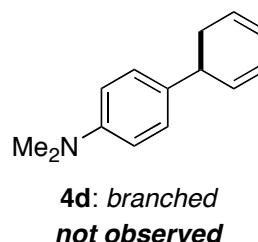

Prepared from the secondary allyl alcohol **5d** and allyl boronate **2a** according to the general procedure (*cf.* chapter 2); catalyst loading: 5 mol%; solvent: acetonitrile; temperature: 25 °C; time: 26 h.

Orange-red liquid.

**Yield**: 86% (ratio **3d:4d** = >99:1).

**<sup>1</sup>H NMR** (CDCl<sub>3</sub>, 600 MHz):  $\delta$  = 2.26–2.38 (m, 4H), 2.98 (s, 6H), 5.04–5.14 (m, 2H), 5.90–5.97 (m, 1H), 6.08 (dt,  $J$  = 6.7, 15.8 Hz, 1H), 6.37–6.40 (m, 1H), 6.73 (d,  $J$  = 8.8 Hz, 2H), 7.29 (d,  $J$  = 8.8 Hz, 2H) ppm.

**<sup>13</sup>C NMR** (CDCl<sub>3</sub>, 150 MHz):  $\delta$  = 32.7, 34.1, 40.8, 112.8, 114.9, 126.0, 126.7, 127.0, 130.1, 138.6, 149.9 ppm.

**IR** (film):  $\nu$  = 2977, 2919, 2844, 1610, 1522, 1444, 1351, 1165, 963, 911, 802 cm<sup>-1</sup>.

**HRMS** (ESI): calculated for C<sub>14</sub>H<sub>19</sub>N<sup>+</sup> = [M]<sup>+</sup>:  $m/z$  = 201.1517; *mass spectroscopic analyses (DART, ESI, MALDI) failed to give the desired molecular signal, resulting in fragmentation.*

#### 4-[(*E*)-Hexa-1,5-dienyl]benzonitrile (**3e**)<sup>3</sup>

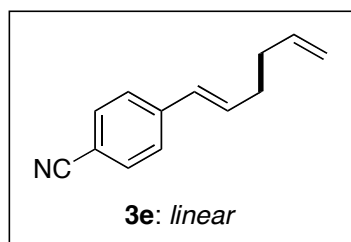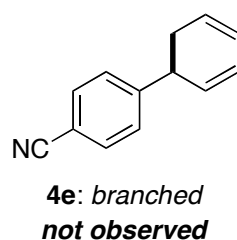

Prepared from the secondary allyl alcohol **5e** and allyl boronate **2a** according to the general procedure (*cf.* chapter 2); catalyst loading: 10 mol%; solvent: acetonitrile; temperature: 25 °C; time: 12 h. *The obtained analytical data of 3e thus prepared fit accurately with the reported data.*<sup>3</sup>

Colorless liquid.

**Yield**: 87% (ratio **3e:4e** = >99:1).

#### 1-fluoro-[(*E*)-Hexa-1,5-dienyl]benzene (**3f**)

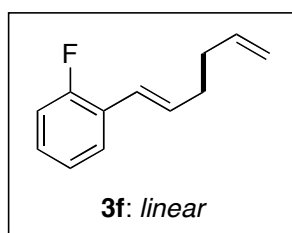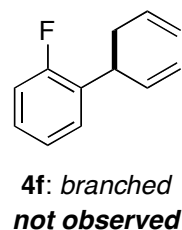

Prepared from the secondary allyl alcohol **5f** and allyl boronate **2a** according to the general procedure (*cf.* chapter 2); catalyst loading: 10 mol%; solvent: hexane; temperature: 40 °C; time: 19 h.

Colorless liquid.

**Yield**: 86% (ratio **3f:4f** = >99:1).

**<sup>1</sup>H NMR** (CDCl<sub>3</sub>, 600 MHz):  $\delta$  = 2.24–2.35 (m, 4H), 5.00–5.09 (m, 2H), 5.92 (ddt,  $J$  = 6.5, 10.2, 16.8 Hz, 1H), 6.31 (dt,  $J$  = 6.9, 16.0 Hz, 1H), 6.55–6.58 (m, 1H), 6.99–7.18 (m, 3H), 7.42 (td,  $J$  = 1.8, 7.7 Hz, 1H) ppm.

**<sup>13</sup>C NMR** (CDCl<sub>3</sub>, 150 MHz):  $\delta$  = 32.9, 33.5, 115.1, 115.7 (d,  $J$  = 22.3 Hz), 122.6 (d,  $J$  = 3.6 Hz), 124.0 (d,  $J$  = 3.6 Hz), 125.5 (d,  $J$  = 12.4 Hz), 127.1 (d,  $J$  = 4.1 Hz), 128.1 (d,  $J$  = 8.3 Hz), 132.9 (d,  $J$  = 4.4 Hz), 138.1, 160.0 (d,  $J$  = 248.4 Hz) ppm.

**<sup>19</sup>F NMR** (CDCl<sub>3</sub>, 565 MHz):  $\delta$  = –118.8 ppm.

**IR** (film):  $\nu$  = 3077, 3041, 3001, 2979, 2925, 2846, 1642, 1577, 1488, 1452, 1229, 1199, 970, 913, 753 cm<sup>–1</sup>.

**HRMS** (ESI): calculated for C<sub>12</sub>H<sub>13</sub>F<sup>+</sup> = [M]<sup>+</sup>:  $m/z$  = 176.1001; *mass spectroscopic analyses (DART, ESI, MALDI) failed to give the desired molecular signal, resulting in fragmentation.*

## 2-[(*E*)-Hexa-1,5-dienyl]furan (**3g**)

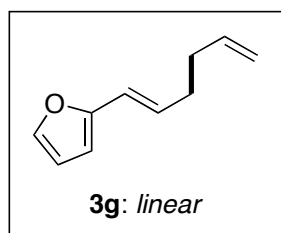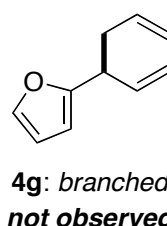

Prepared from the secondary allyl alcohol **5g** and allyl boronate **2a** according to the general procedure (*cf.* chapter 2); catalyst loading: 10 mol%; solvent: toluene; temperature: 25 °C; time: 24 h.

Pale yellow liquid.

**Yield**: 89% (ratio **3g:4g** = >99:1).

**<sup>1</sup>H NMR** (CDCl<sub>3</sub>, 600 MHz):  $\delta$  = 2.20–2.29 (m, 4H), 4.98–5.07 (m, 2H), 5.85 (ddt,  $J$  = 6.5, 10.1, 16.8 Hz, 1H), 6.12–6.23 (m, 3H), 6.33–6.34 (m, 1H), 7.29 (d,  $J$  = 1.7 Hz, 1H) ppm.

**<sup>13</sup>C NMR** (CDCl<sub>3</sub>, 150 MHz):  $\delta$  = 32.3, 33.5, 106.2, 111.2, 115.1, 119.0, 129.2, 138.1, 141.4, 153.3 ppm.

**IR** (film):  $\nu$  = 3078, 2978, 2924, 2845, 1641, 1491, 1442, 1254, 1150, 1011, 960, 915, 792, 732 cm<sup>-1</sup>.

**HRMS** (ESI): calculated for C<sub>10</sub>H<sub>12</sub>O<sup>+</sup> = [M]<sup>+</sup>:  $m/z$  = 148.0888; *mass spectroscopic analyses (DART, ESI, MALDI) failed to give the desired molecular signal, resulting in fragmentation.*

## 2-[(*E*)-Hexa-1,5-dienyl]thiophene (**3h**)<sup>3</sup>

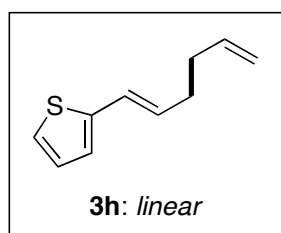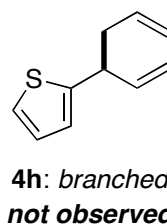

Prepared from the secondary allyl alcohol **5h** and allyl boronate **2a** according to the general procedure (*cf.* chapter 2); catalyst loading: 10 mol%; solvent: toluene; temperature: 25 °C; time: 14 h. *The obtained analytical data of **3h** thus prepared fit accurately with the reported data.*<sup>3</sup>

Pale yellow liquid.

**Yield**: 88% (ratio **3h:4h** = >99:1).

### 3-[(*E*)-Hexa-1,5-dienyl]pyridine (**3i**)<sup>3</sup>

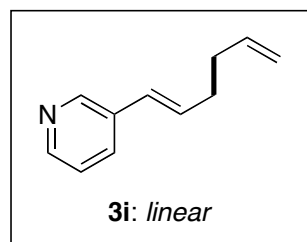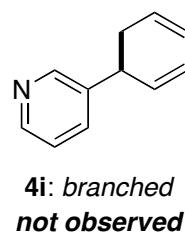

Prepared from the secondary allyl alcohol **5i** and allyl boronate **2a** according to the general procedure (*cf.* chapter 2); *catalyst loading*: 10 mol%; *solvent*: toluene; *temperature*: 25 °C; *time*: 24 h. *The obtained analytical data of 3i thus prepared fit accurately with the reported data.*<sup>3</sup>

Pale yellow liquid.

**Yield**: 91% (ratio **3i:4i** = >99:1).

### 1-[(*E*)-Octa-3,7-dienyl]benzene (**3j**)<sup>3</sup>

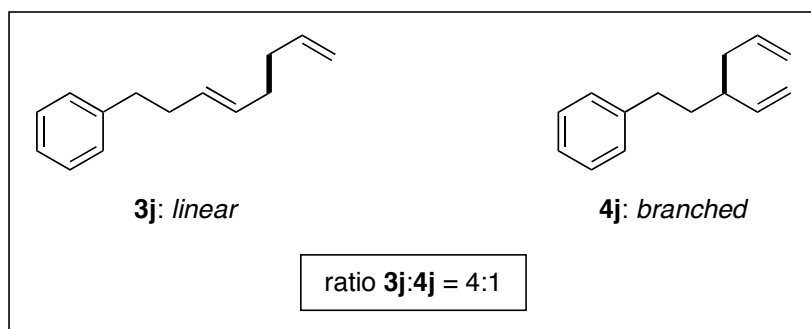

Prepared from the primary allyl alcohol **1j** and allyl boronate **2a** according to the general procedure (*cf.* chapter 2); *catalyst loading*: 10 mol%; *solvent*: hexane; *temperature*: 40 °C; *time*: 36 h. *The obtained analytical data of 3j and 4j thus prepared fit accurately with the reported data.*<sup>3</sup>

Colorless liquid.

**Yield**: 78% (ratio **3j:4j** = 4:1).

### 1-[(*E*)-2-Methylhexa-1,5-dienyl]benzene (**3k**)<sup>3</sup>

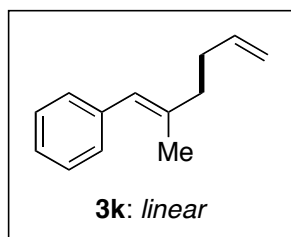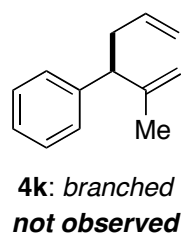

Prepared from the secondary allyl alcohol **5k** and allyl boronate **2a** according to the general procedure (*cf.* chapter 2); catalyst loading: 10 mol%; solvent: acetonitrile; temperature: 40 °C; time: 36 h. The obtained analytical data of **3k** thus prepared fit accurately with the reported data.<sup>3</sup>

Yellow liquid.

**Yield**: 86% (ratio **3k:4k** = >99:1).

### 1-(Trifluoromethyl)-4-[(*E*)-2-methylhexa-1,5-dienyl]benzene (**3l**)<sup>3</sup>

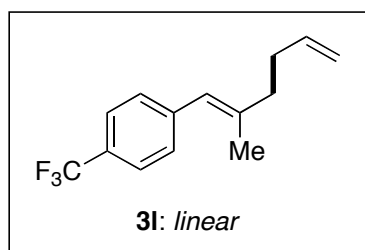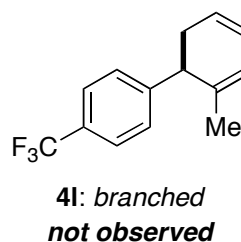

Prepared from the secondary allyl alcohol **5l** and allyl boronate **2a** according to the general procedure (*cf.* chapter 2); catalyst loading: 10 mol%; solvent: acetonitrile; temperature: 25 °C; time: 24 h. The obtained analytical data of **3l** thus prepared fit accurately with the reported data.<sup>3</sup>

Yellow liquid.

**Yield**: 87% (ratio **3l:4l** = >99:1).



**(E)-1,3-Diphenylhexa-1,5-diene (3m)<sup>3</sup>**

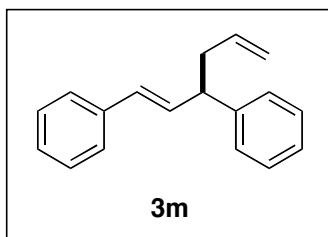

Prepared from the secondary allyl alcohol **5m** and allyl boronate **2a** according to the general procedure (*cf.* chapter 2); catalyst loading: 10 mol%; solvent: toluene; temperature: 60 °C; time: 36 h. *The obtained analytical data of 7 and 8 thus prepared fit accurately with the reported data.*<sup>3</sup>

Pale yellow liquid.

**Yield**: 83%.

**1,1-Diphenylhexa-1,5-diene (3n)**

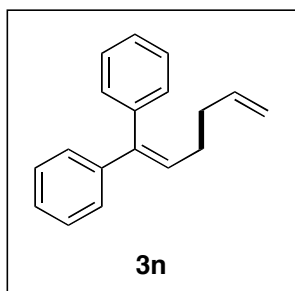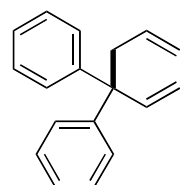

**4n: branched  
not observed**

Prepared from the secondary allyl alcohol **5n** and allyl boronate **2a** according to the general procedure (*cf.* chapter 2); catalyst loading: 10 mol%; solvent: MeCN; temperature: 60 °C; time: 36 h.

Pale yellow liquid.

**Yield**: 79% (ratio **3n:4n** = >99:1).

**<sup>1</sup>H NMR** (CDCl<sub>3</sub>, 600 MHz):  $\delta$  = 2.23–2.29 (m, 4H), 5.00–5.07 (m, 2H), 5.80–5.86 (m, 1H), 6.12 (t,  $J$  = 7 Hz, 1H), 7.21–7.47 (m, 10H) ppm.

**<sup>13</sup>C NMR** (CDCl<sub>3</sub>, 150 MHz):  $\delta$  = 29.3, 34.2, 115.1, 127.0, 127.1, 127.4, 128.2, 128.3, 129.3, 130.0, 138.2, 140.3, 142.1, 142.9 ppm.

**IR** (film):  $\nu$  = 3058, 3024, 2919, 1493, 1442, 994, 913, 762, 698 cm<sup>-1</sup>.

**HRMS** (ESI): calculated for C<sub>18</sub>H<sub>18</sub><sup>+</sup> = [M]<sup>+</sup>:  $m/z$  = 234.1409; *mass spectroscopic analyses (DART, ESI, MALDI) failed to give the desired molecular signal, resulting in fragmentation.*

### 3.2 Linear Vinyl Silanes **7** and **8**

Trimethyl-[(1*E*,5*E*)-6-phenylhexa-1,5-dienyl]silane (**7**)<sup>3</sup>

Trimethyl-[(*E*)-6-phenylhexa-1,5-dien-3-yl]silane (**8**)<sup>3</sup>

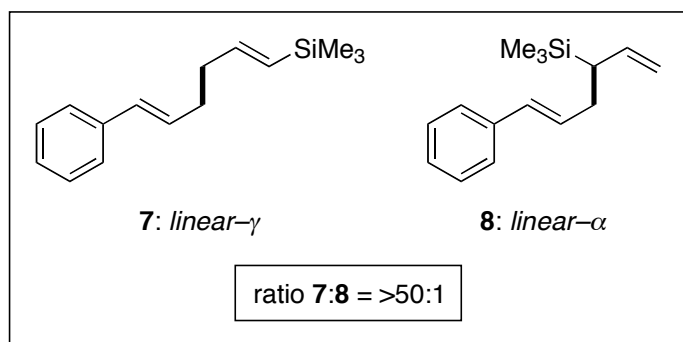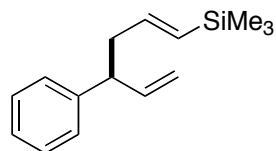

*branched- $\gamma$*   
**not observed**

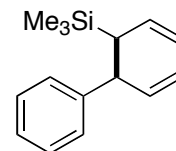

*branched- $\alpha$*   
**not observed**

Prepared from the primary allyl alcohol **1a** and  $\alpha$ -silylallyl boronate **6** according to the general procedure (*cf.* chapter 2); catalyst loading: 10 mol%; solvent: hexane; temperature: 30 °C; time: 24 h. *The obtained analytical data of 7 and 8 thus prepared fit accurately with the reported data.*<sup>3</sup>

Pale yellow liquid.

**Yield**: 88% (ratio **7:8** = >50:1).

## 4 References

- 
- <sup>1</sup> Lacasse, M.-C.; Poulard, C.; Charette, A. B. *J. Am. Chem. Soc.* **2005**, *127*, 12440.
- <sup>2</sup> Schepp, N. P.; Shukla, D.; Johnston, L. J.; Sarker, H.; Bauld, N. L. *J. Am. Chem. Soc.* **1997**, *119*, 10325.
- <sup>3</sup> Ferrer Flegeau, E.; Schneider, U.; Kobayashi, S. *Chem. Eur. J.* **2009**, *15*, 12247 and references cited herein.
- <sup>4</sup> Jung, W. K.; Takeshi, K.; Miyuki, K.; Kazuya, Y.; Noritaka, M. *Chem. Eur. J.* **2008**, *14*, 4104.
- <sup>5</sup> Maytum, H. C. *Chem. Asian J.* **2010**, *5*, 538.
- <sup>6</sup> Briot, A.; Baehr, C.; Brouillard, R.; Wagner, A.; Mioskowski, C. *J. Org. Chem.* **2004**, *69*, 1374.
- <sup>7</sup> Fuchter, M. J.; Levy J. N. *Org. Lett.* **2008**, *10*, 4919.
- <sup>8</sup> Bunce, R. A.; Nago, T. *J. Heterocyclic Chem.* **2009**, *46*, 623.
- <sup>9</sup> Surendra, K.; Krishnaveni, N. S.; Rao, K. R. *Tetrahedron Lett.* **2006**, *47*, 2133.
- <sup>10</sup> Morrill, C.; Beutner, G. L.; Grubbs, R. H. *J. Org. Chem.* **2006**, *71*, 7813.
- <sup>11</sup> Zhang, G.; Kumamoto T.; Heima T.; Ishikawa T. *Tetrahedron Lett.* **2010**, *51*, 3927.
- <sup>12</sup> Miura, K.; Wang, D.; Hosomi A. *J. Am. Chem. Soc.* **2005**, *127*, 9366.
- <sup>13</sup> Mizuno, A.; Kusama, H.; Iwasawa, N. *Chem. Eur. J.* **2010**, *16*, 8248.
- <sup>14</sup> Kumari, P.; Poonam, S. M. S. *Chem. Commun.* **2009**, 6397.
- <sup>15</sup> Hatano, M.; Shinji S.; Ishihara, K. *J. Am. Chem. Soc.* **2006**, *128*, 9998.
- <sup>16</sup> Roush, W. R.; Adam, M. A.; Walts, A. E.; Harris, D. J. *J. Am. Chem. Soc.* **1986**, *108*, 3422.
- <sup>17</sup> Tsai, D. J. S.; Matteson, D. S. *Organometallics* **1983**, *2*, 236.

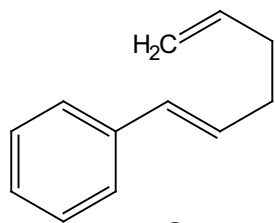

**3a**

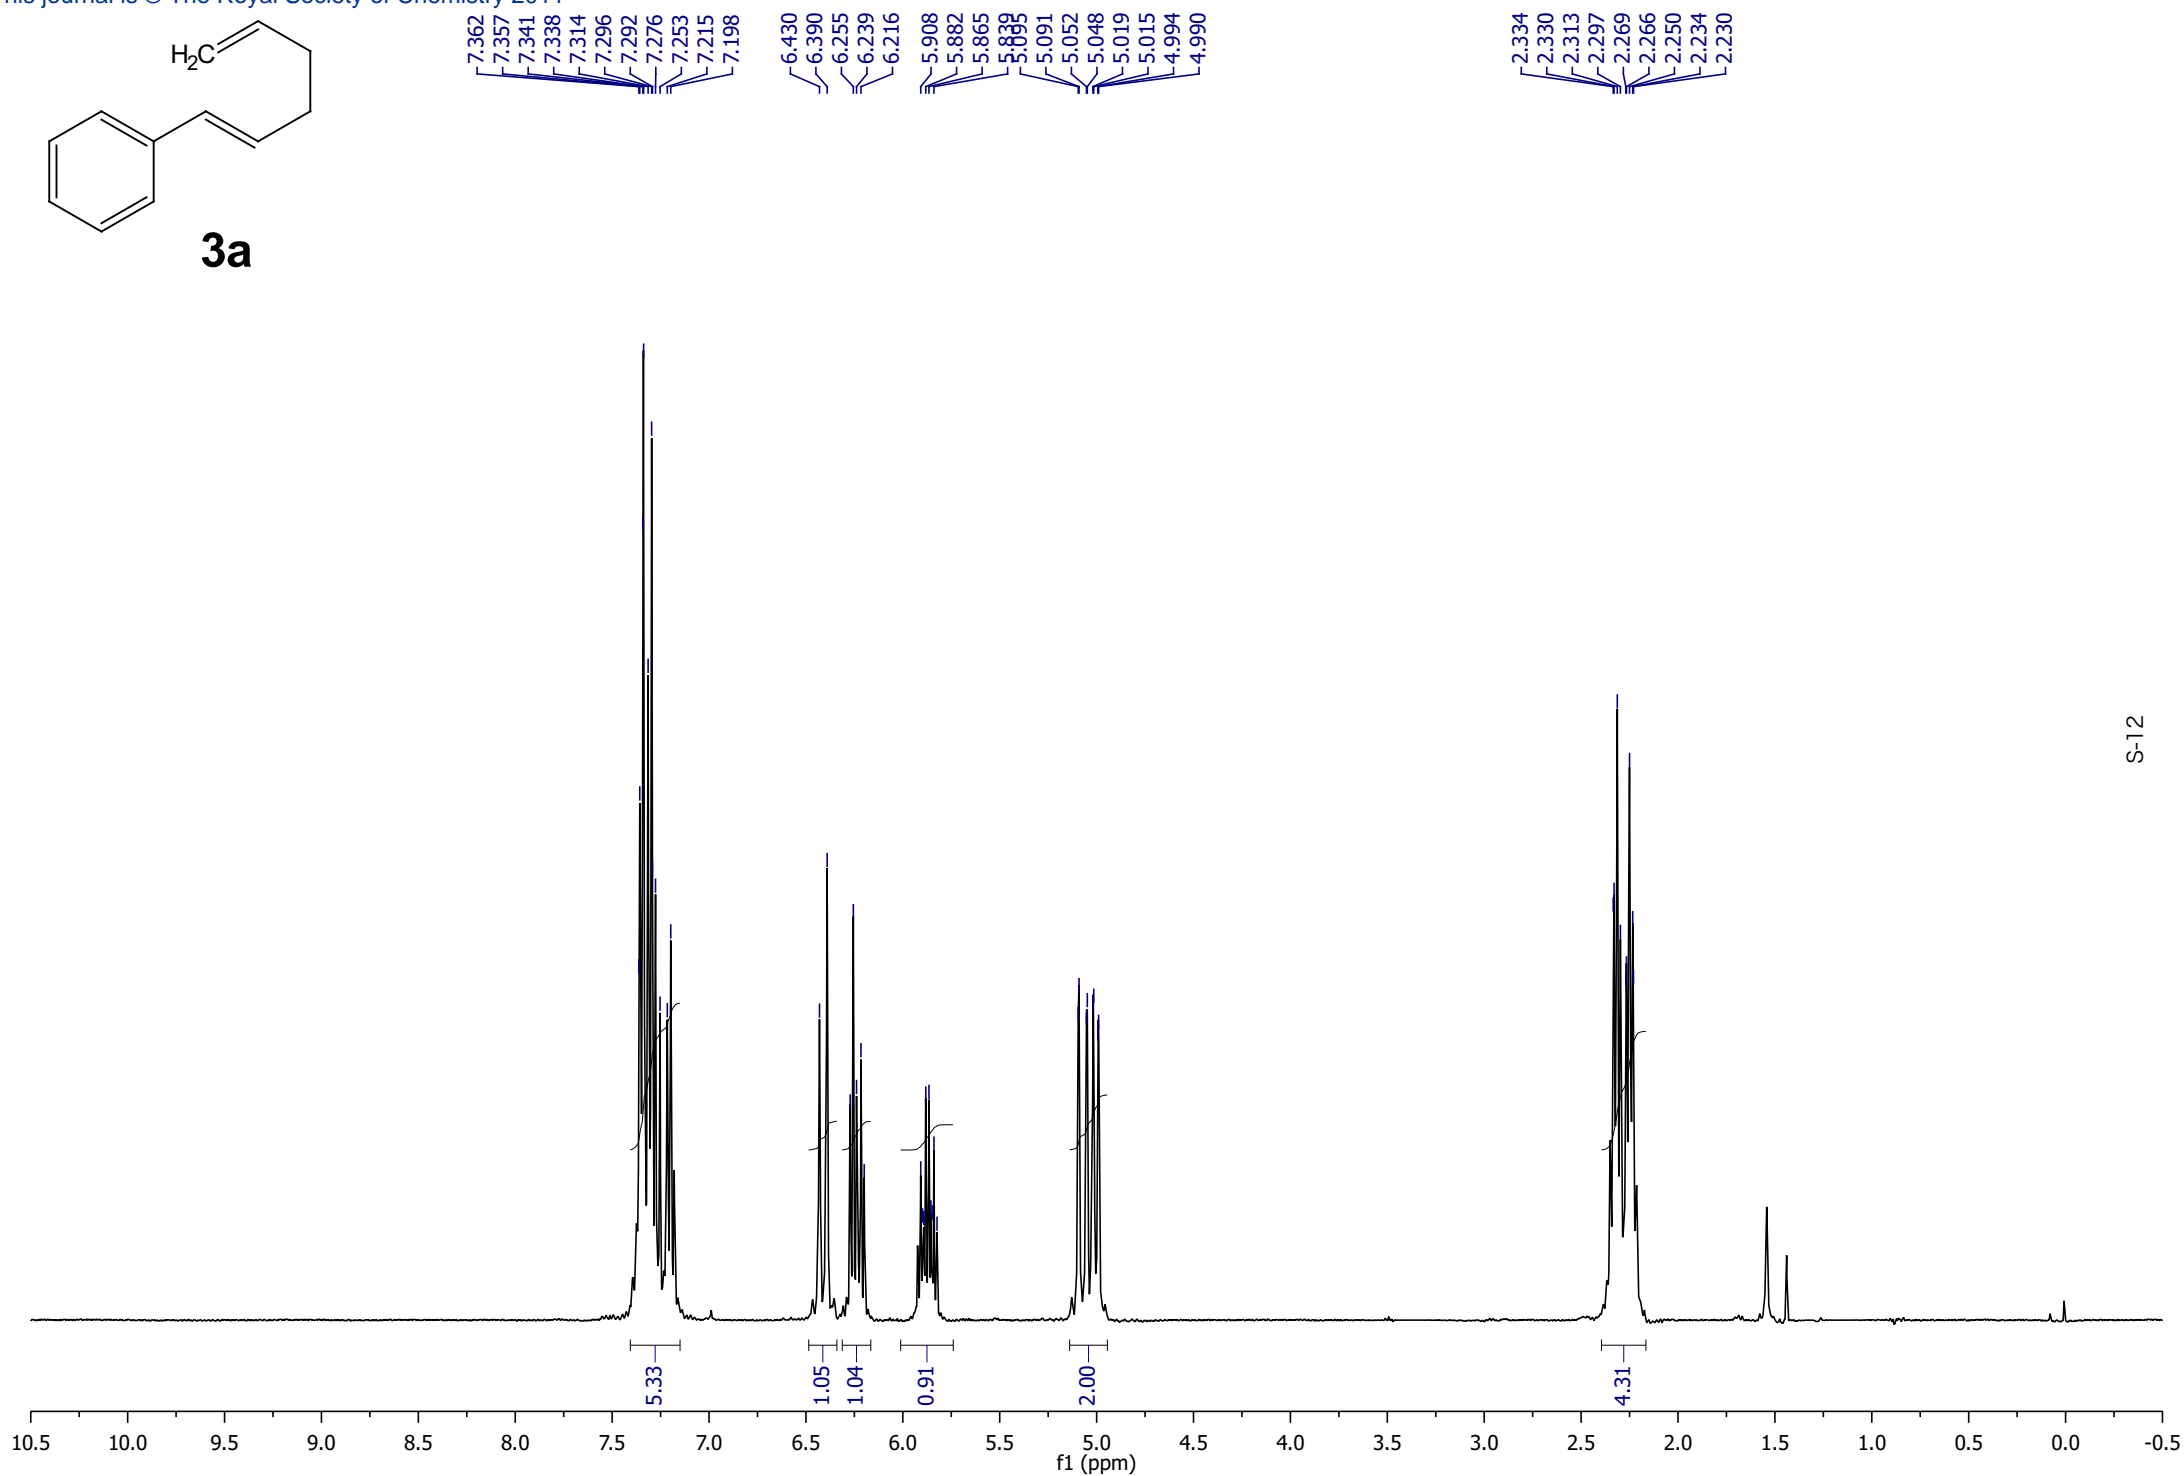

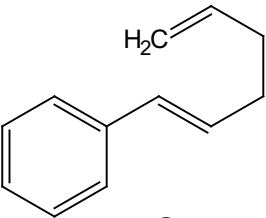

**3a**

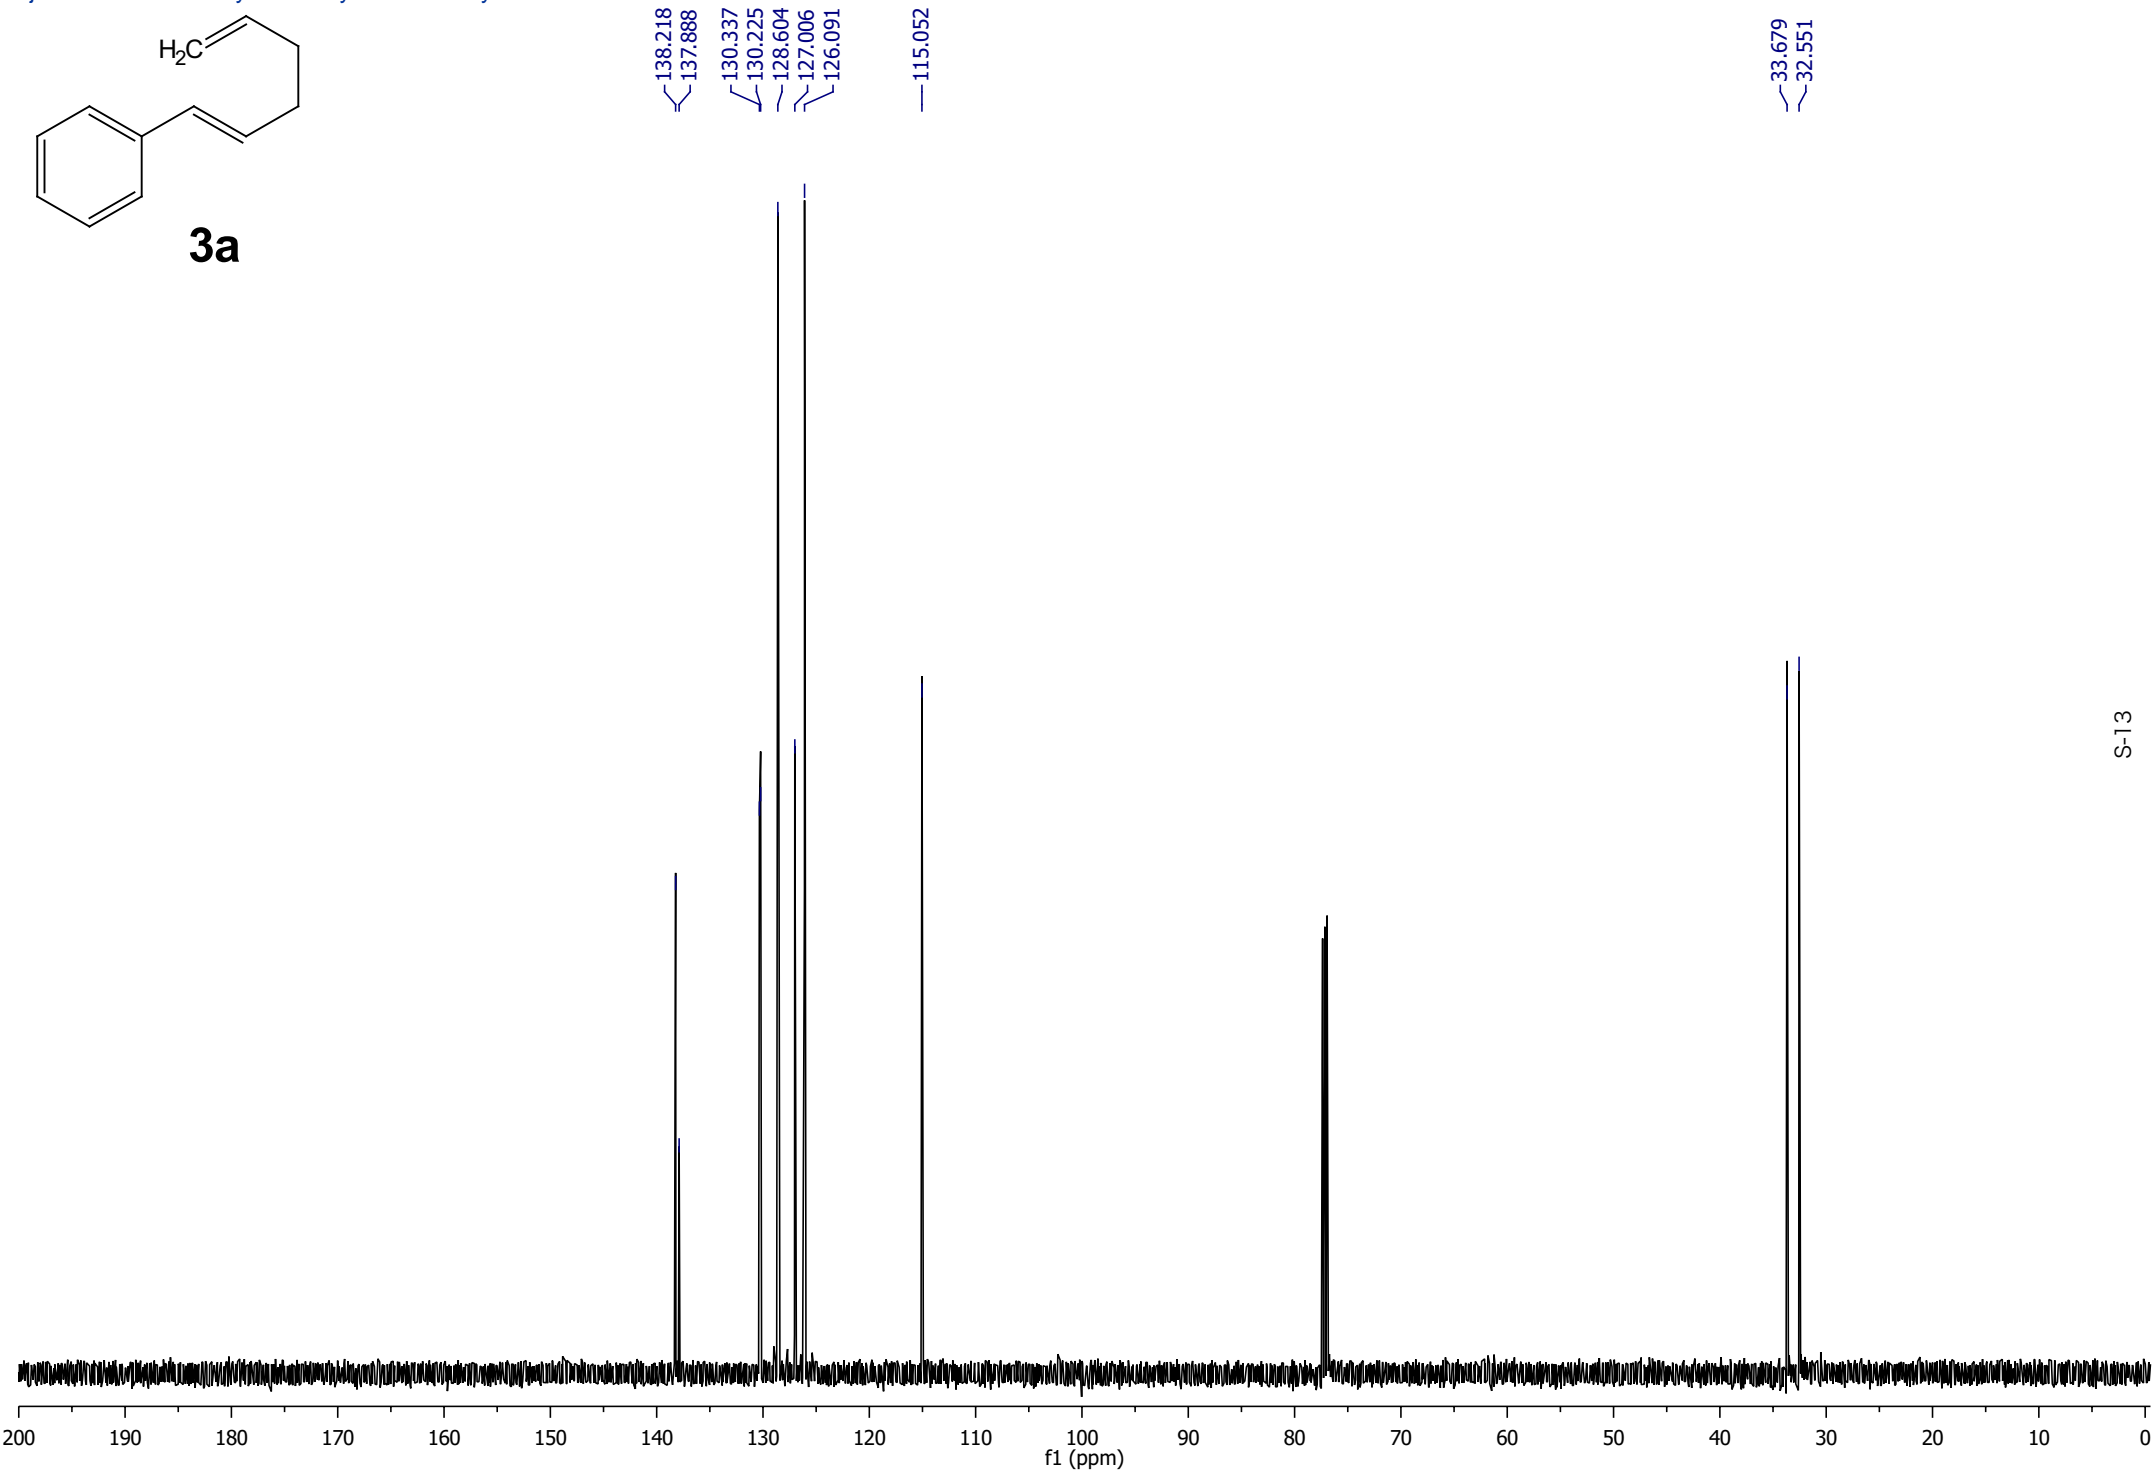

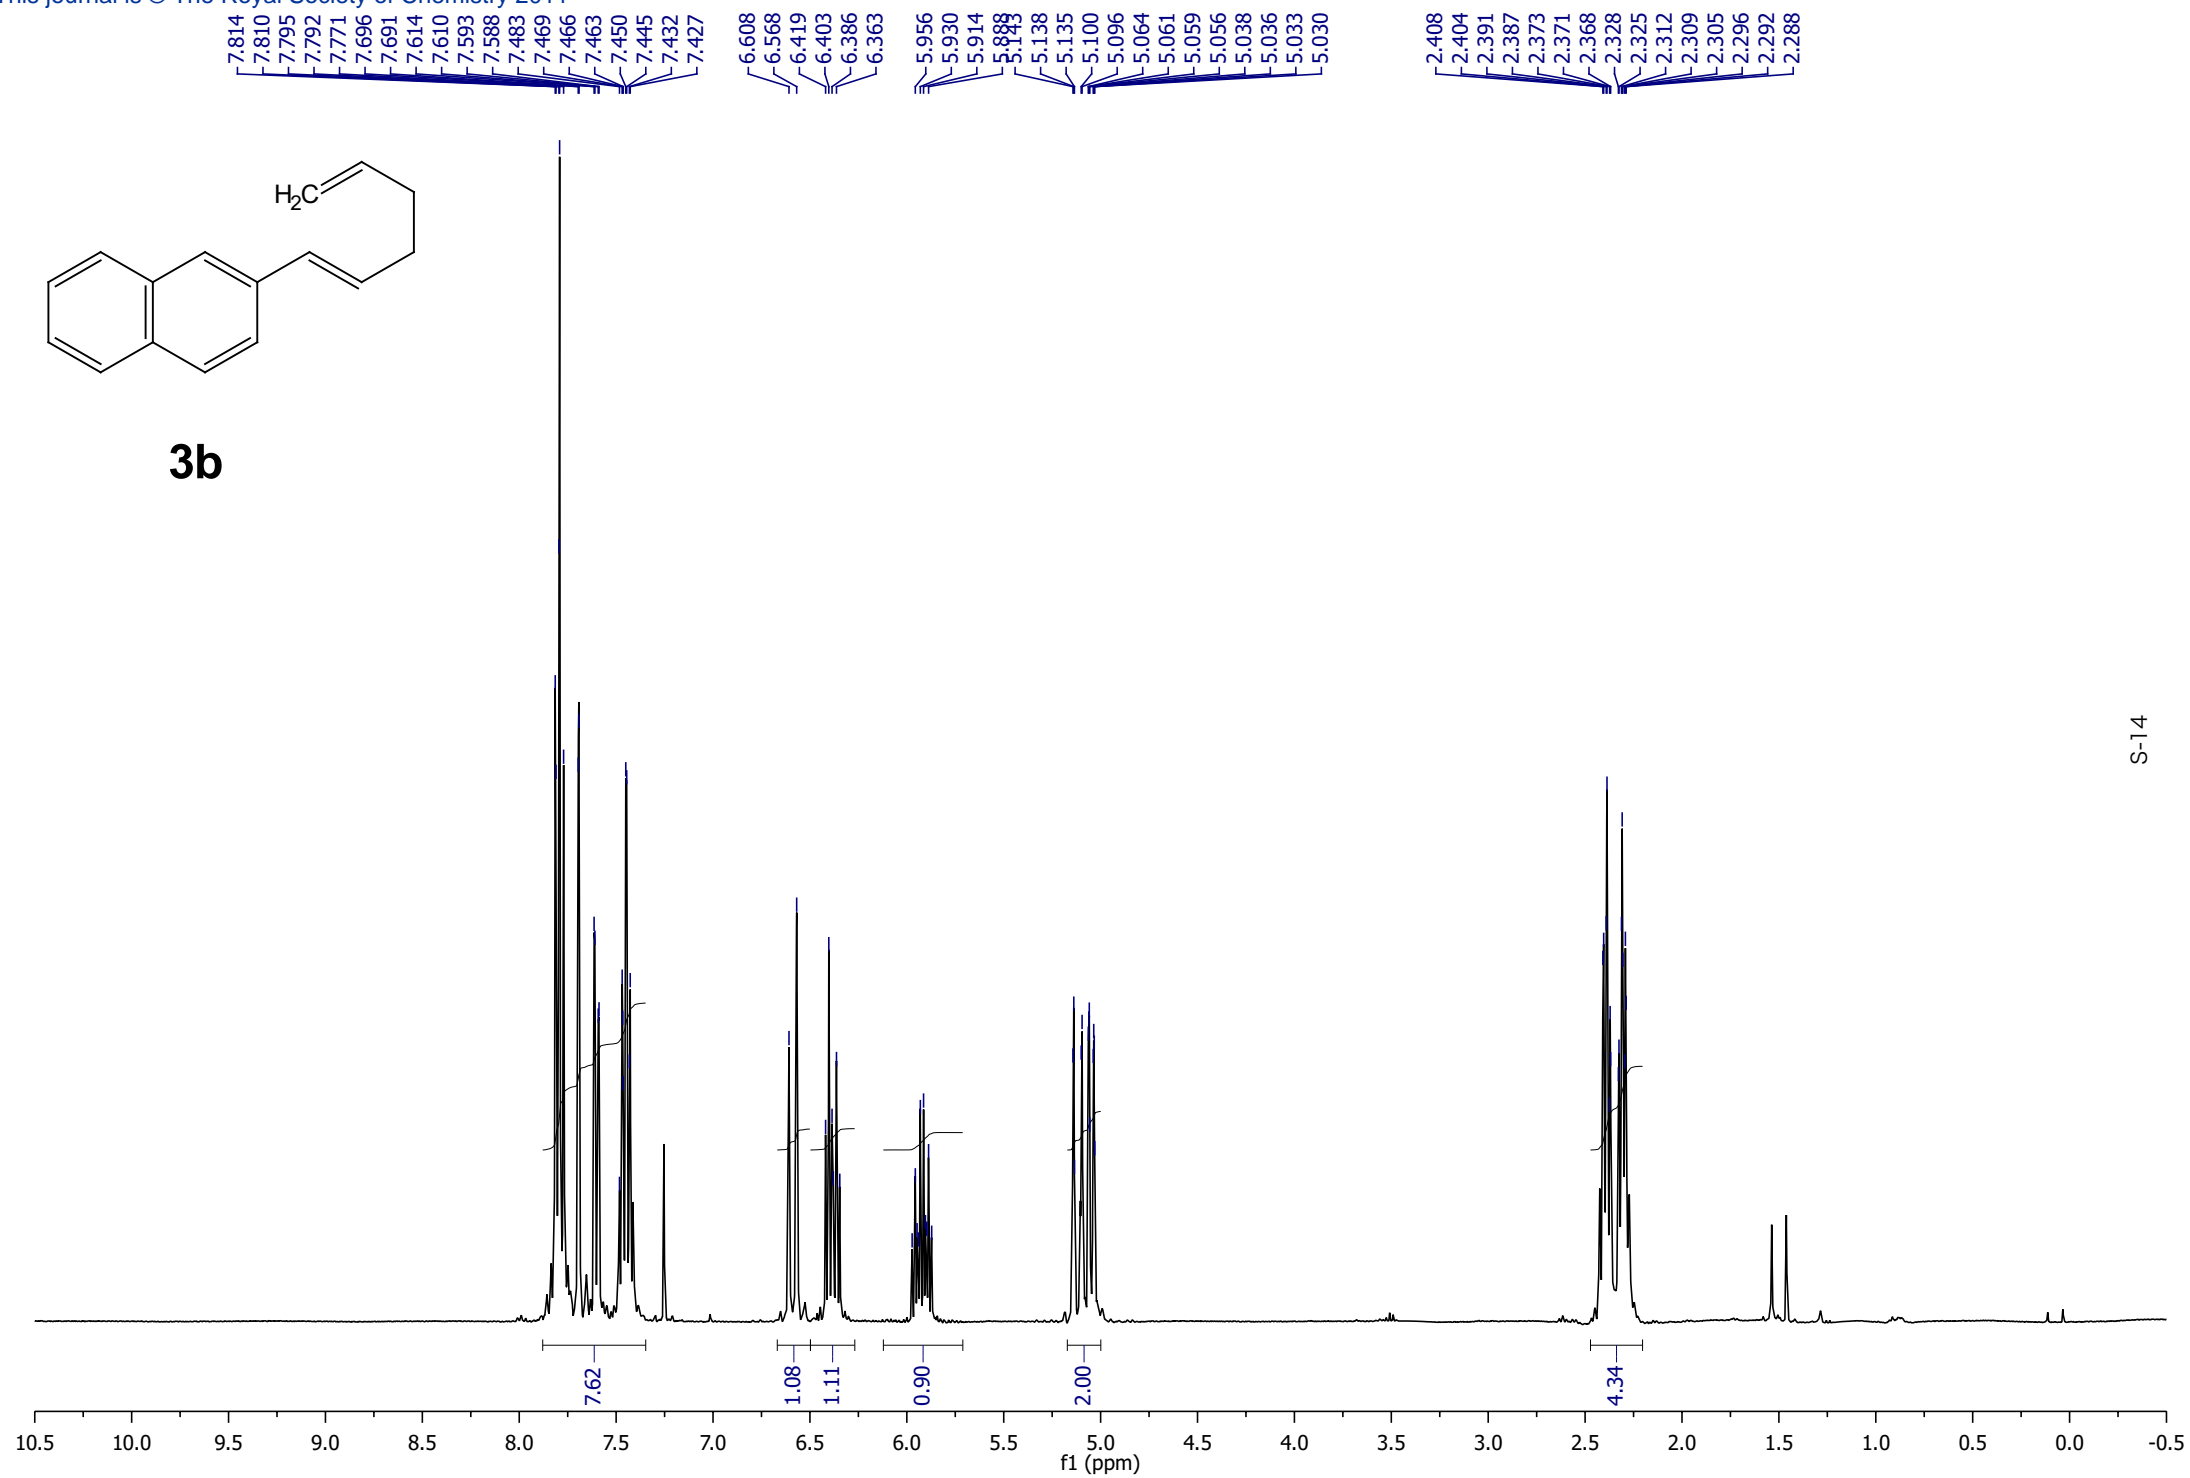

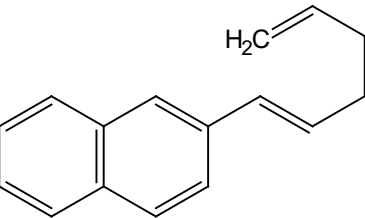

**3b**

138.174  
135.284  
133.770  
132.774  
130.653  
130.405  
128.121  
127.897  
127.698  
126.197  
125.542  
123.634  
115.063

33.654  
32.637

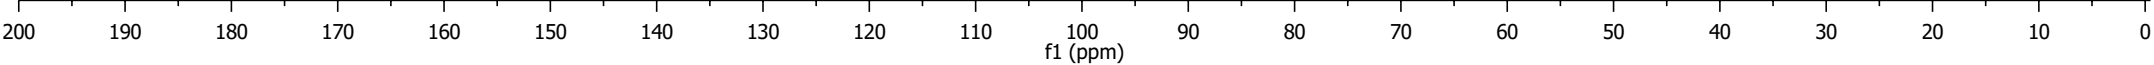

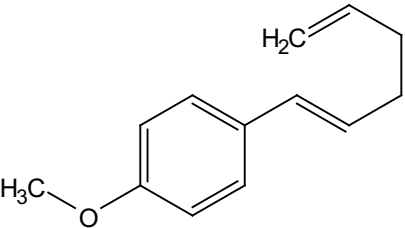

**3c**

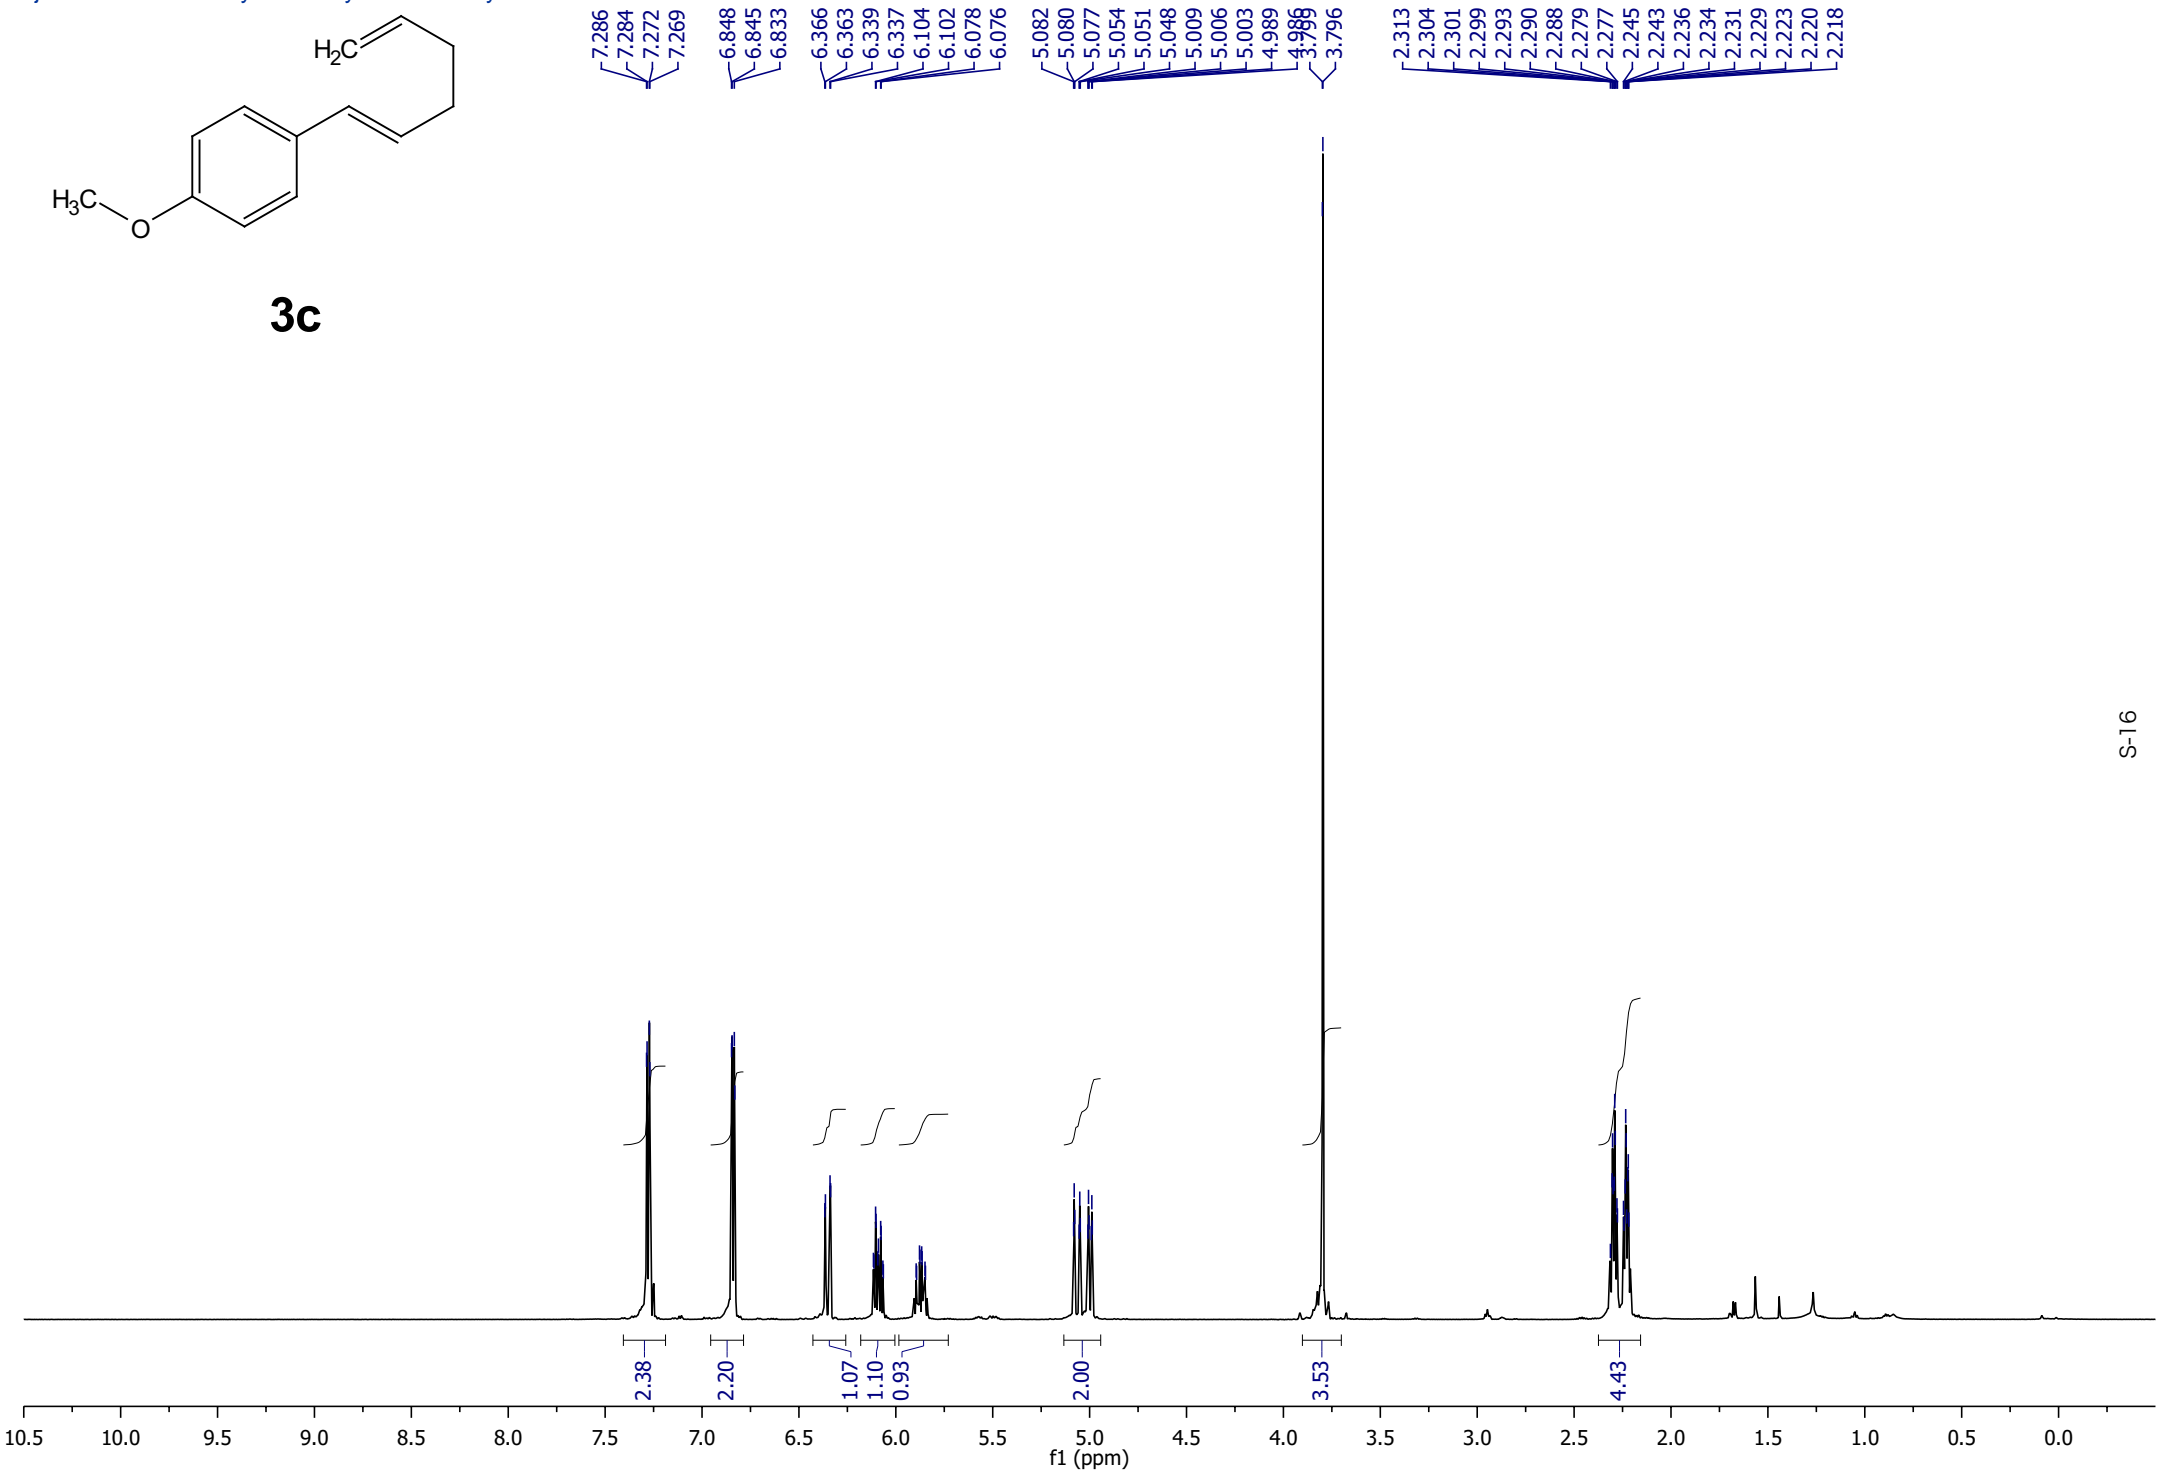



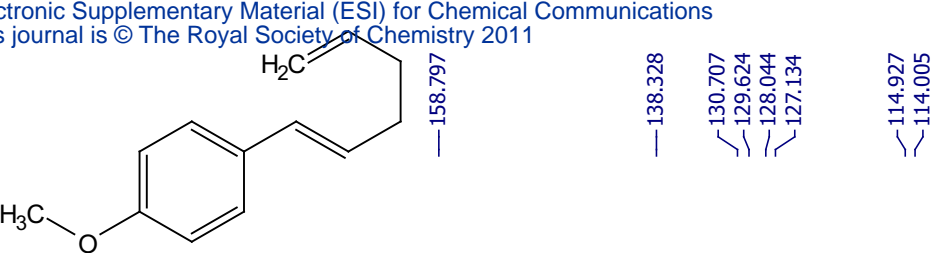

**3c**

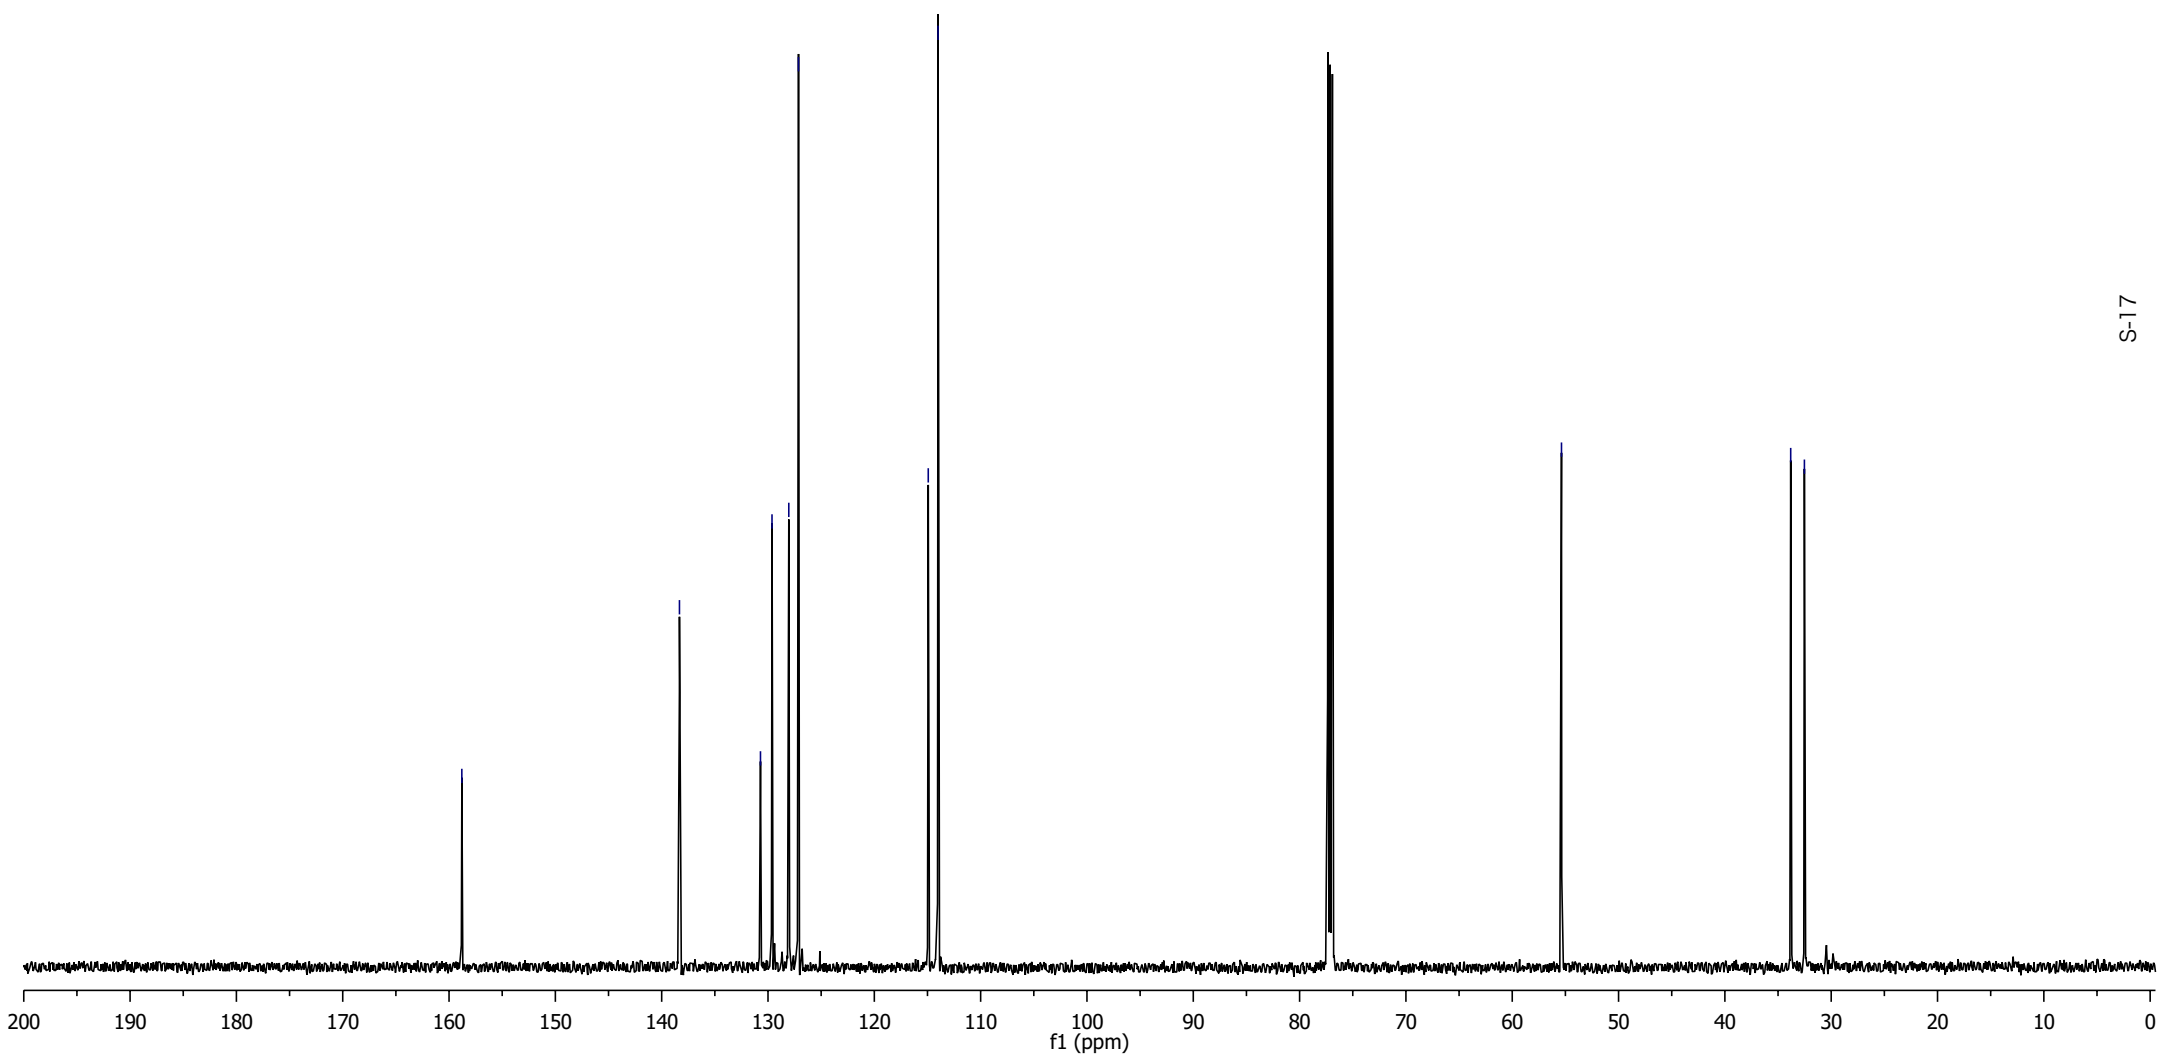

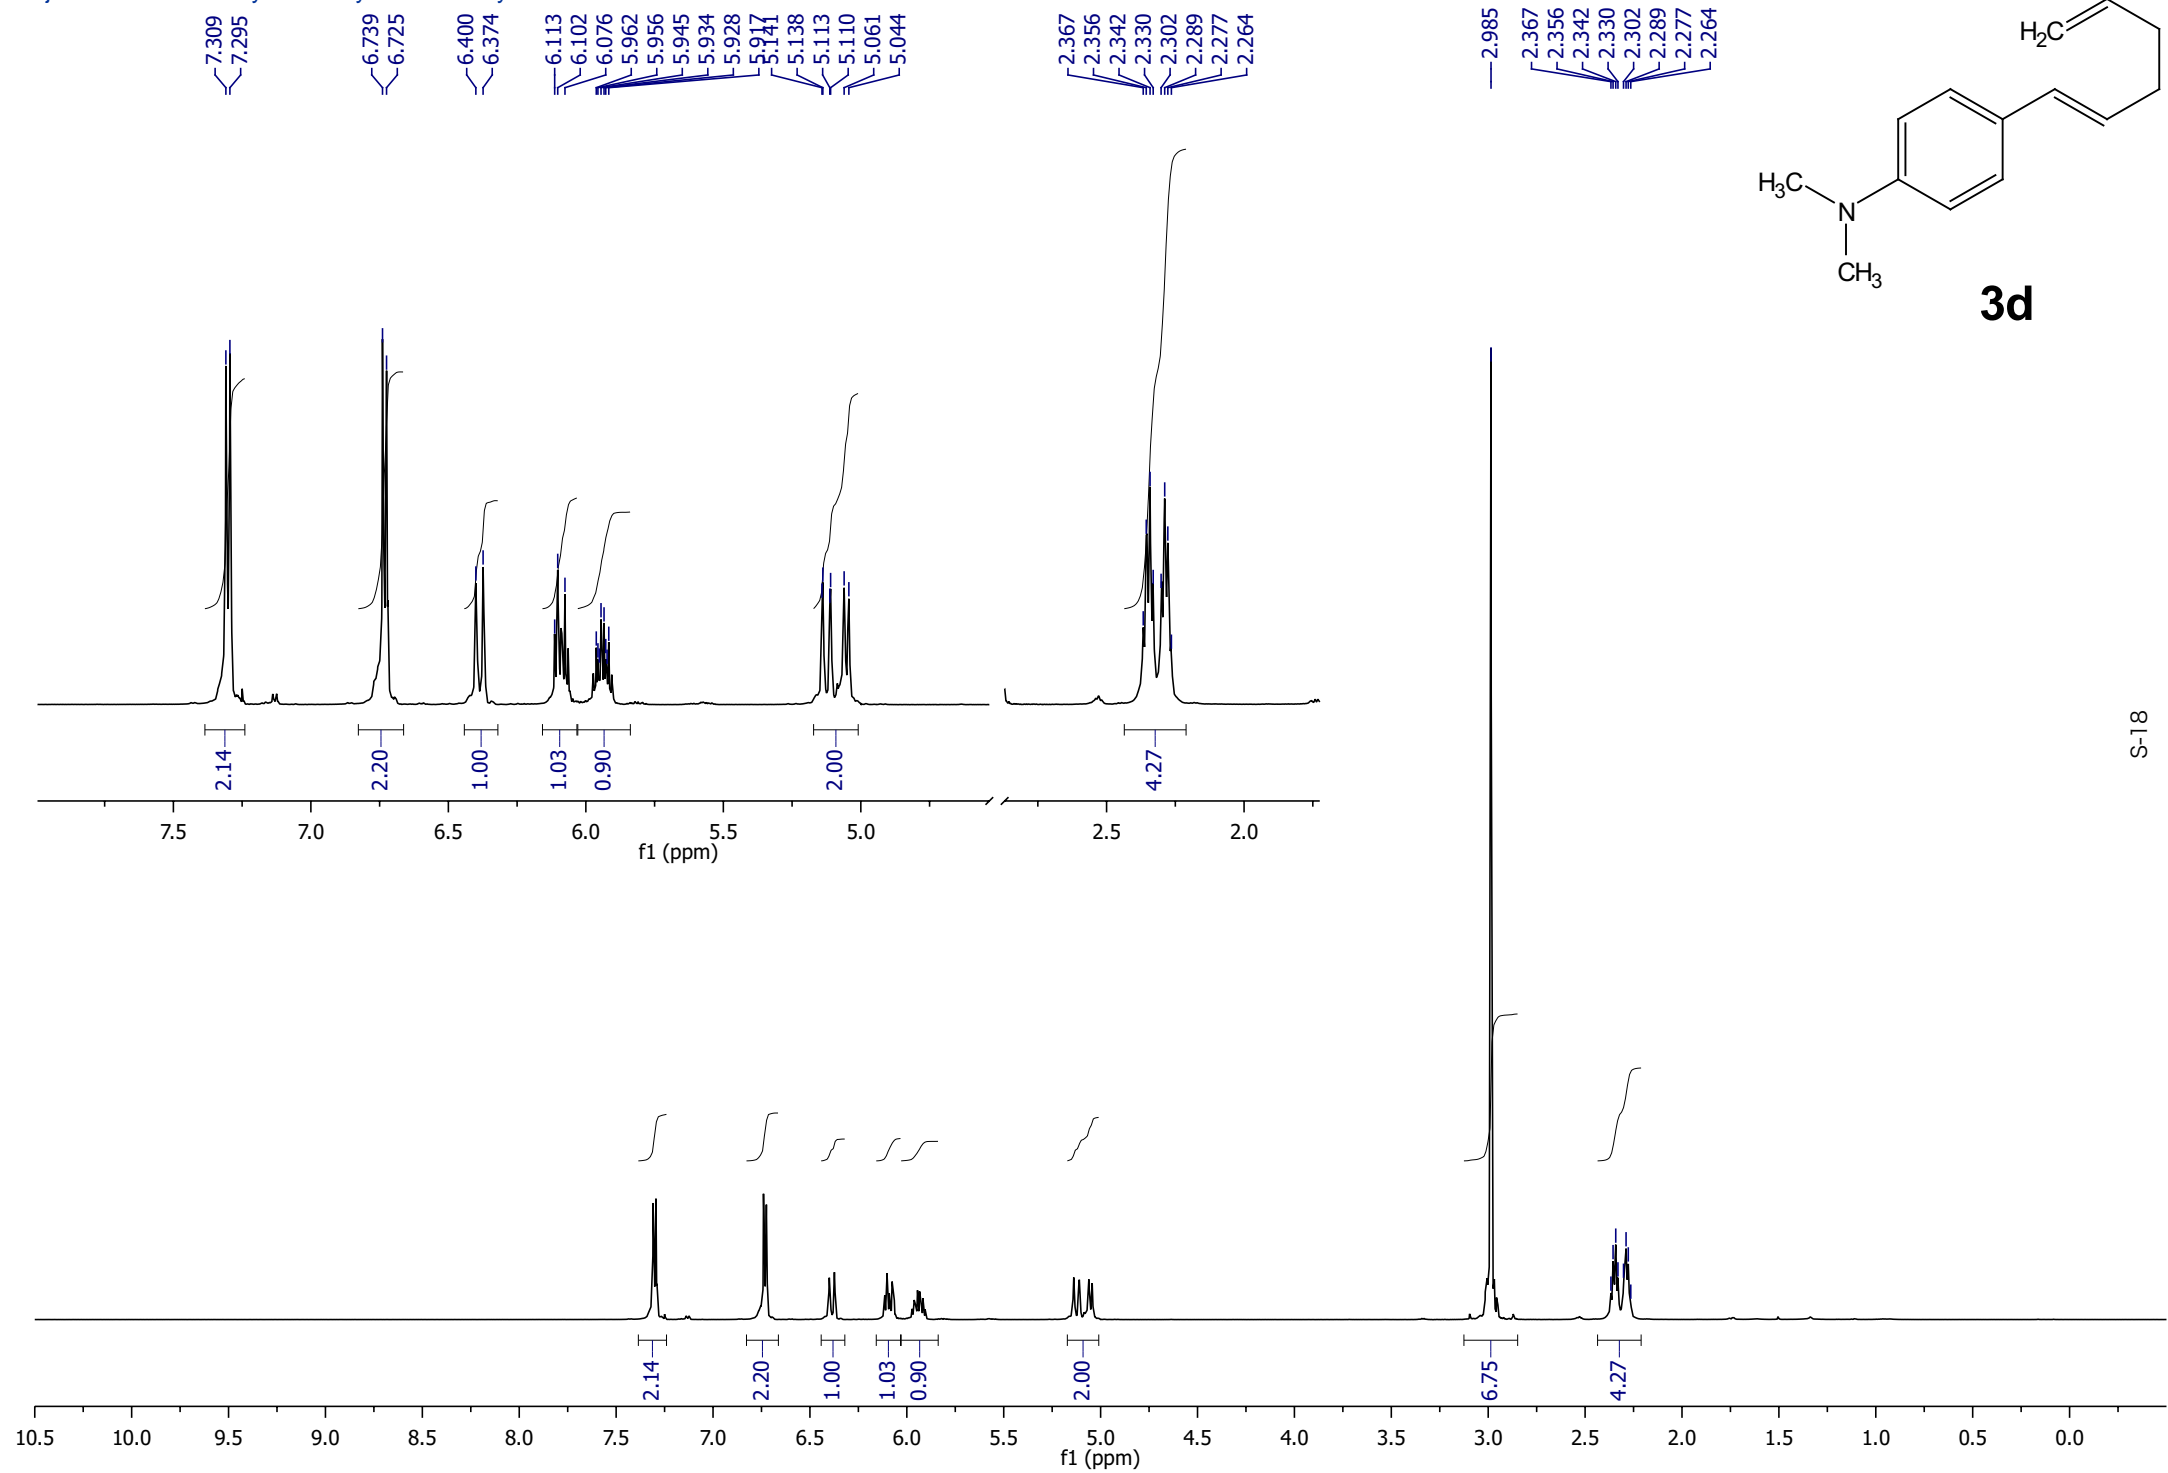

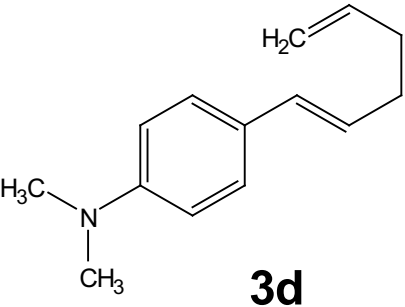

—149.875

—138.567

—130.099

—126.972

—126.689

—126.028

—114.856

—112.778

—40.775

—34.102

—32.700

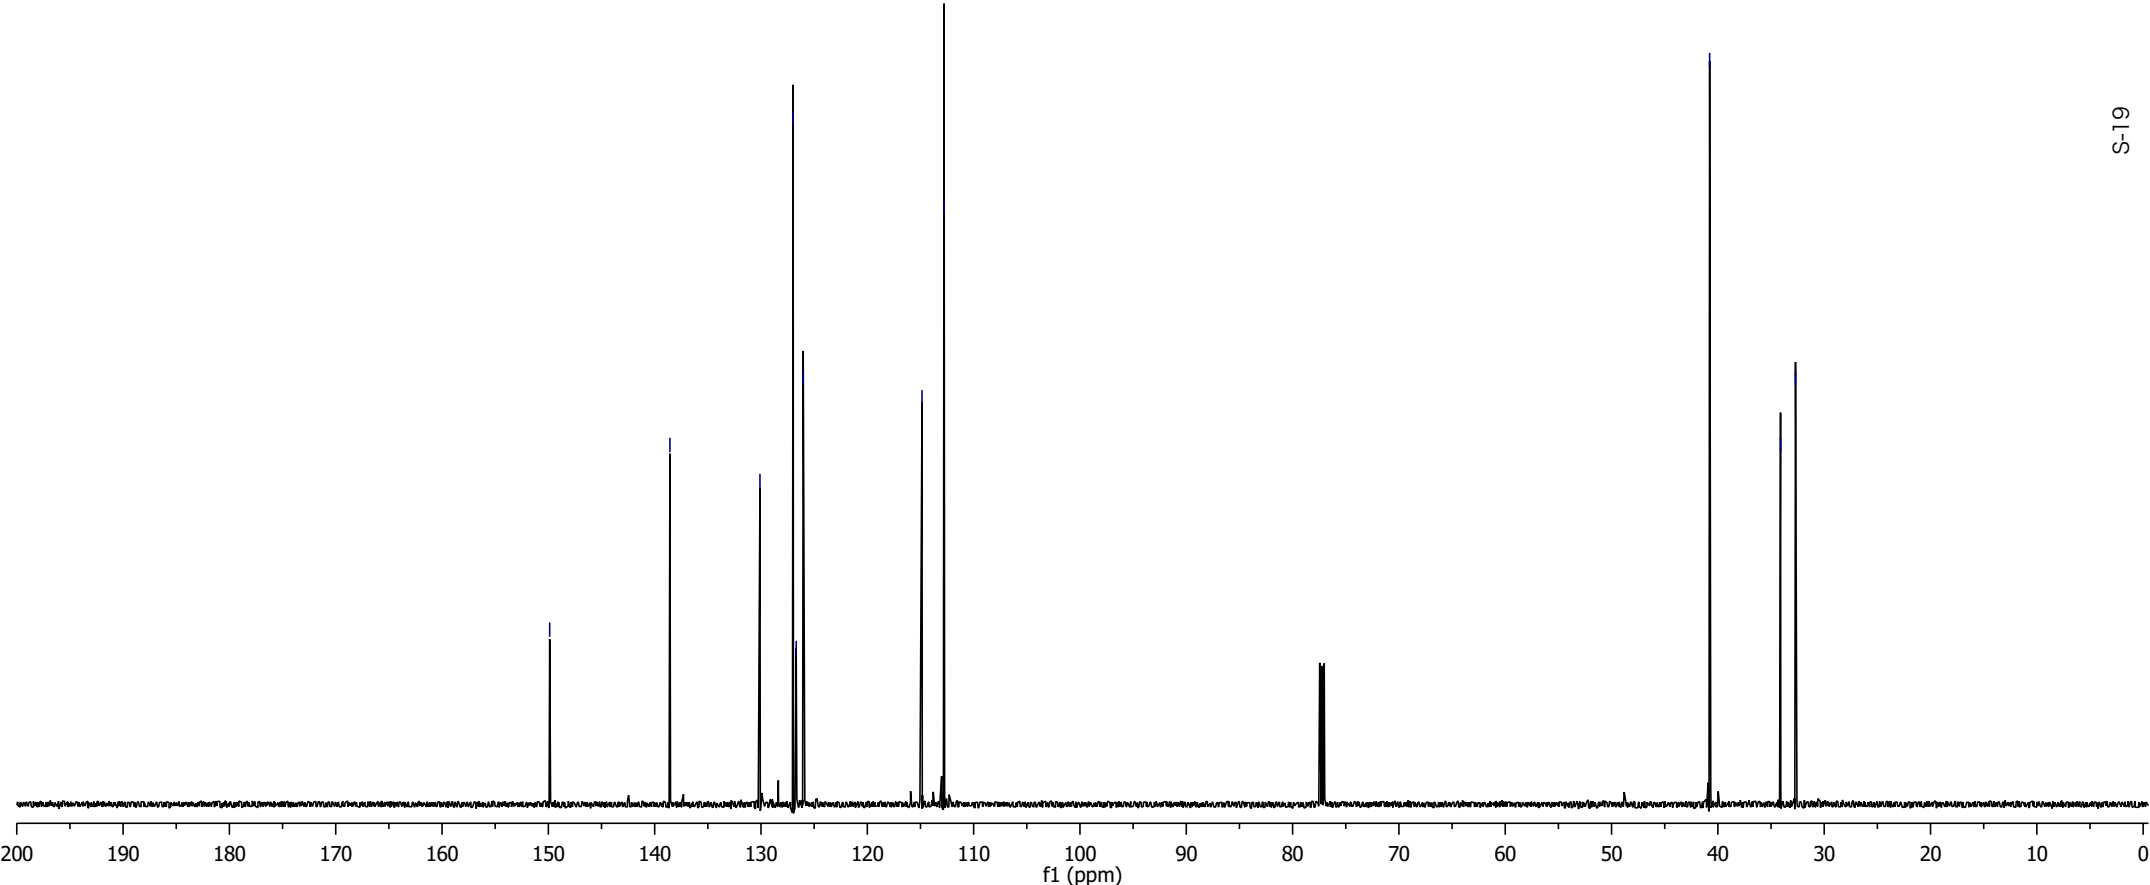

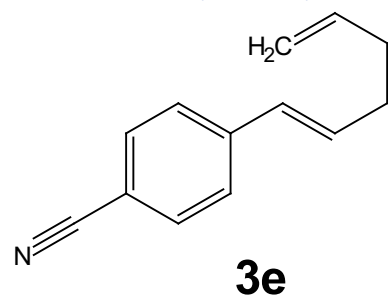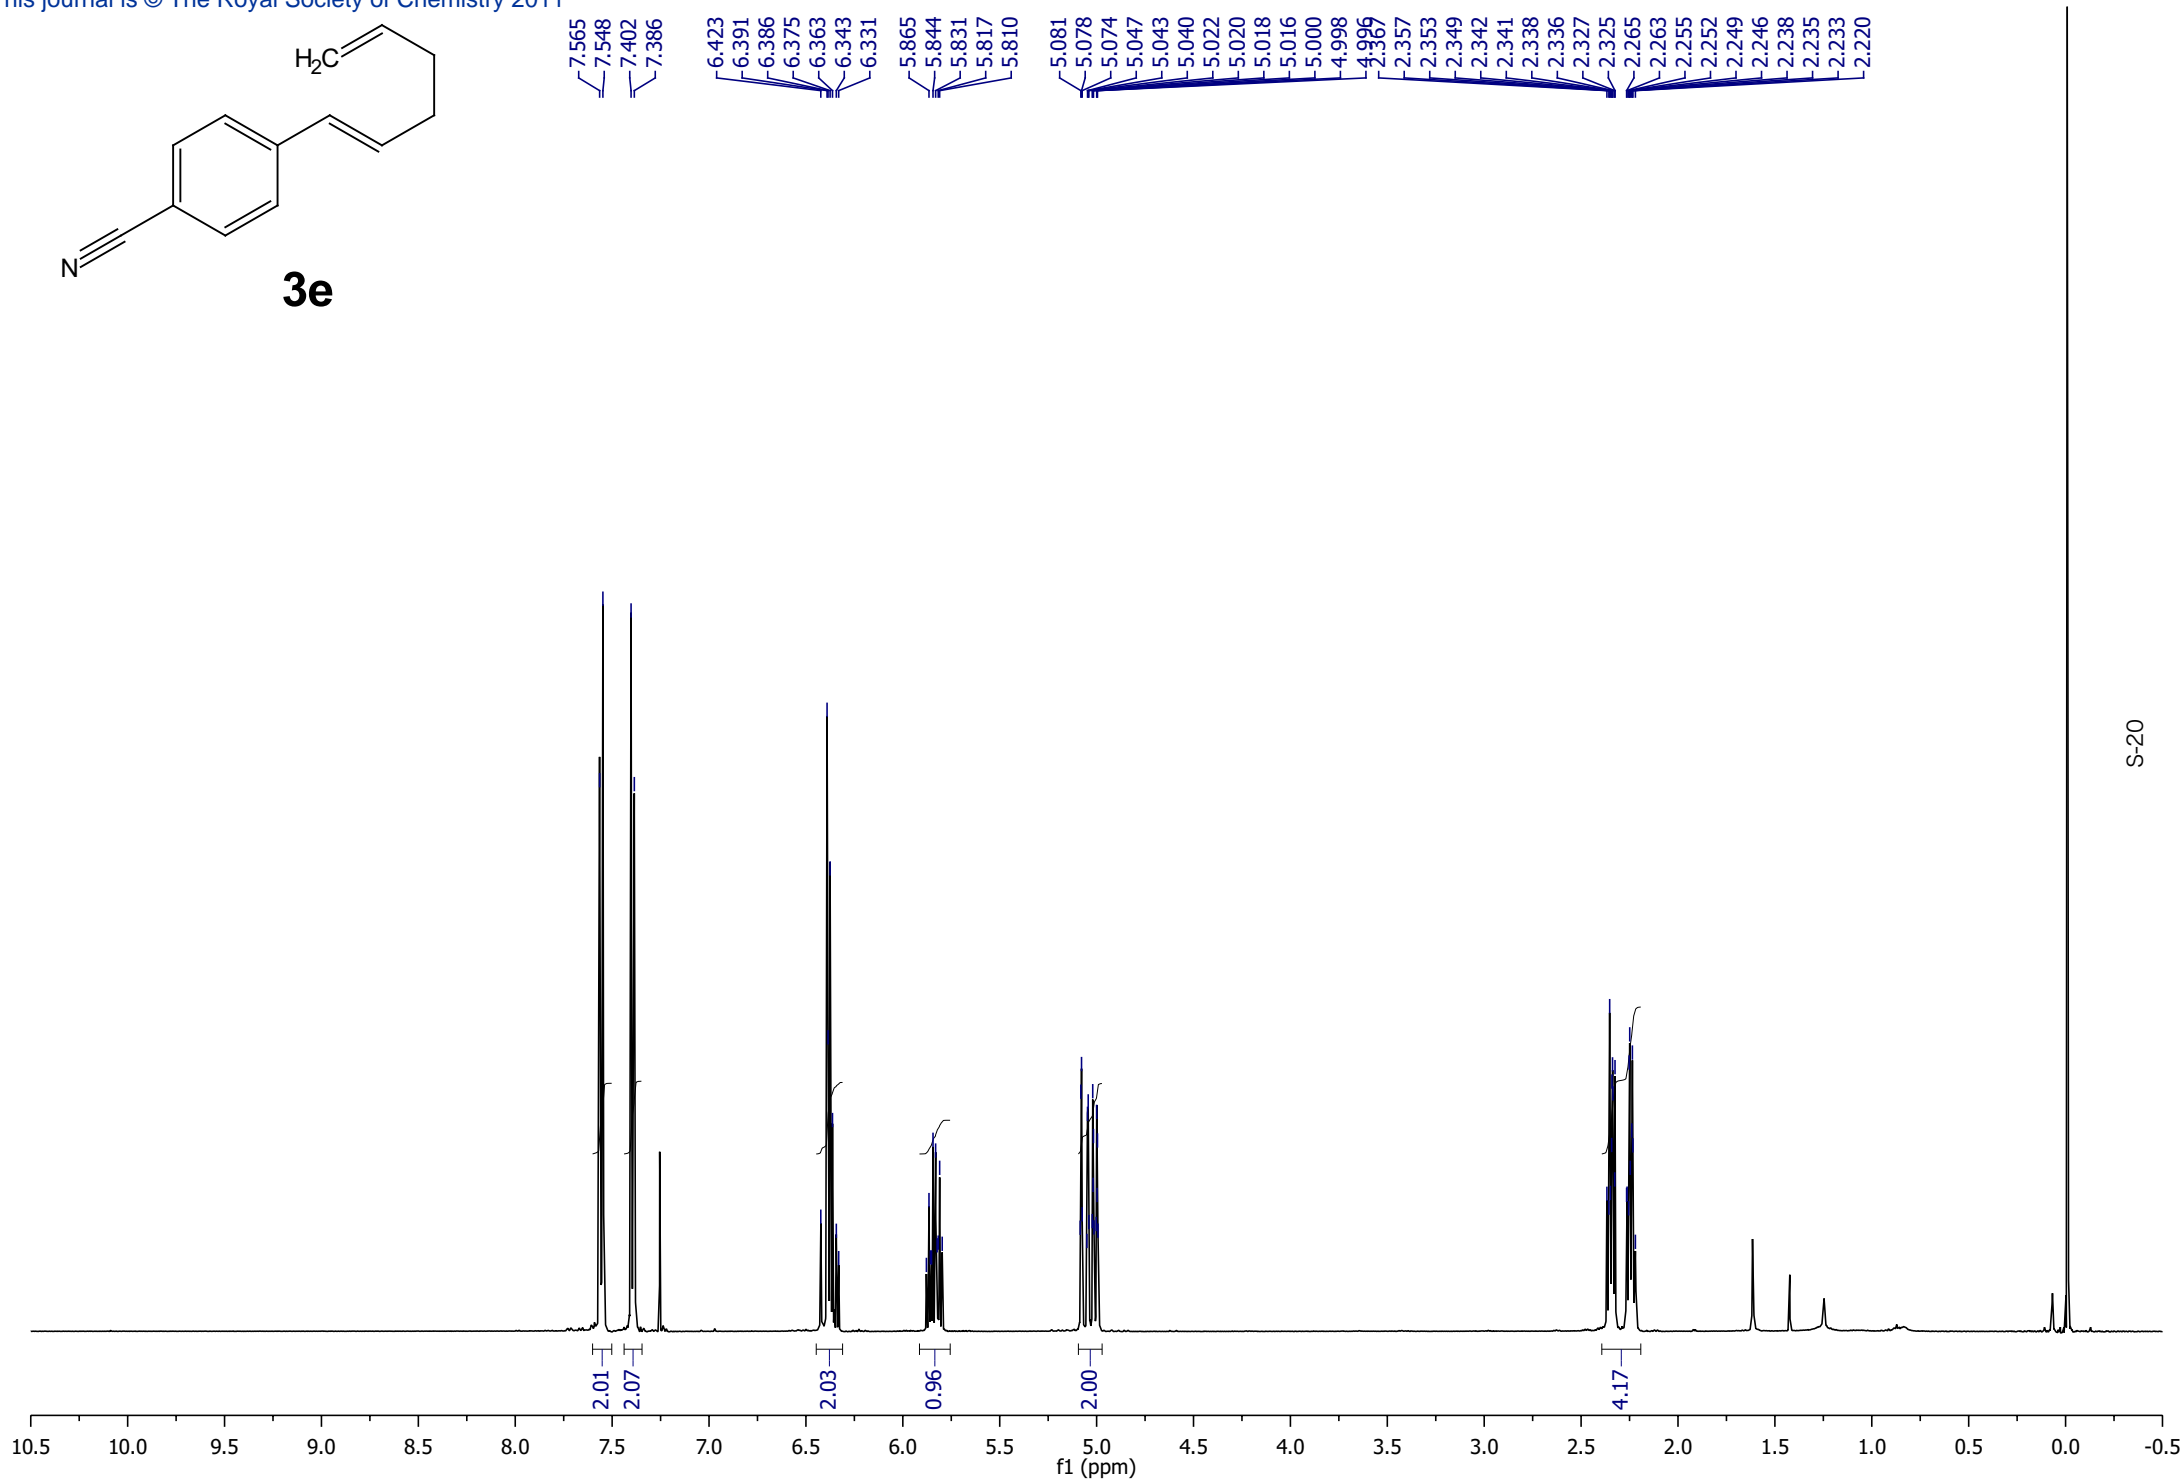

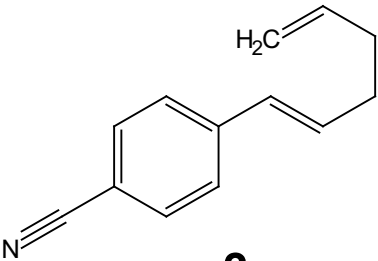

**3e**

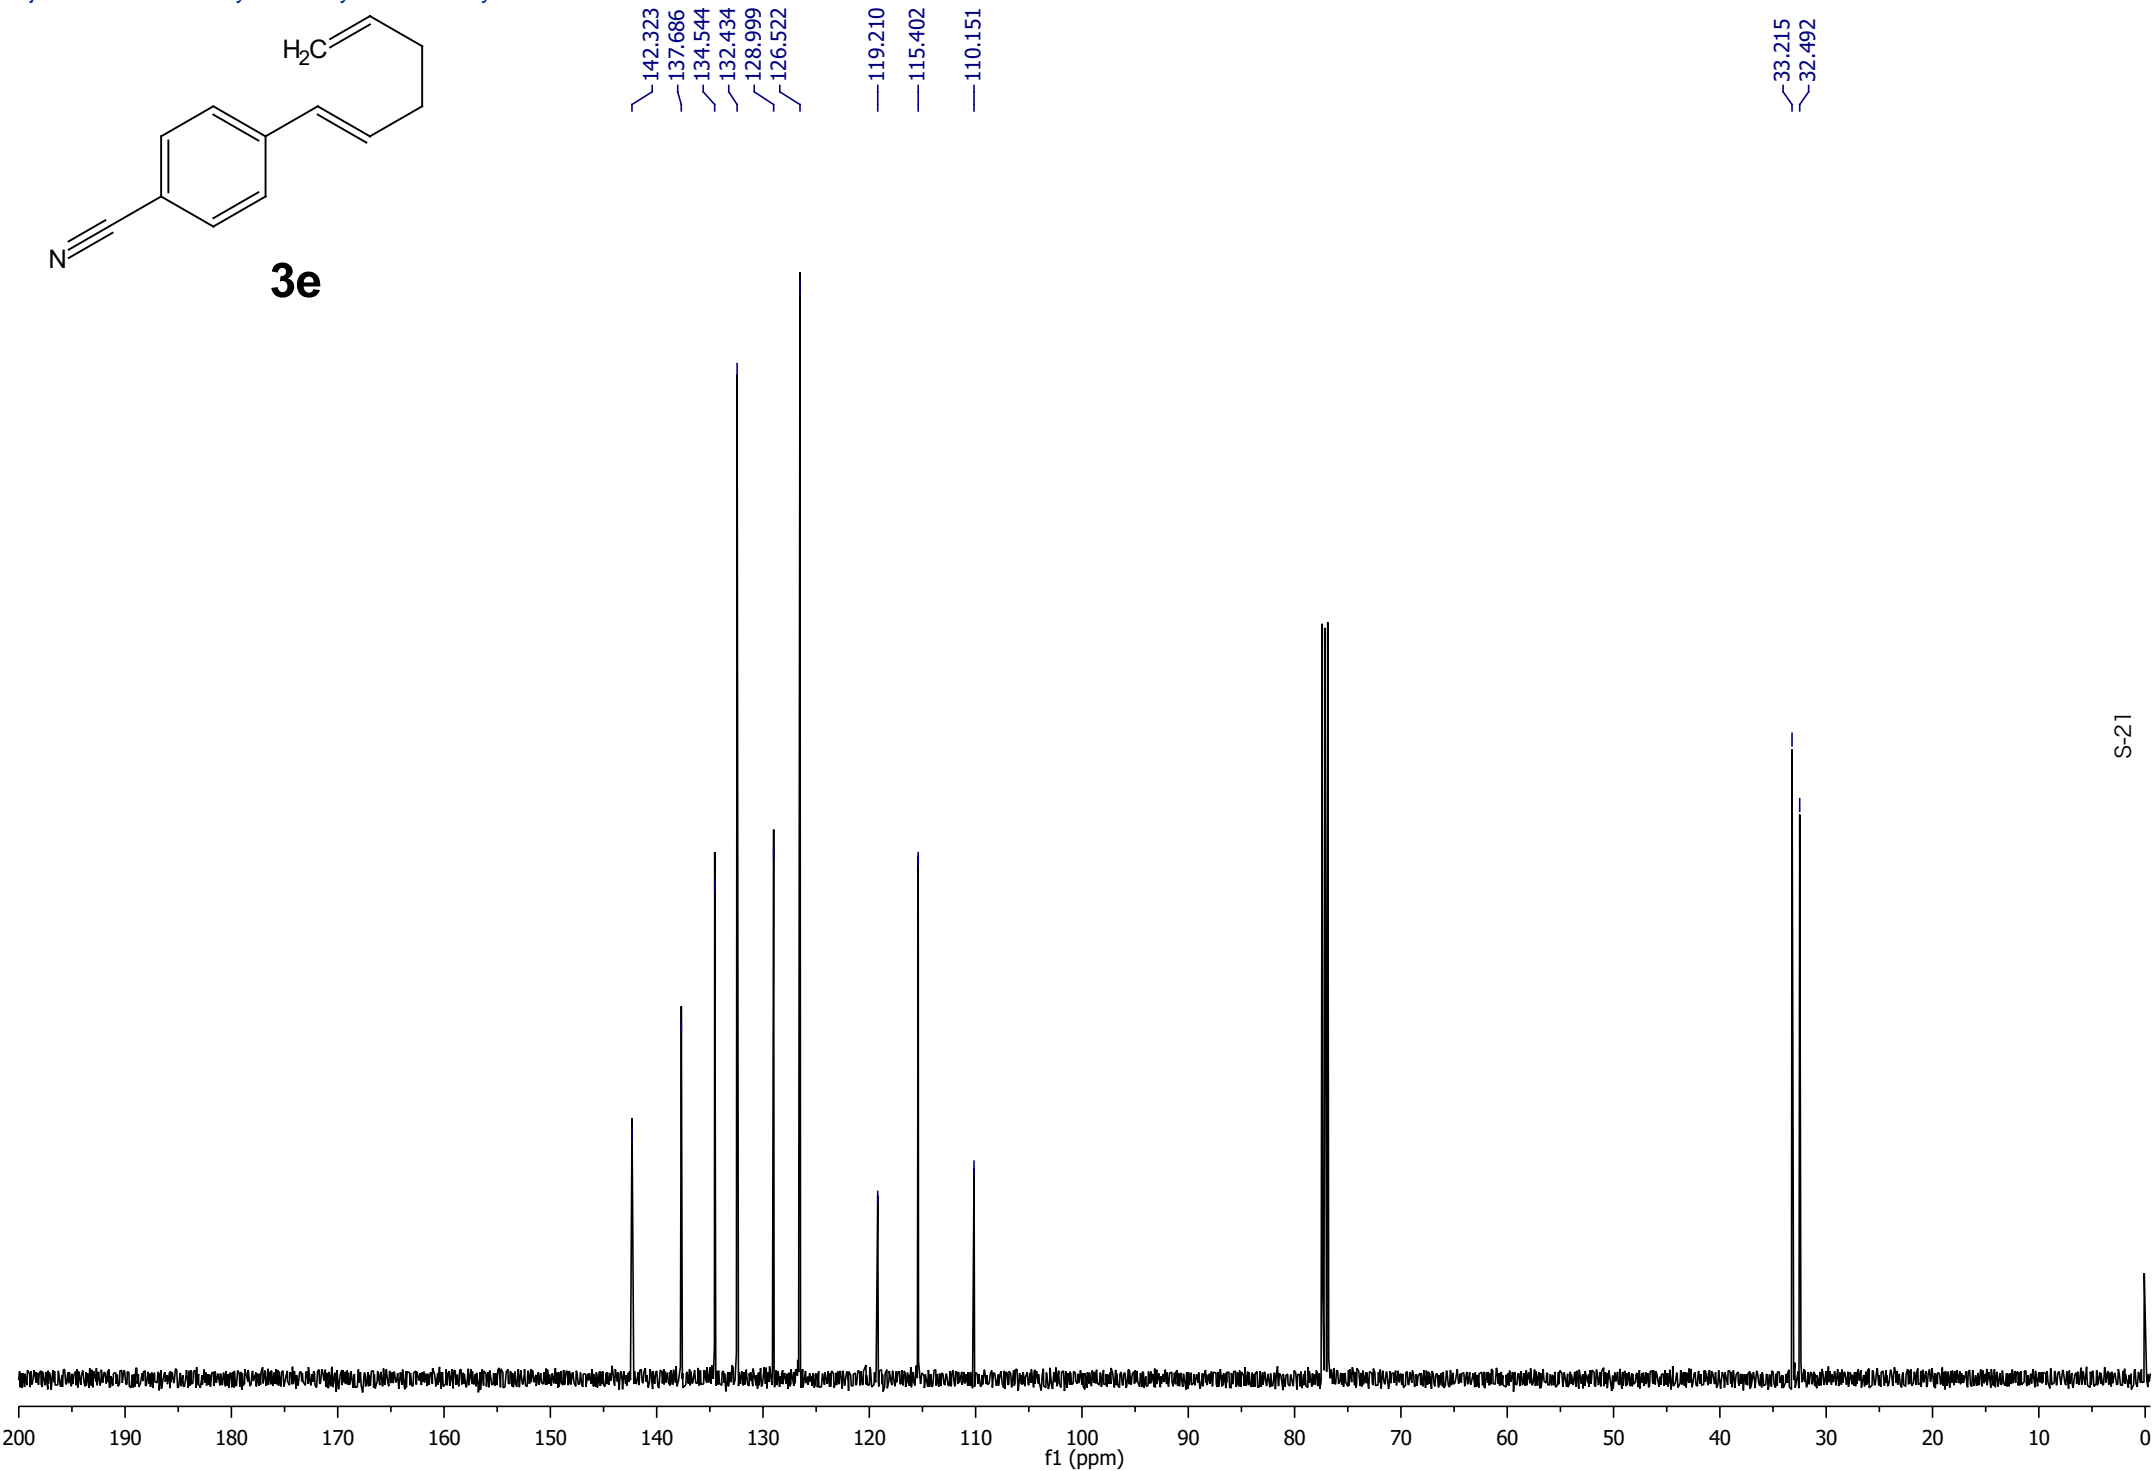

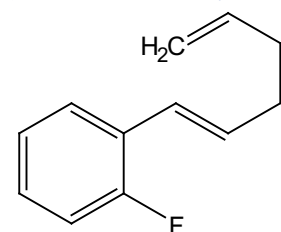

**3f**

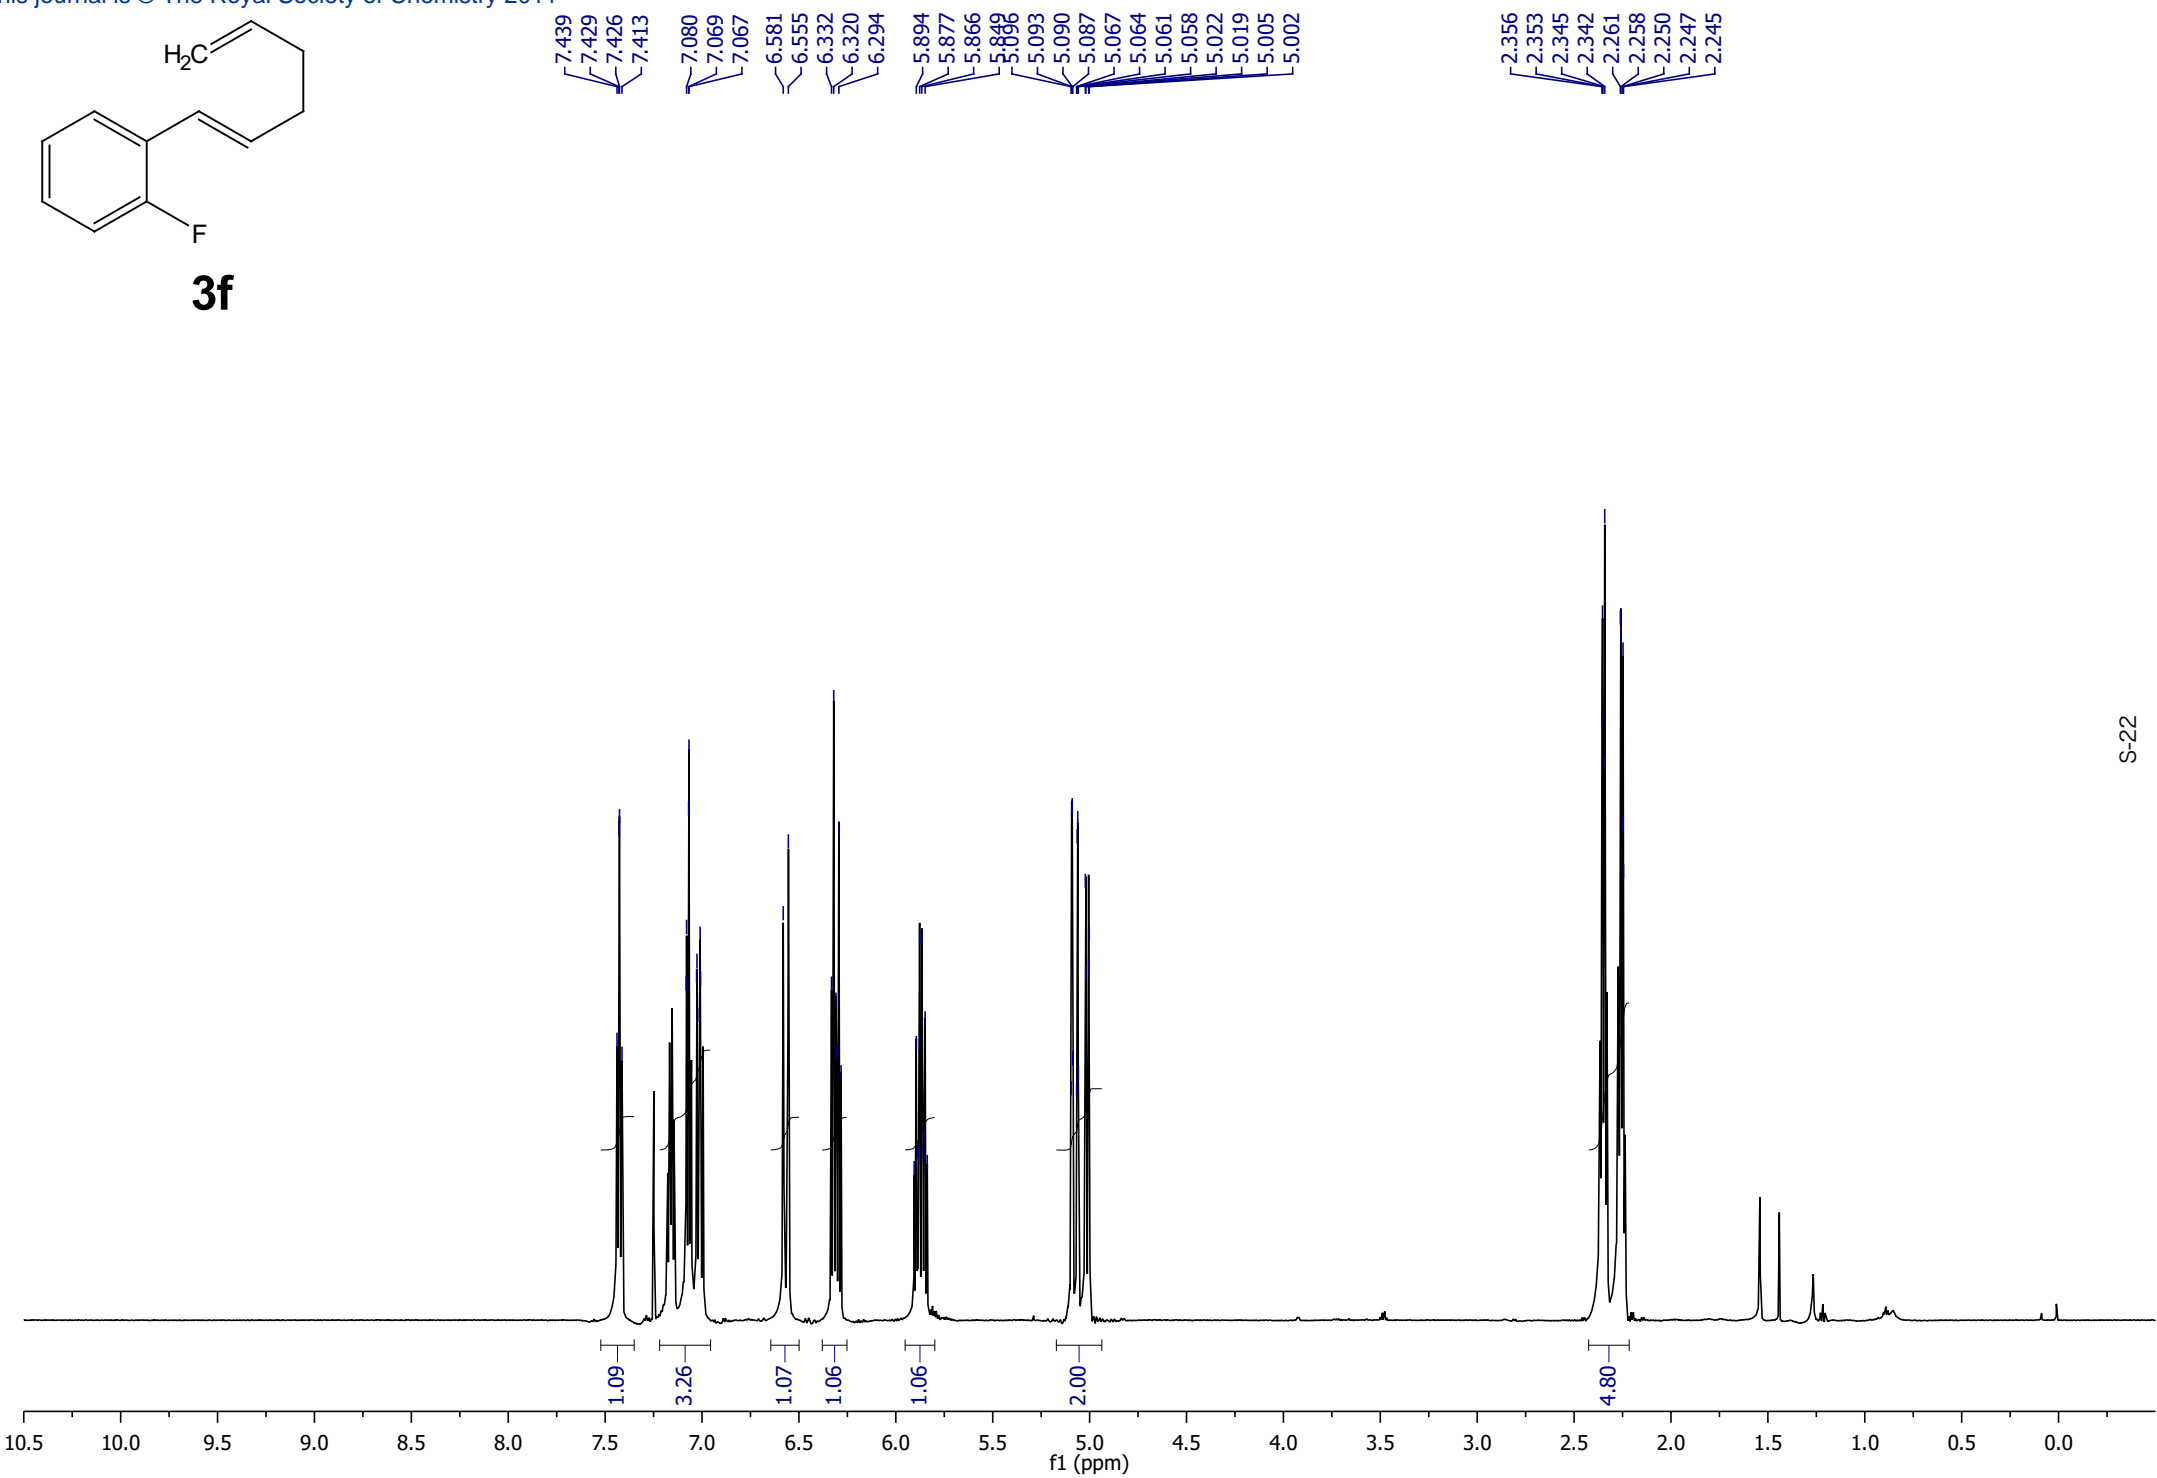

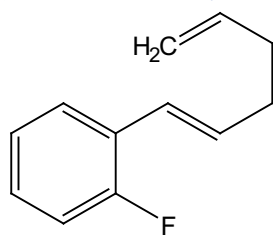

**3f**

160.866  
159.220  
138.064  
132.906  
128.180  
127.132  
127.105  
124.081  
124.057  
123.978  
115.622  
115.114

33.527  
32.885

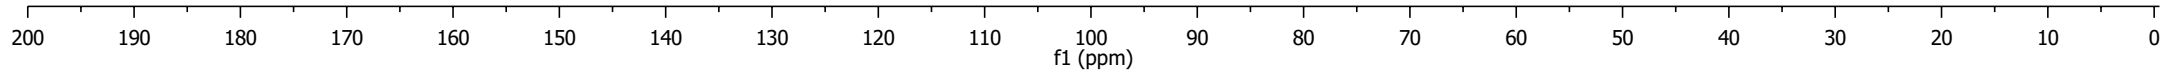

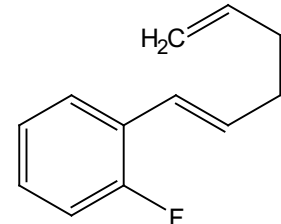

**3f**

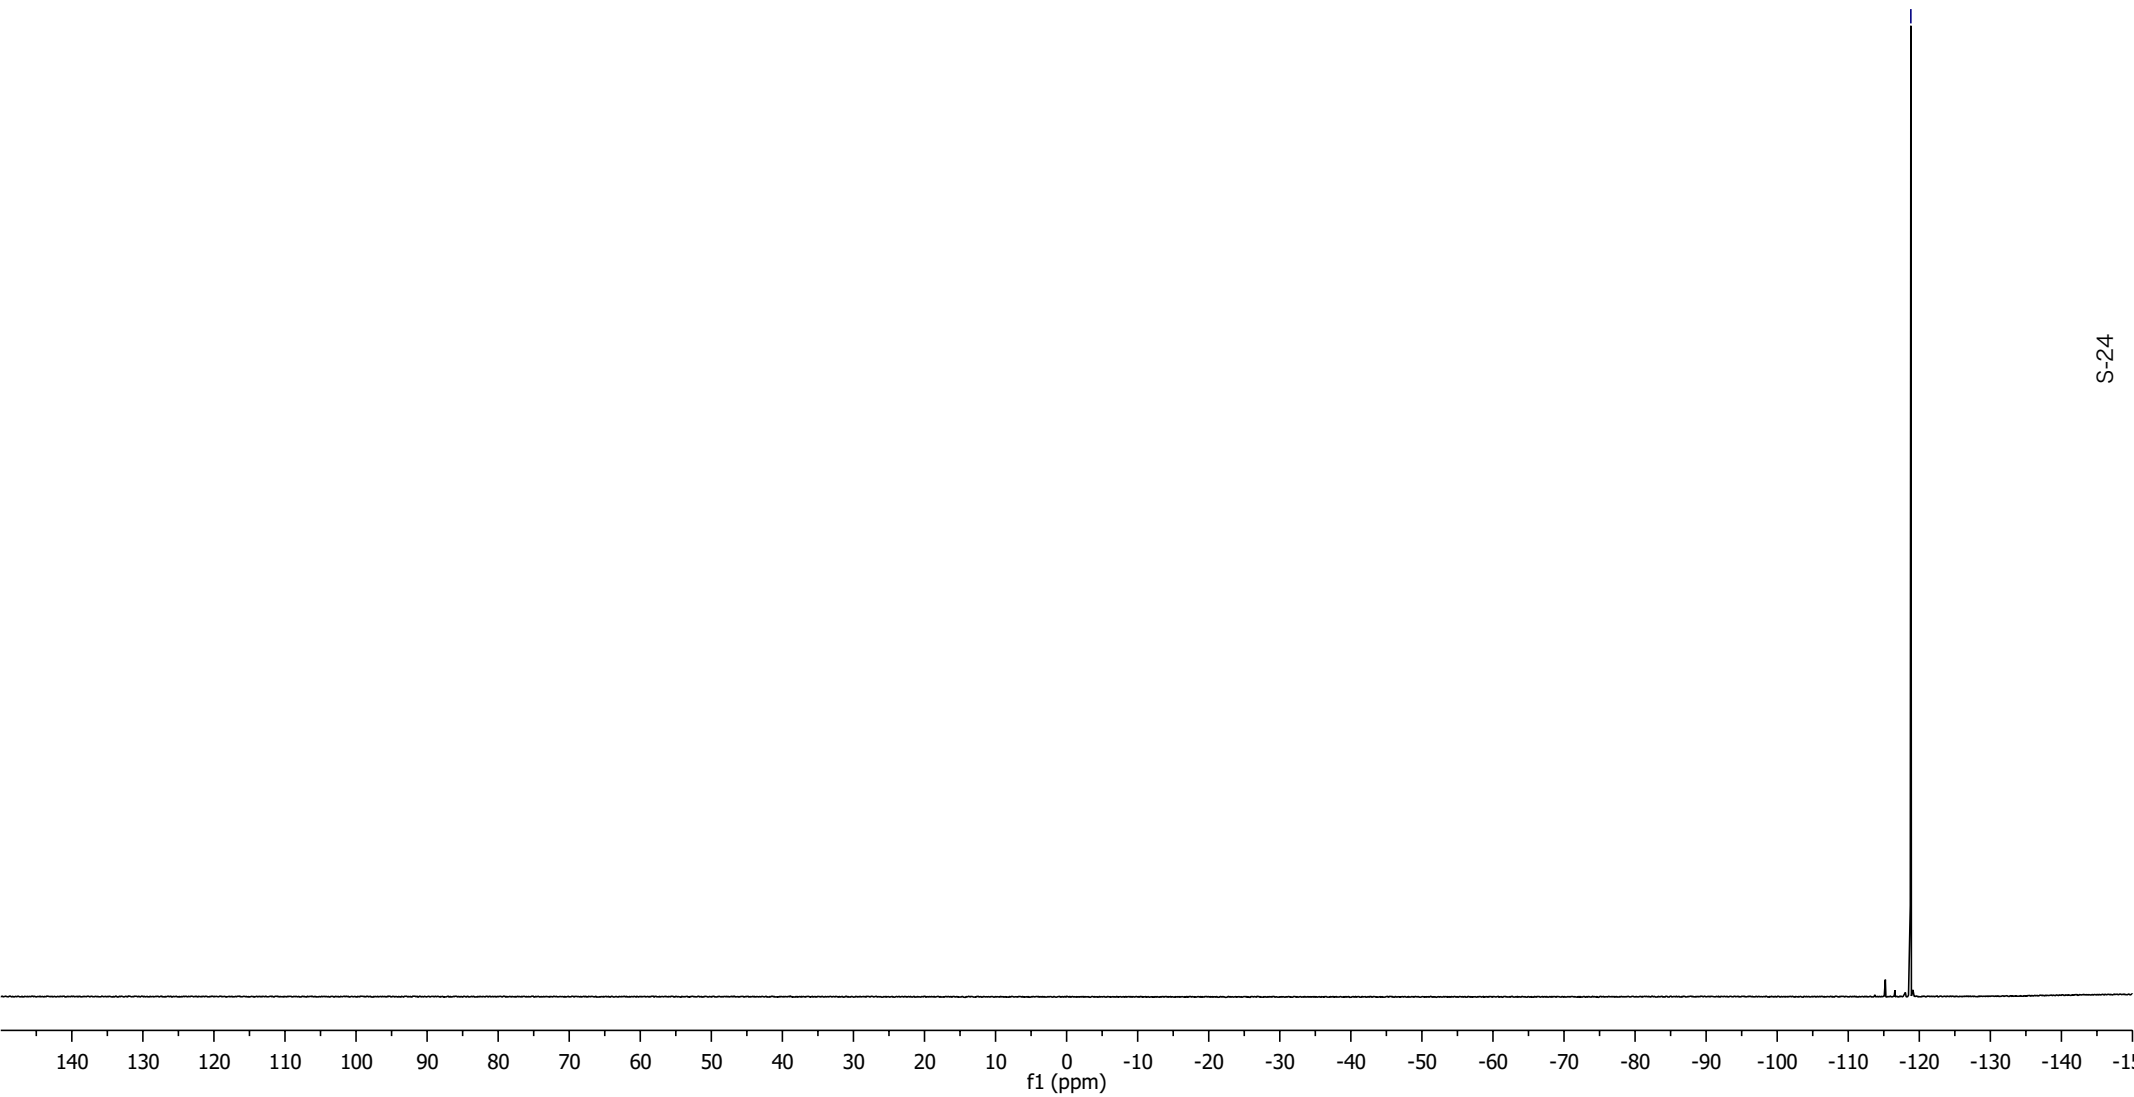



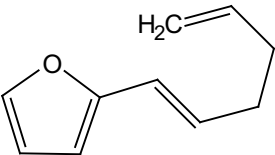

**3g**

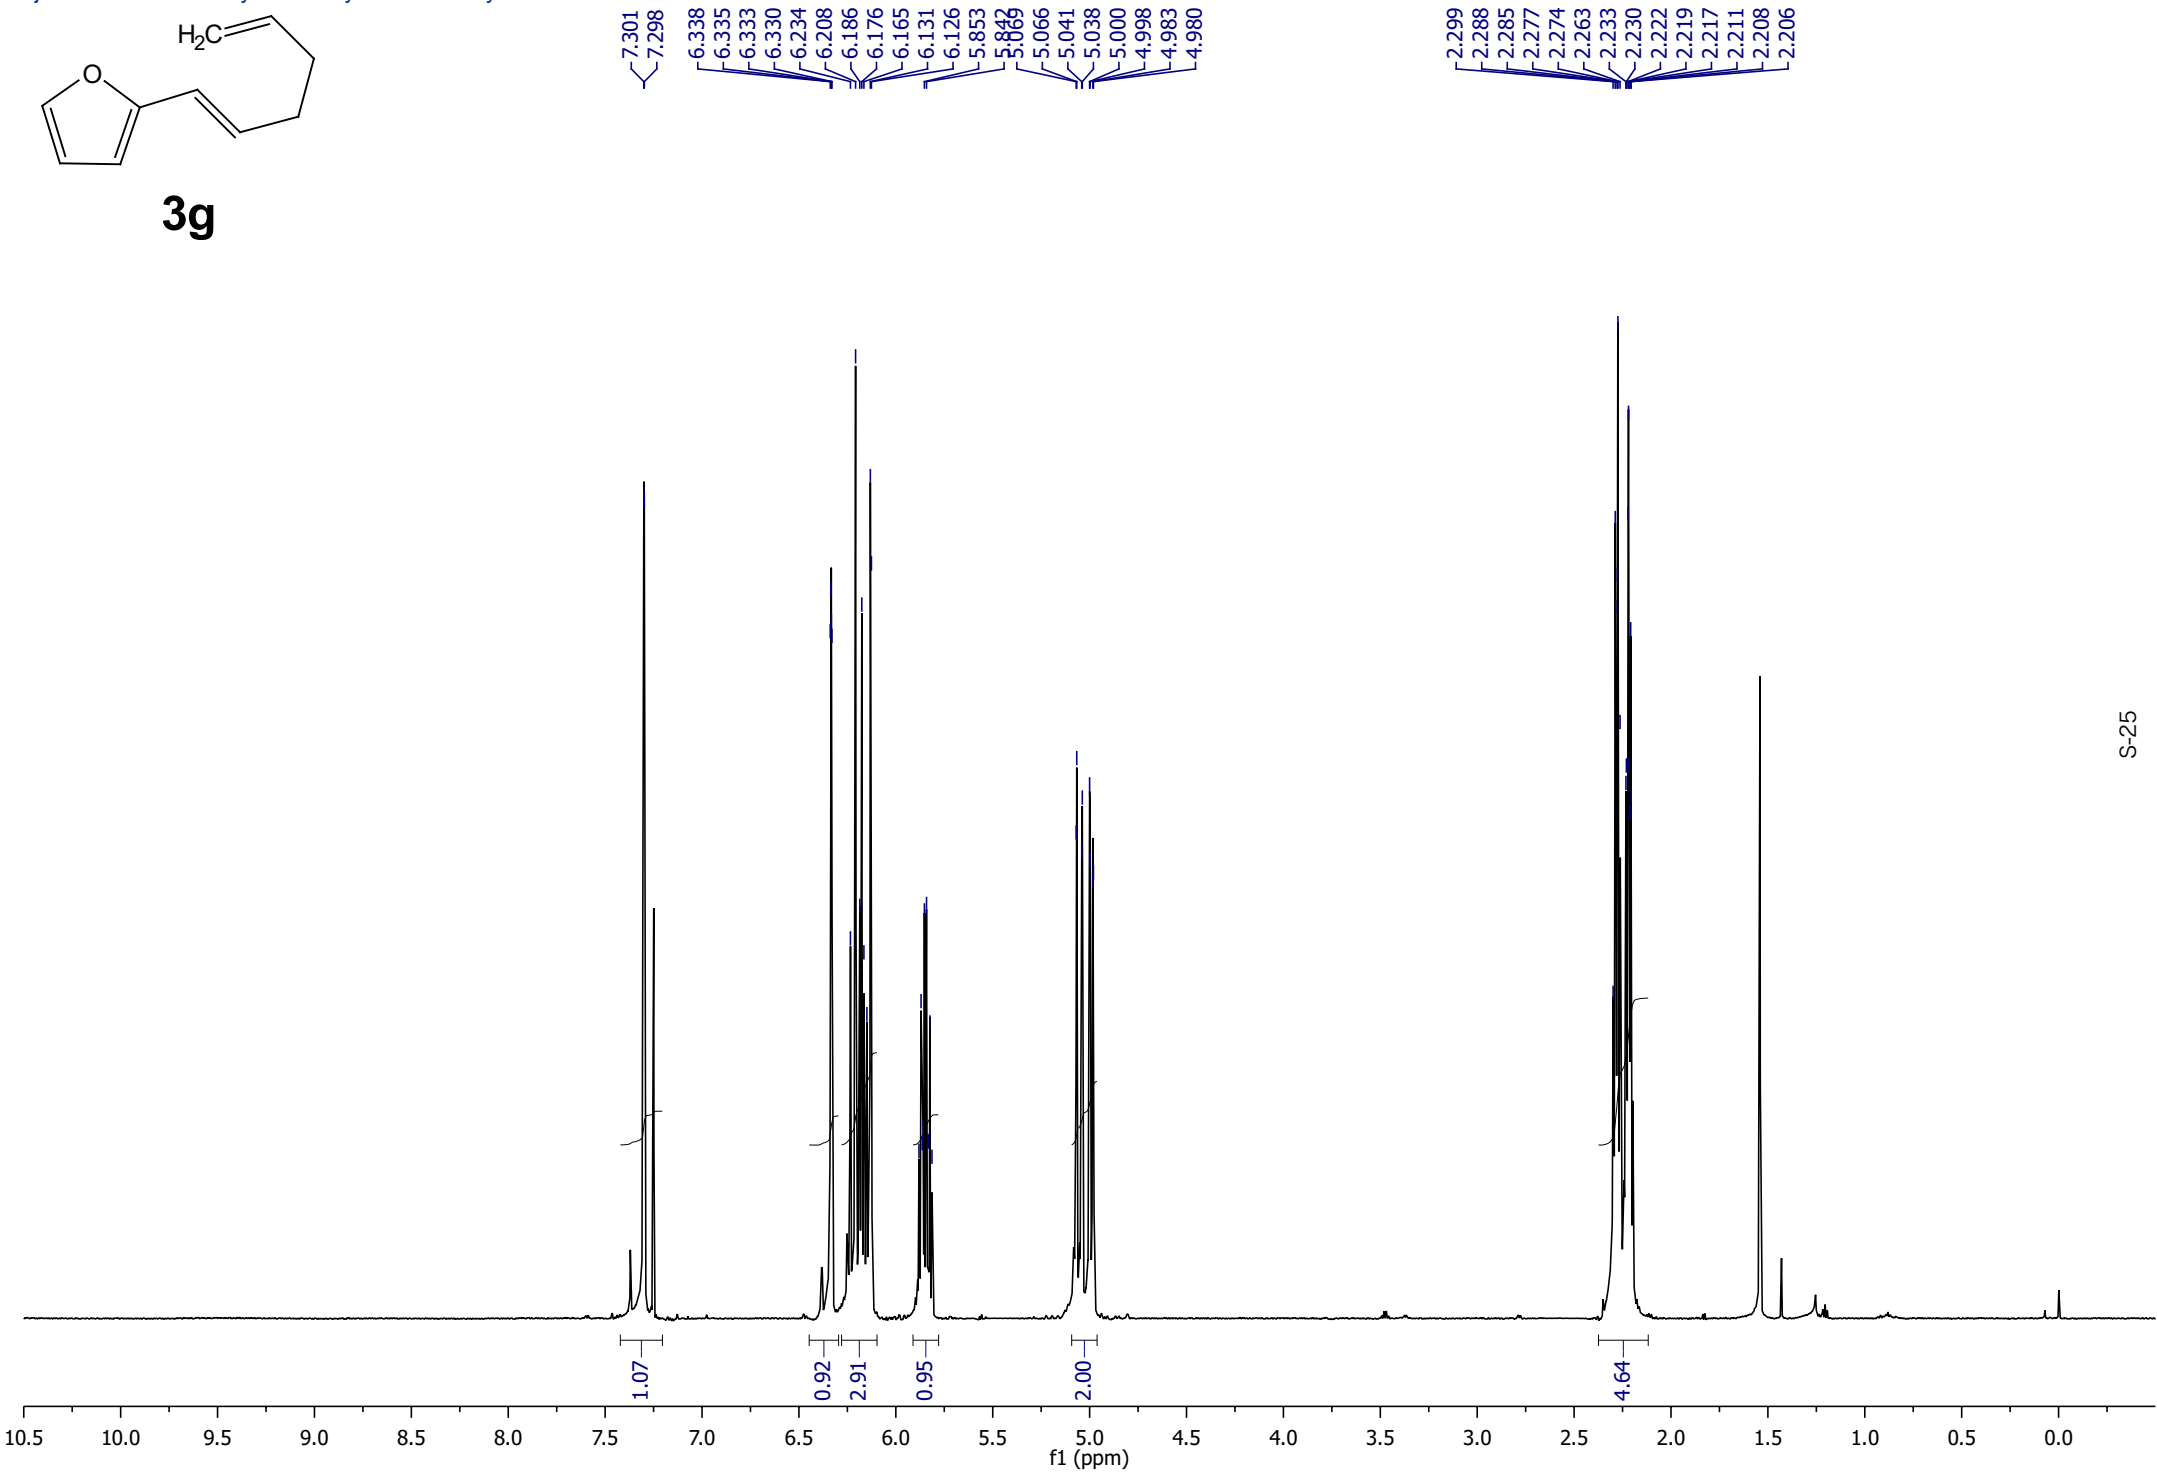

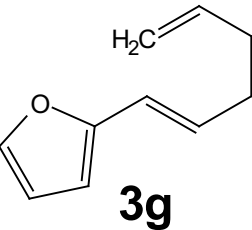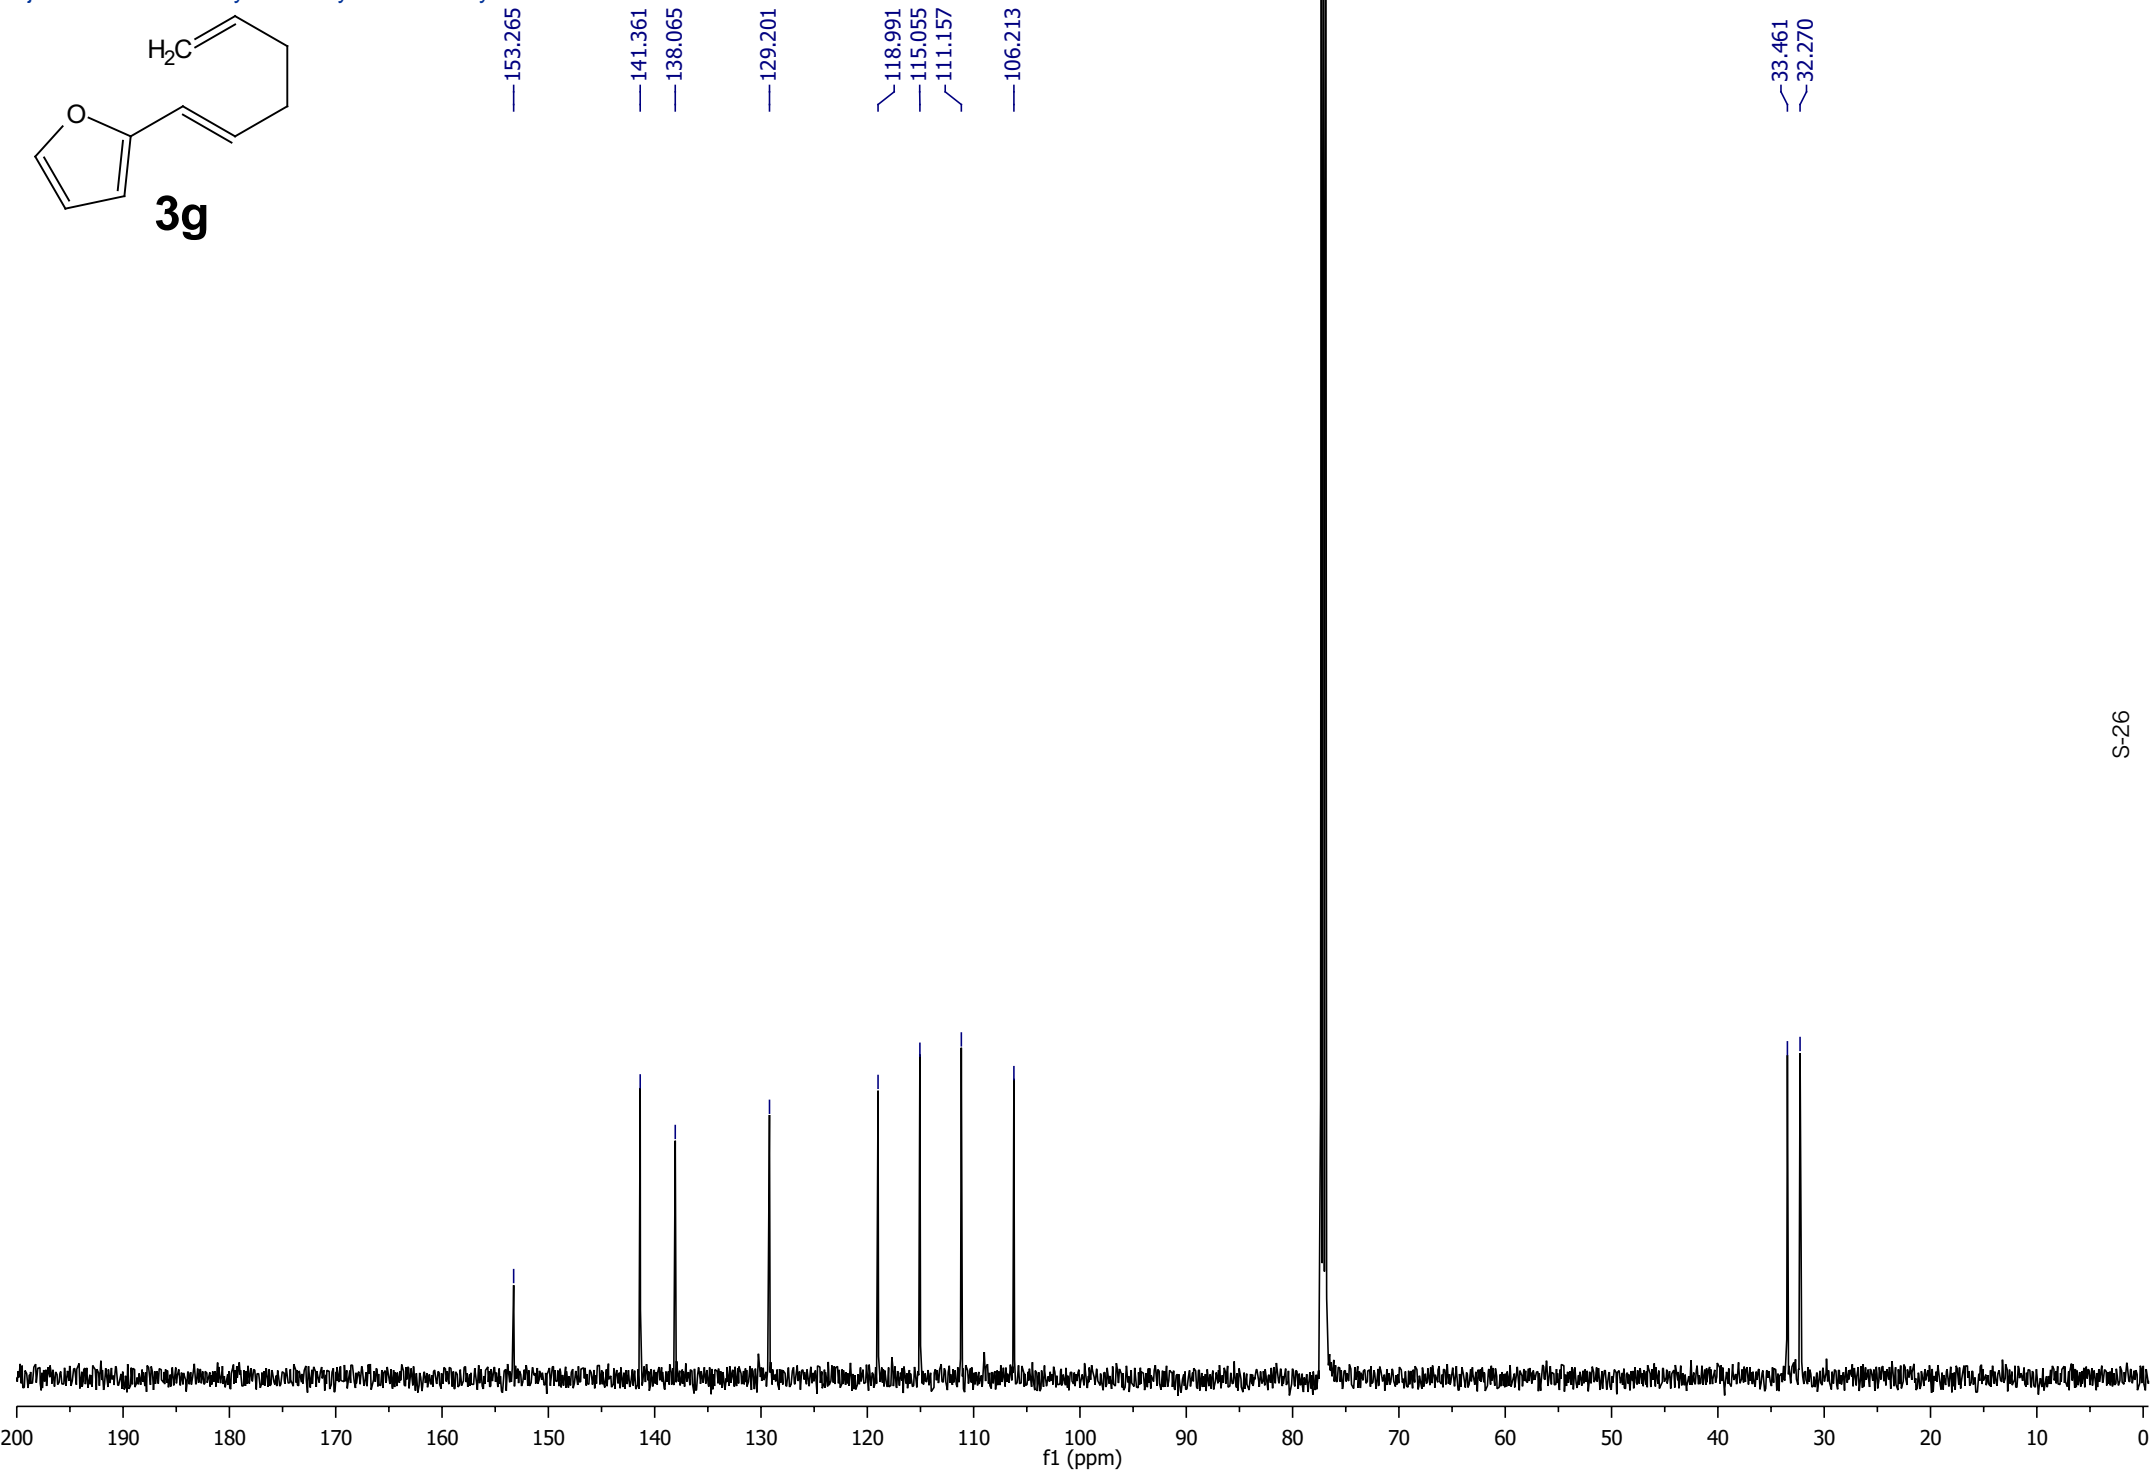

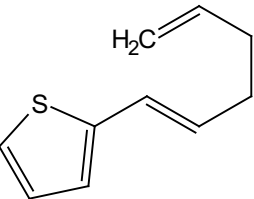

**3h**

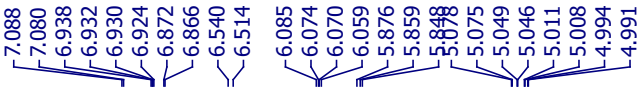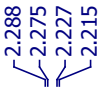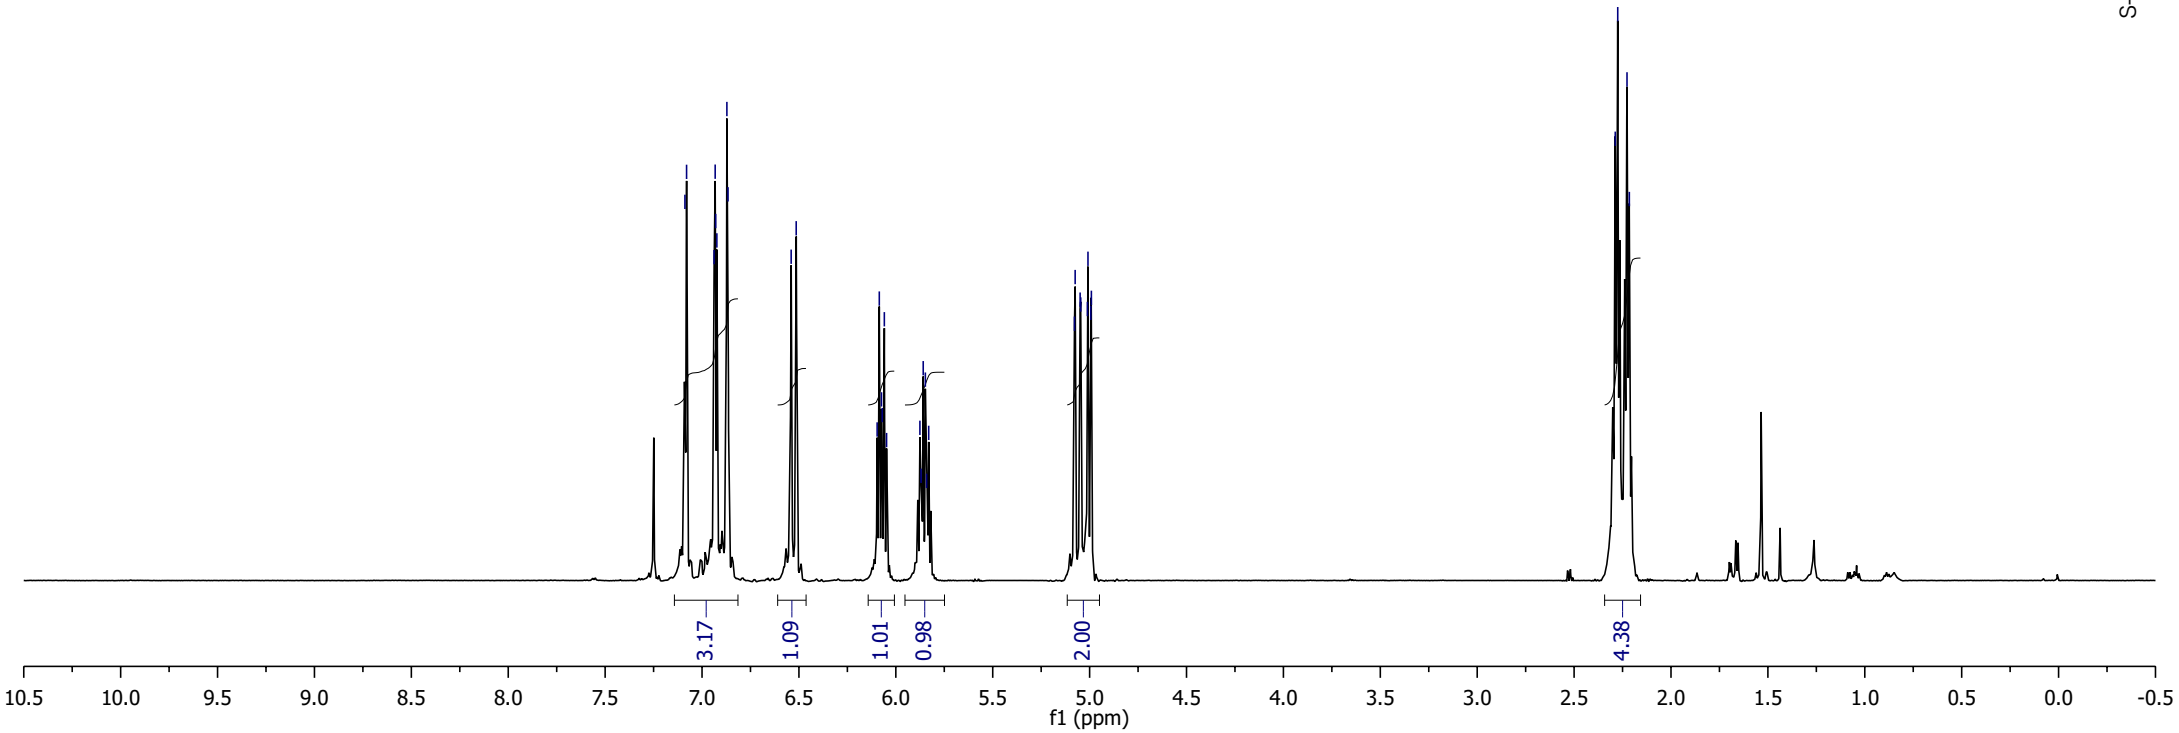

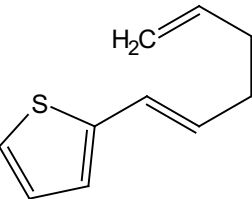

**3h**

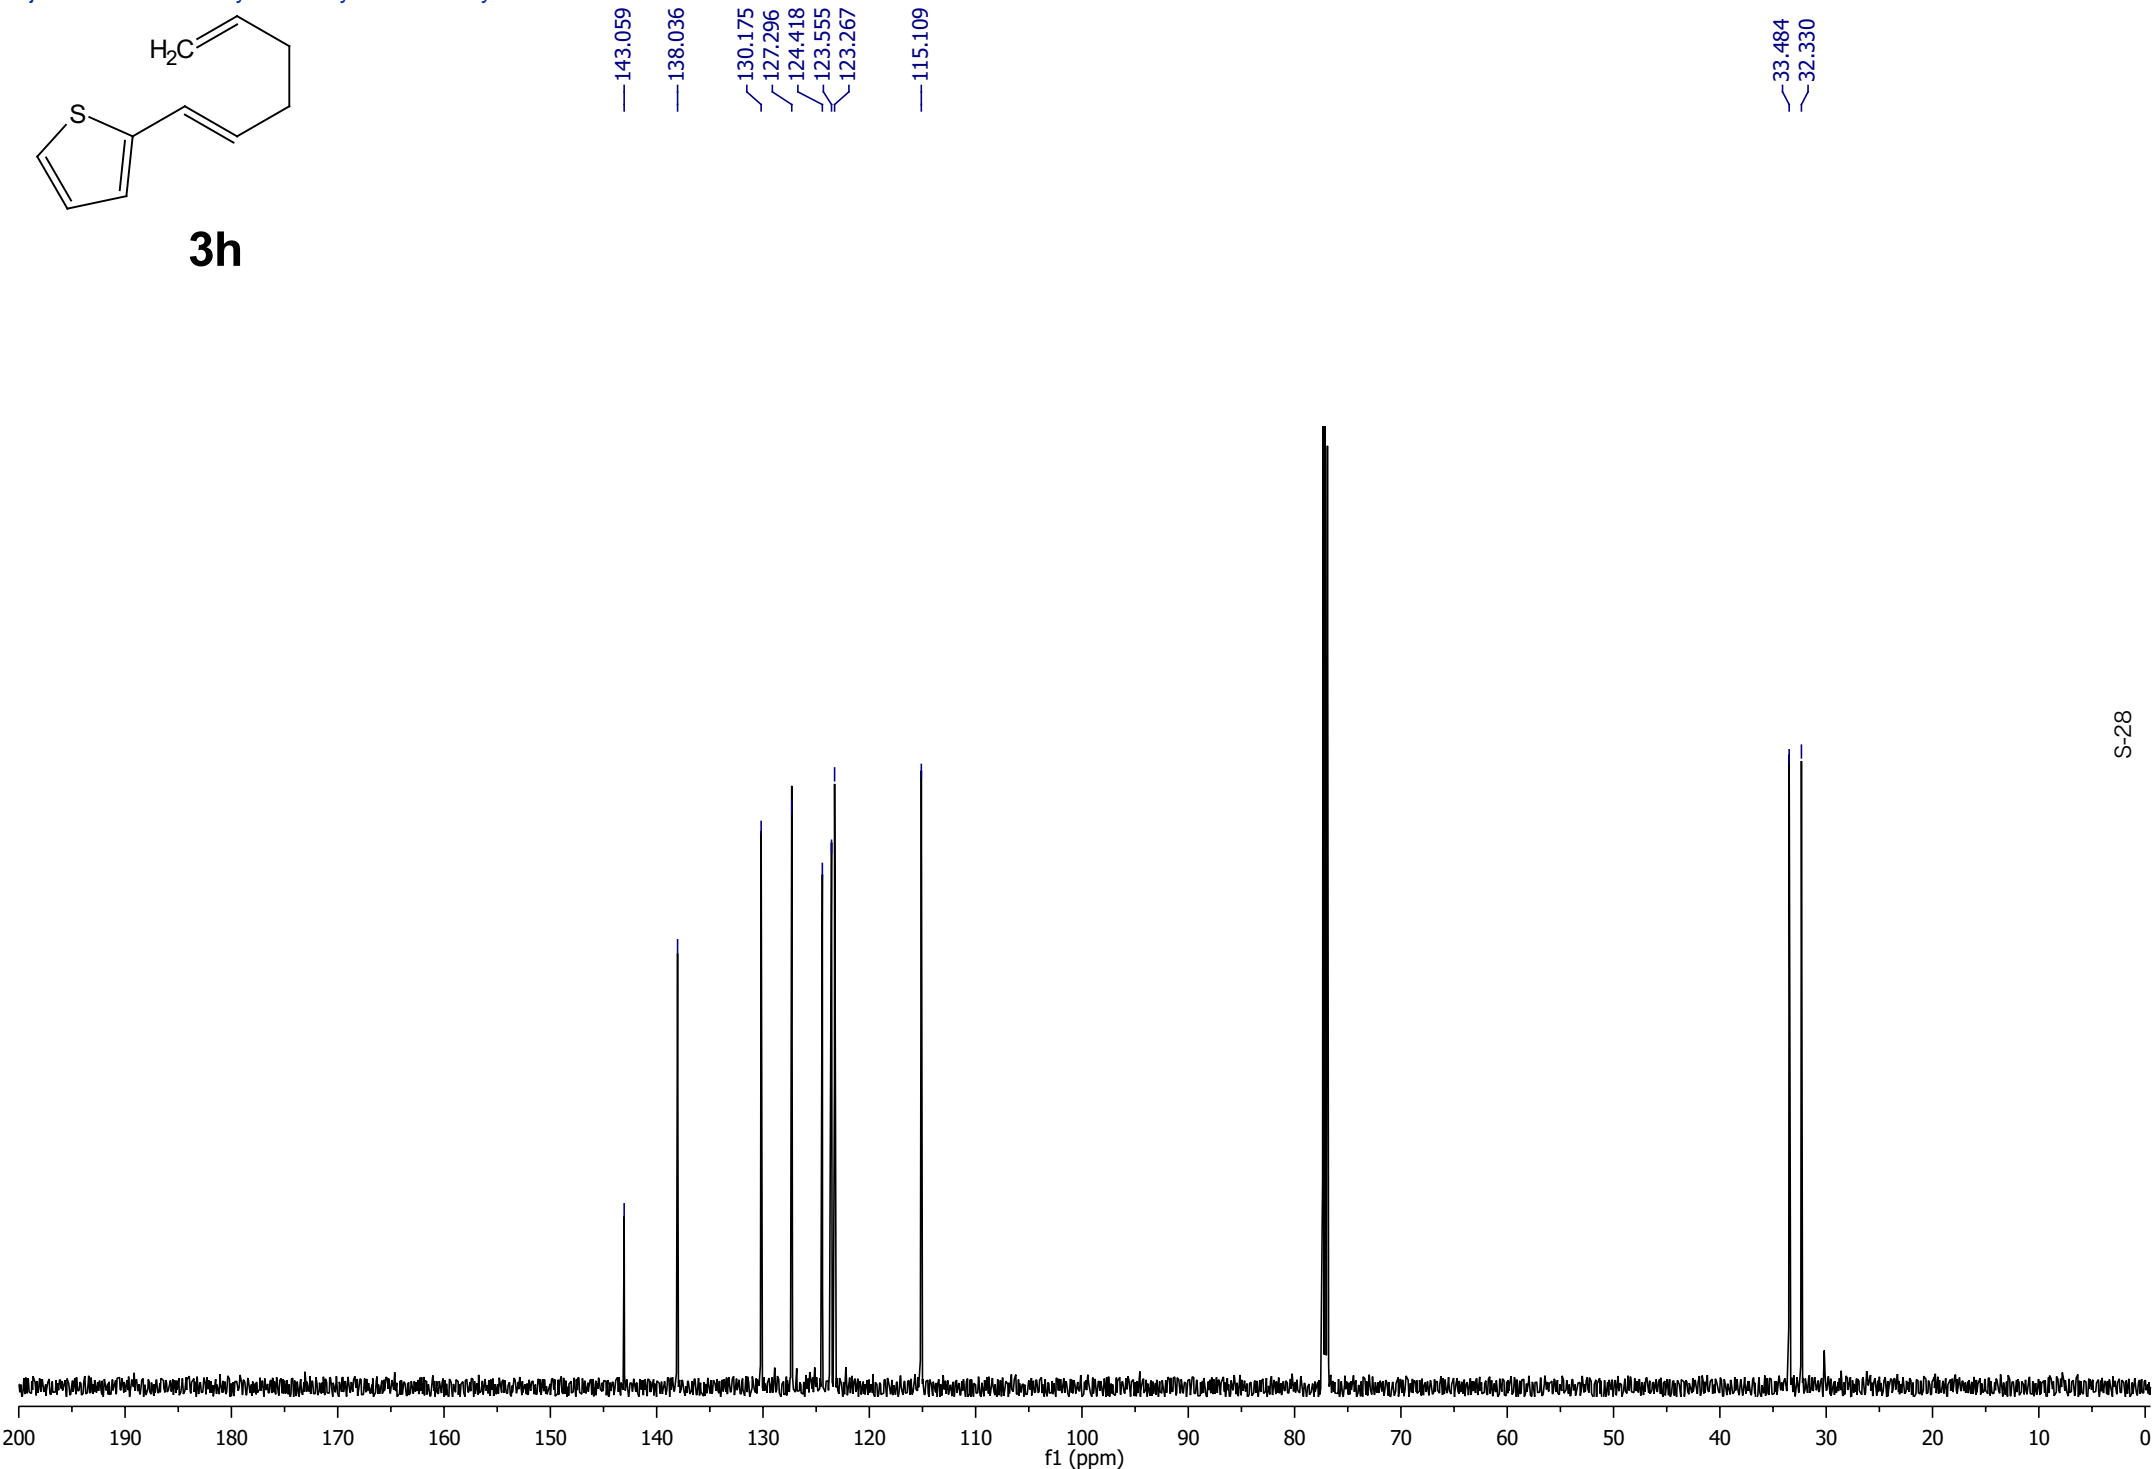

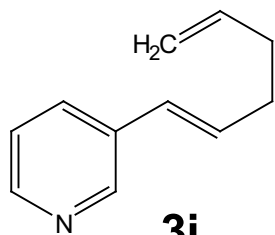

8.541  
8.537  
8.414  
8.411  
8.404  
8.401  
7.640  
7.636  
7.624  
7.620  
7.203  
7.193  
7.187  
7.177  
6.383  
6.351  
6.309  
6.296  
6.283  
5.867  
5.846  
5.833  
5.812  
5.078  
5.074  
5.071  
5.068  
5.044  
5.040  
5.037  
5.033  
5.009  
5.006  
4.991  
4.988  
4.985  
2.336  
2.333  
2.322  
2.320  
2.307  
2.244  
2.240  
2.227

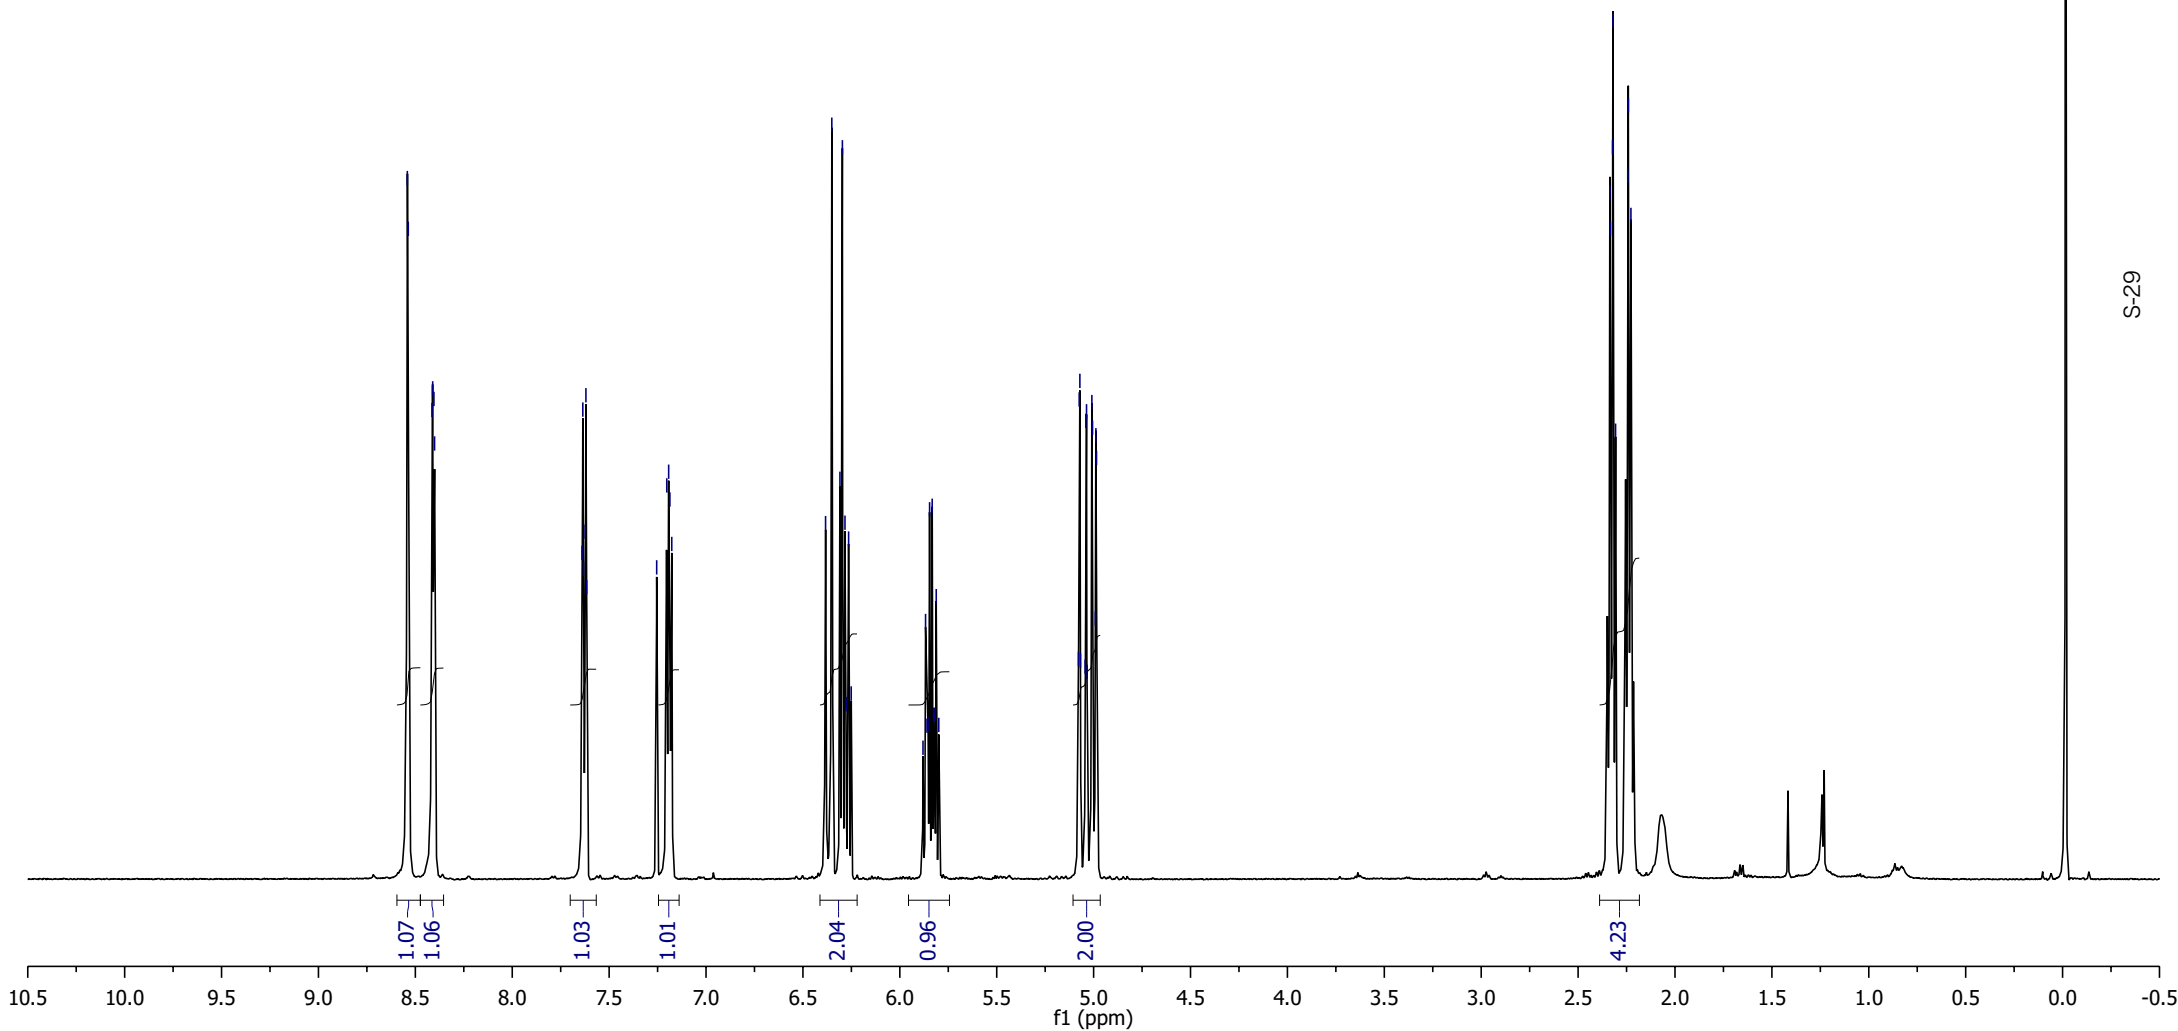

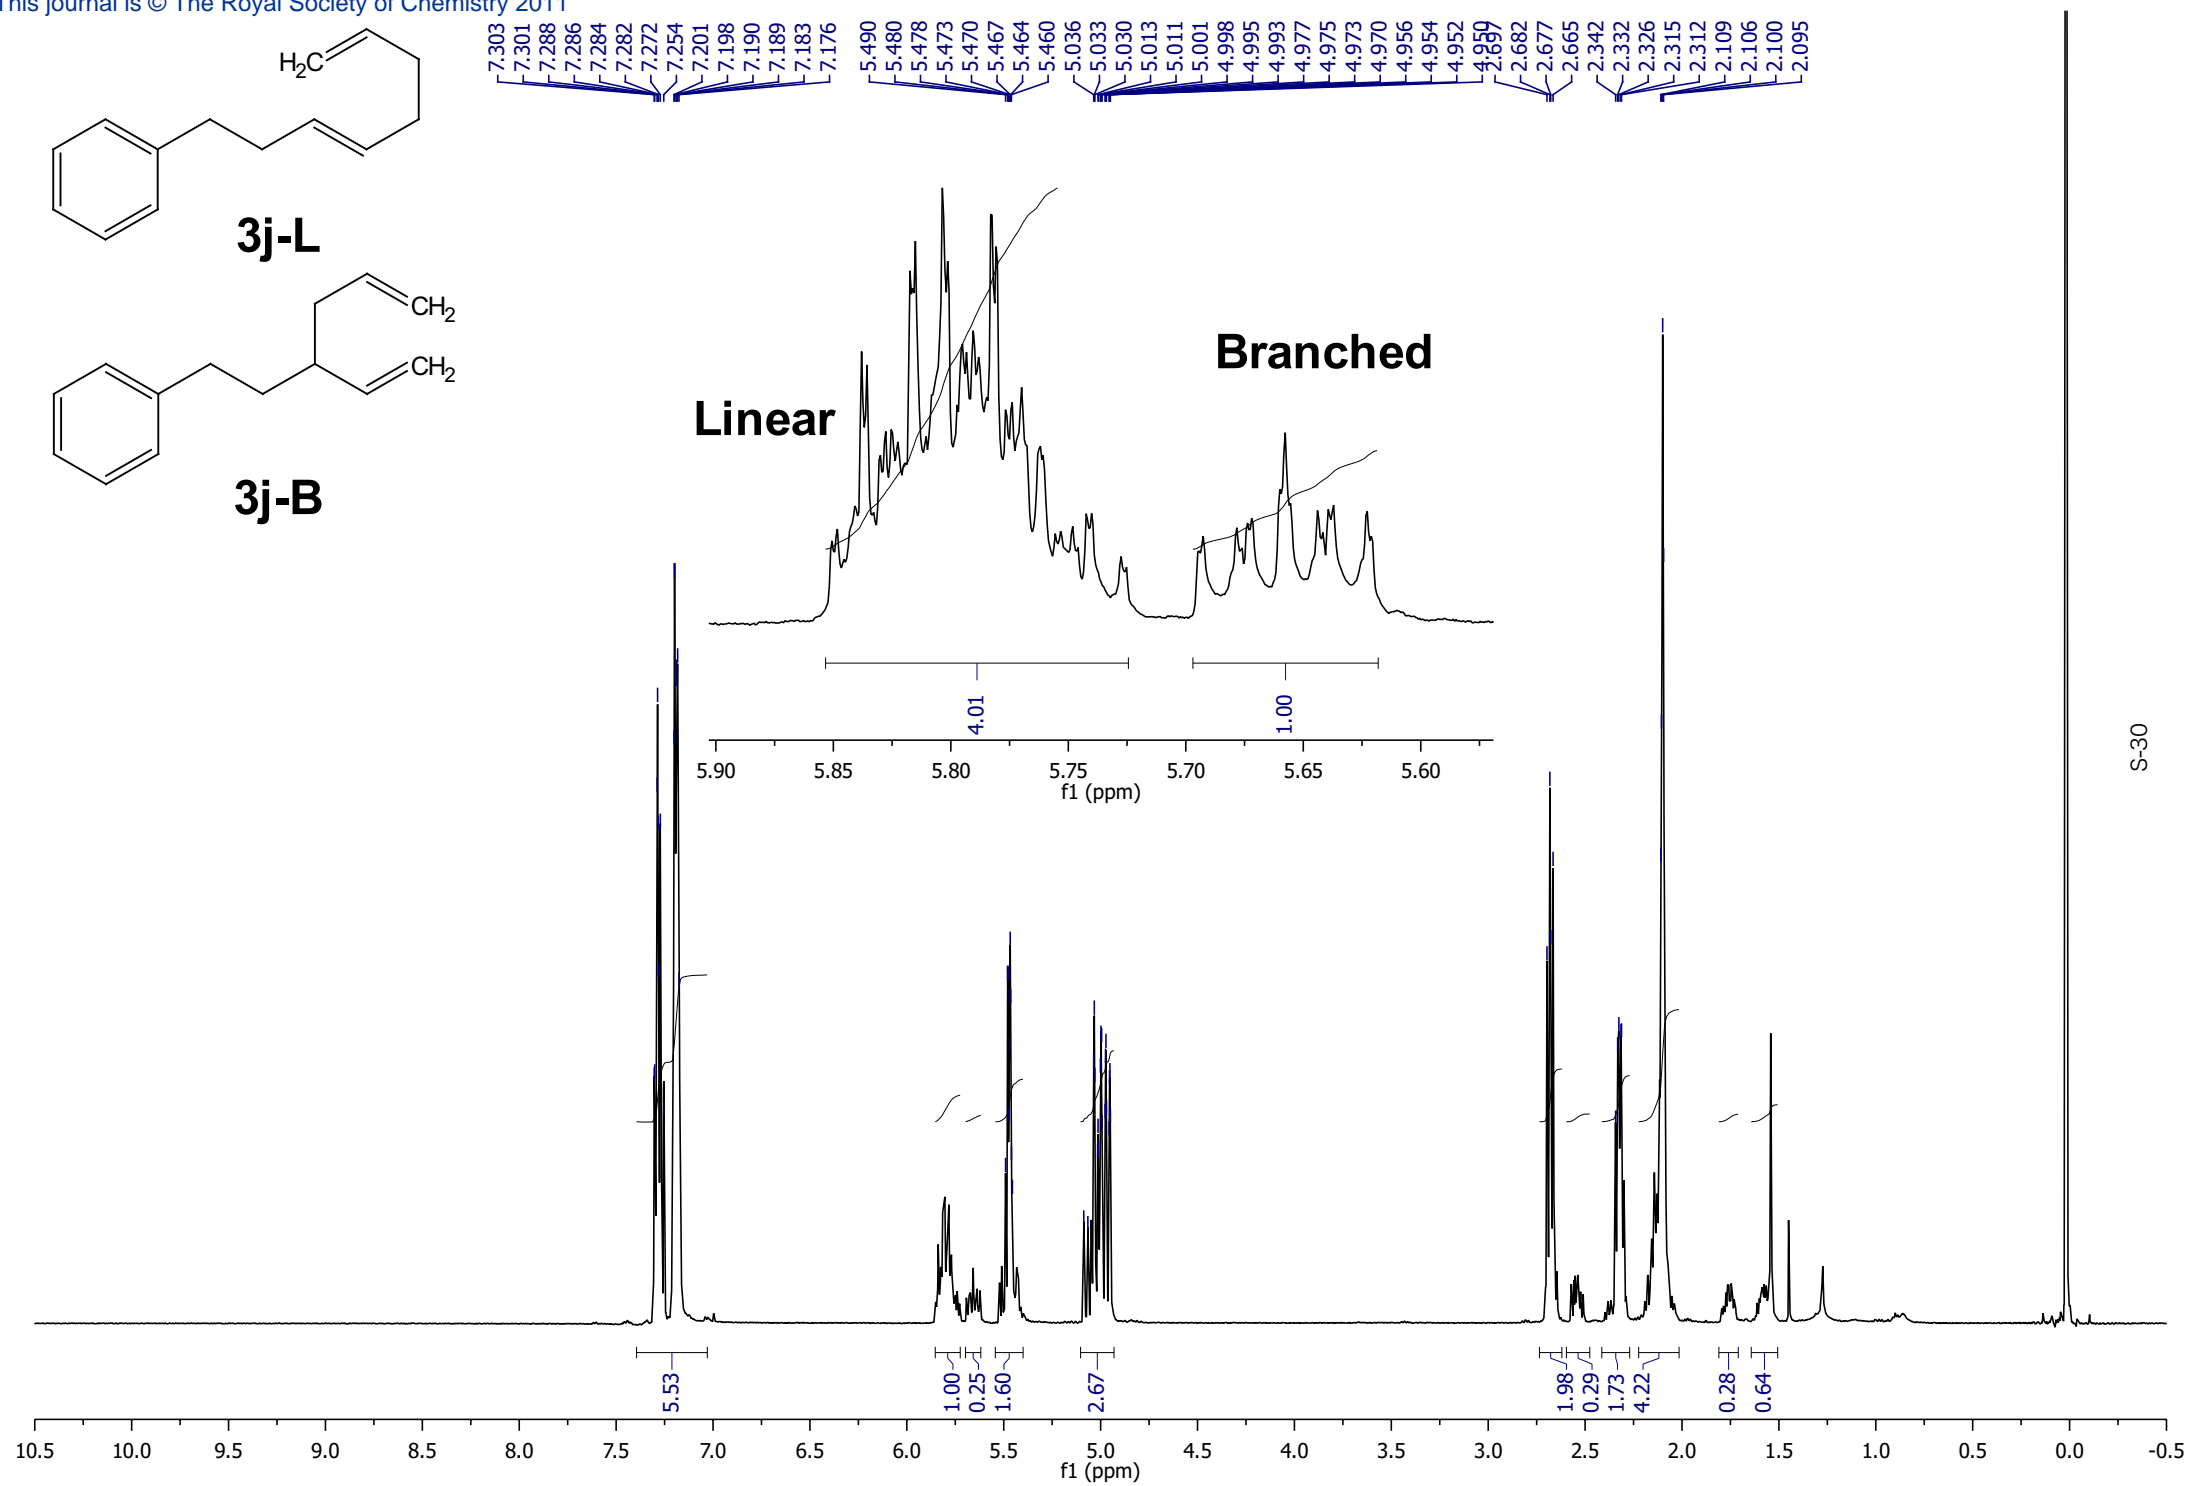

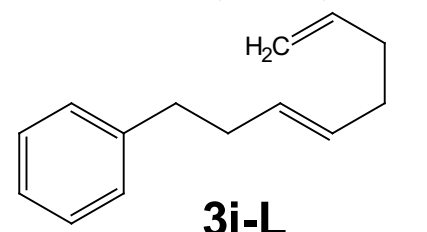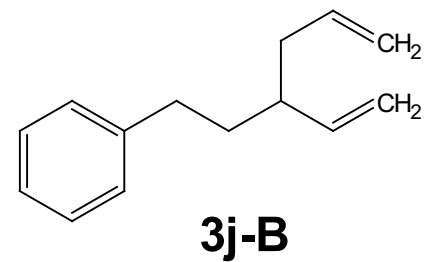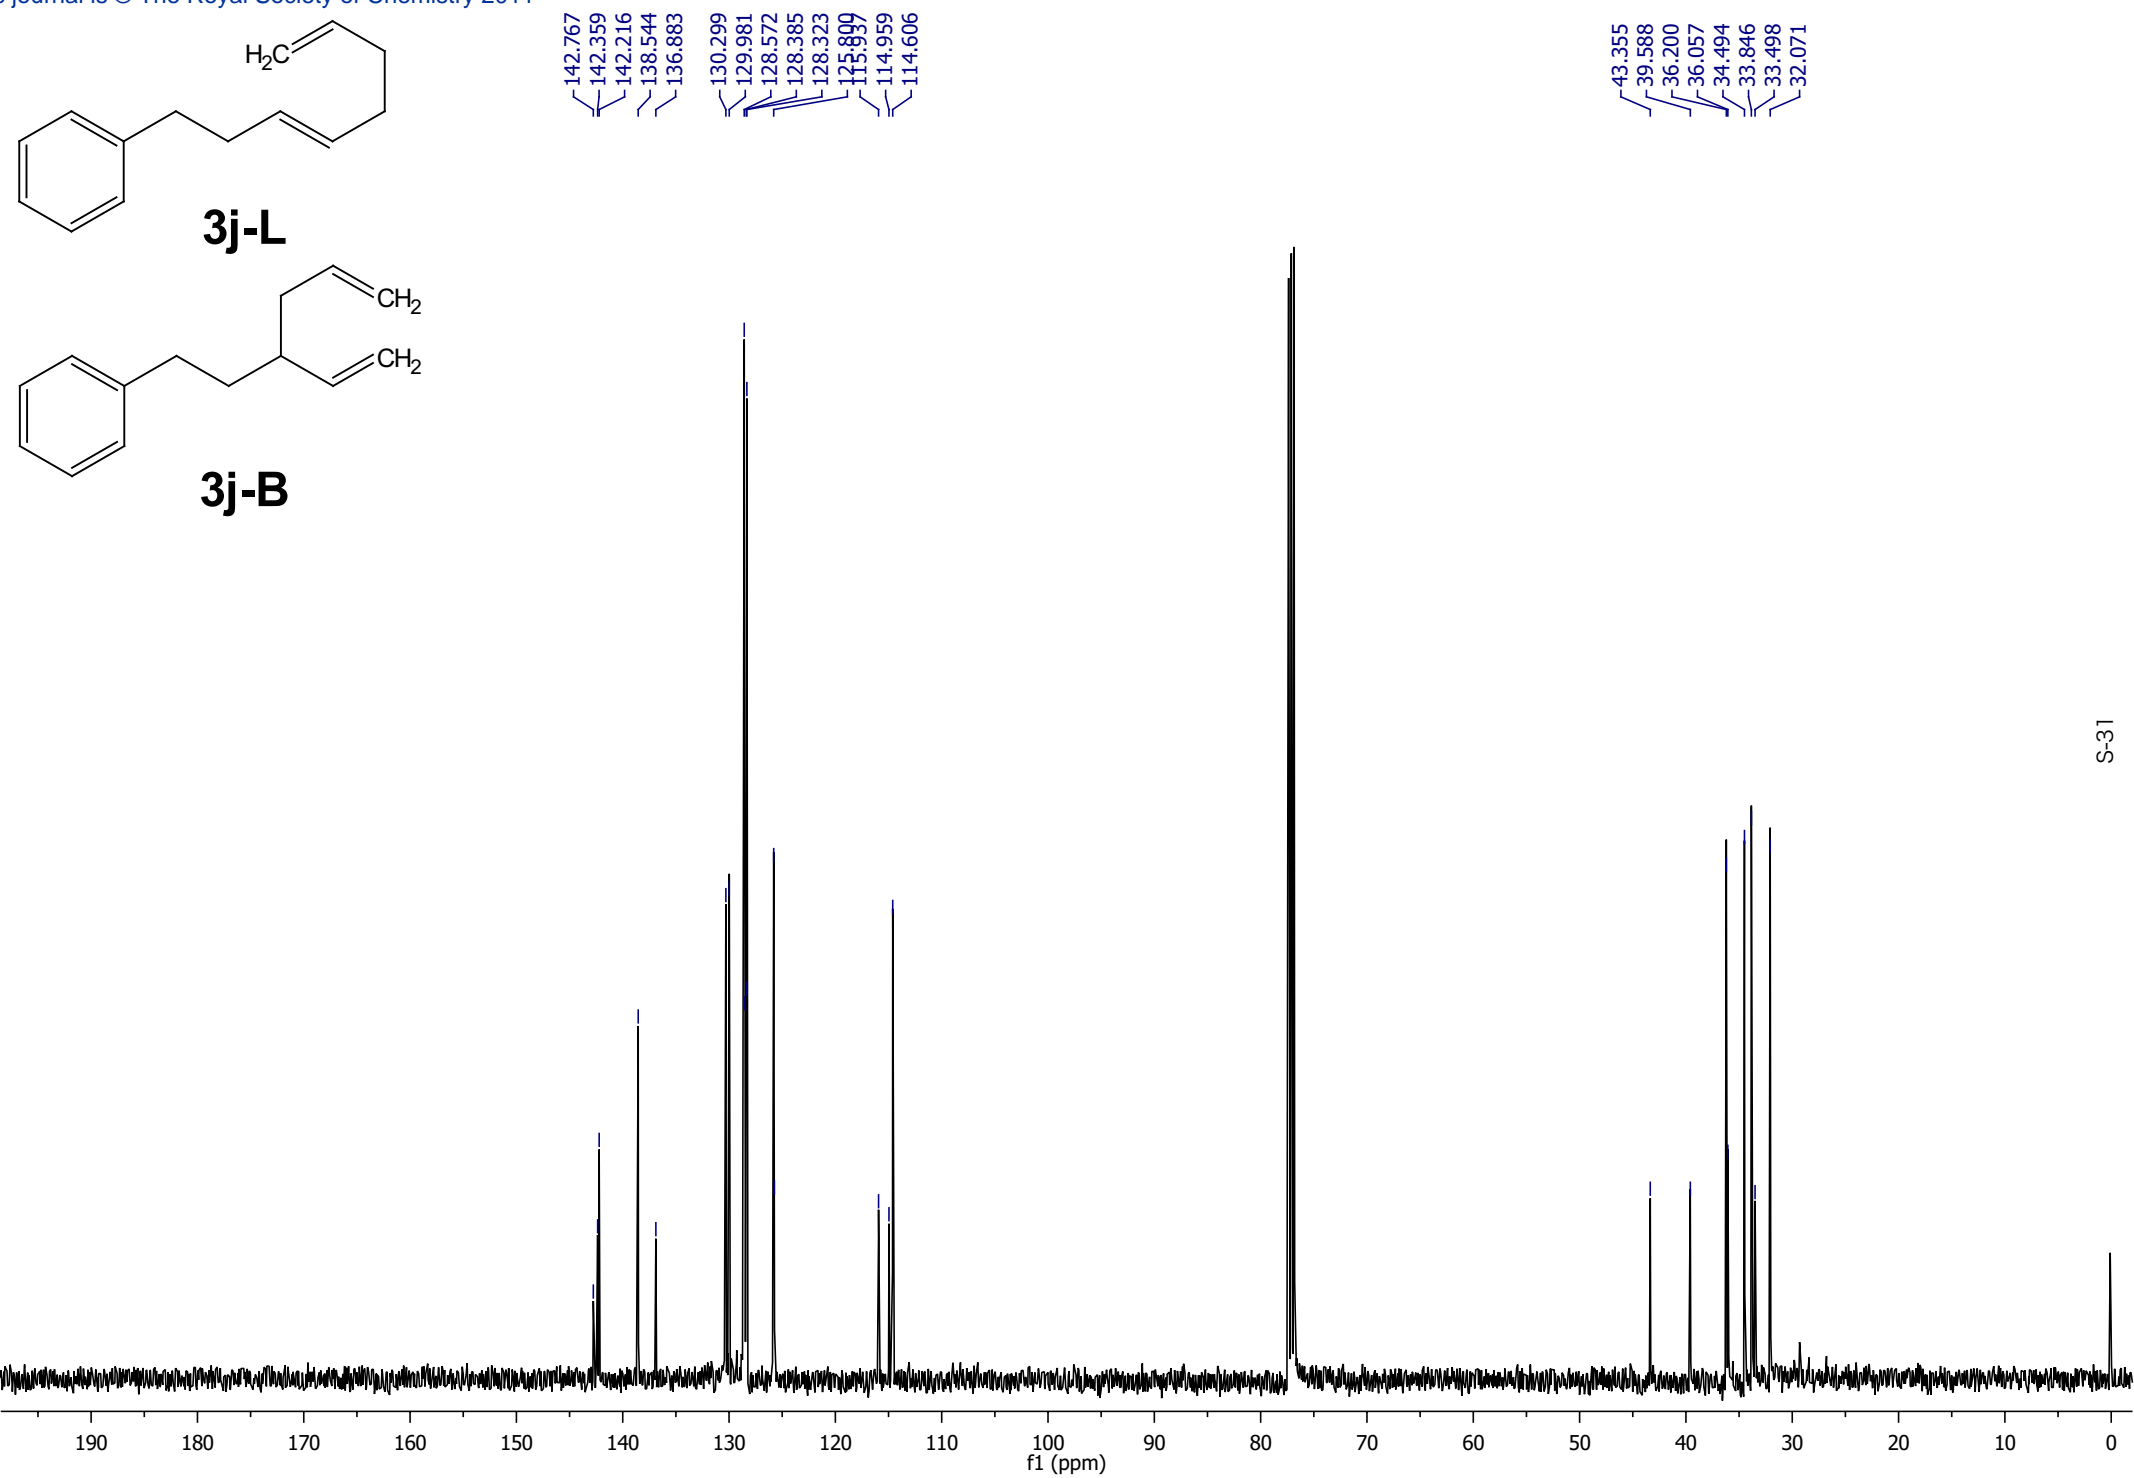

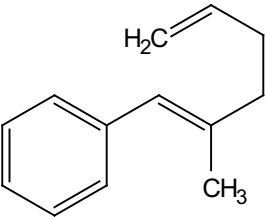

**3k**

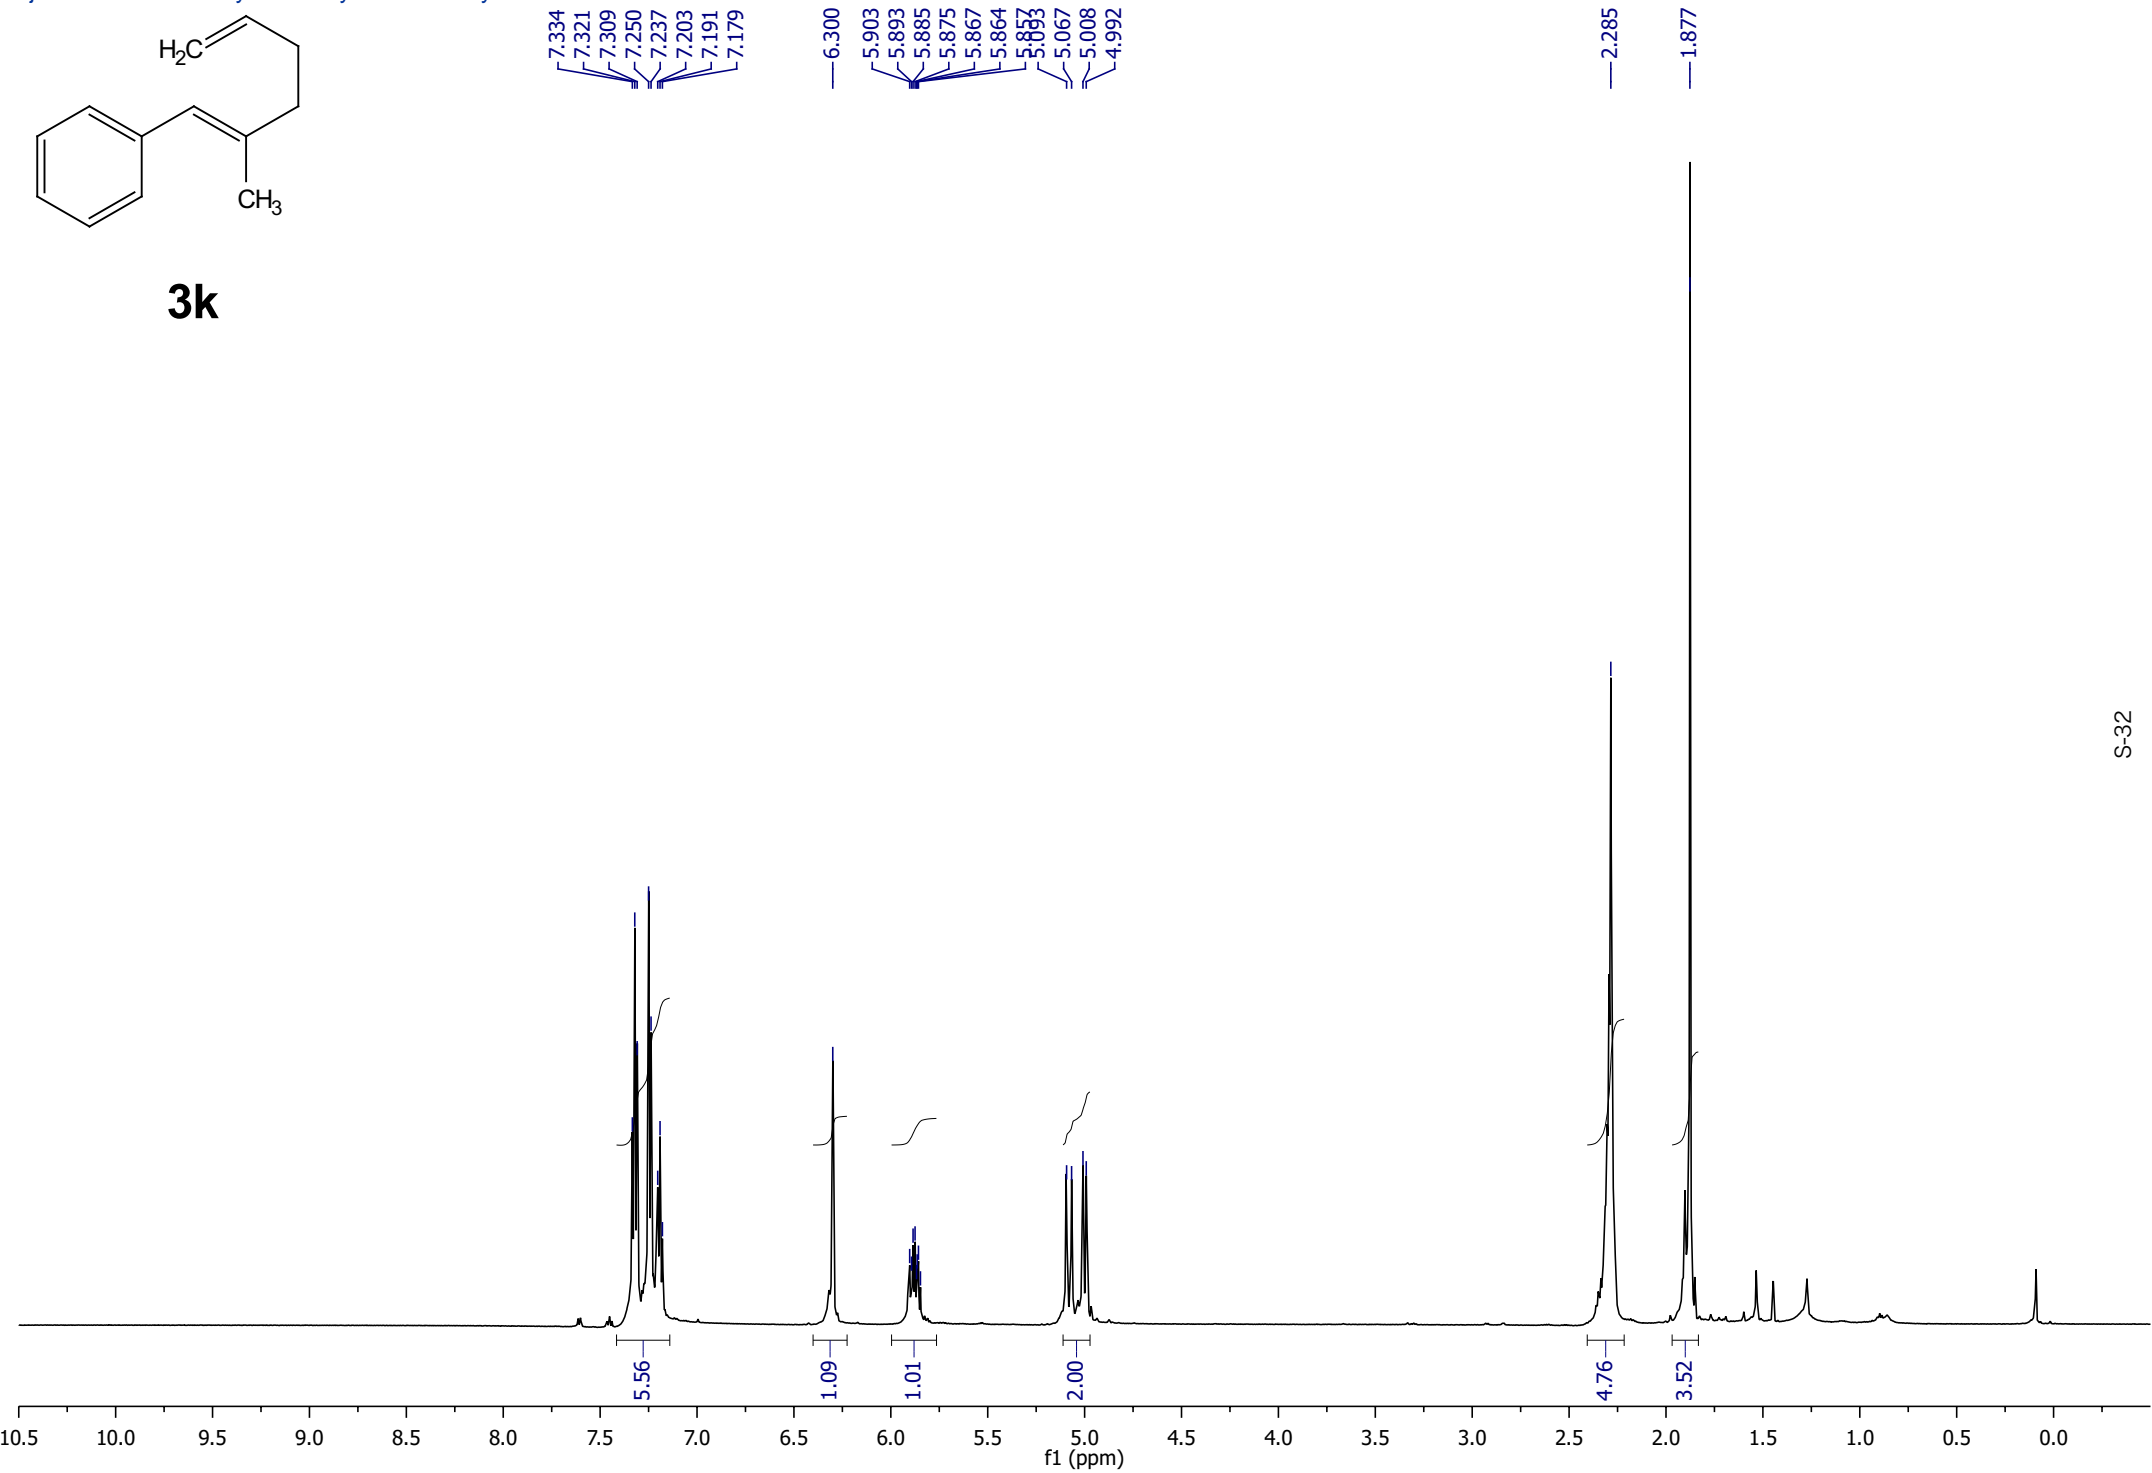





**3k**

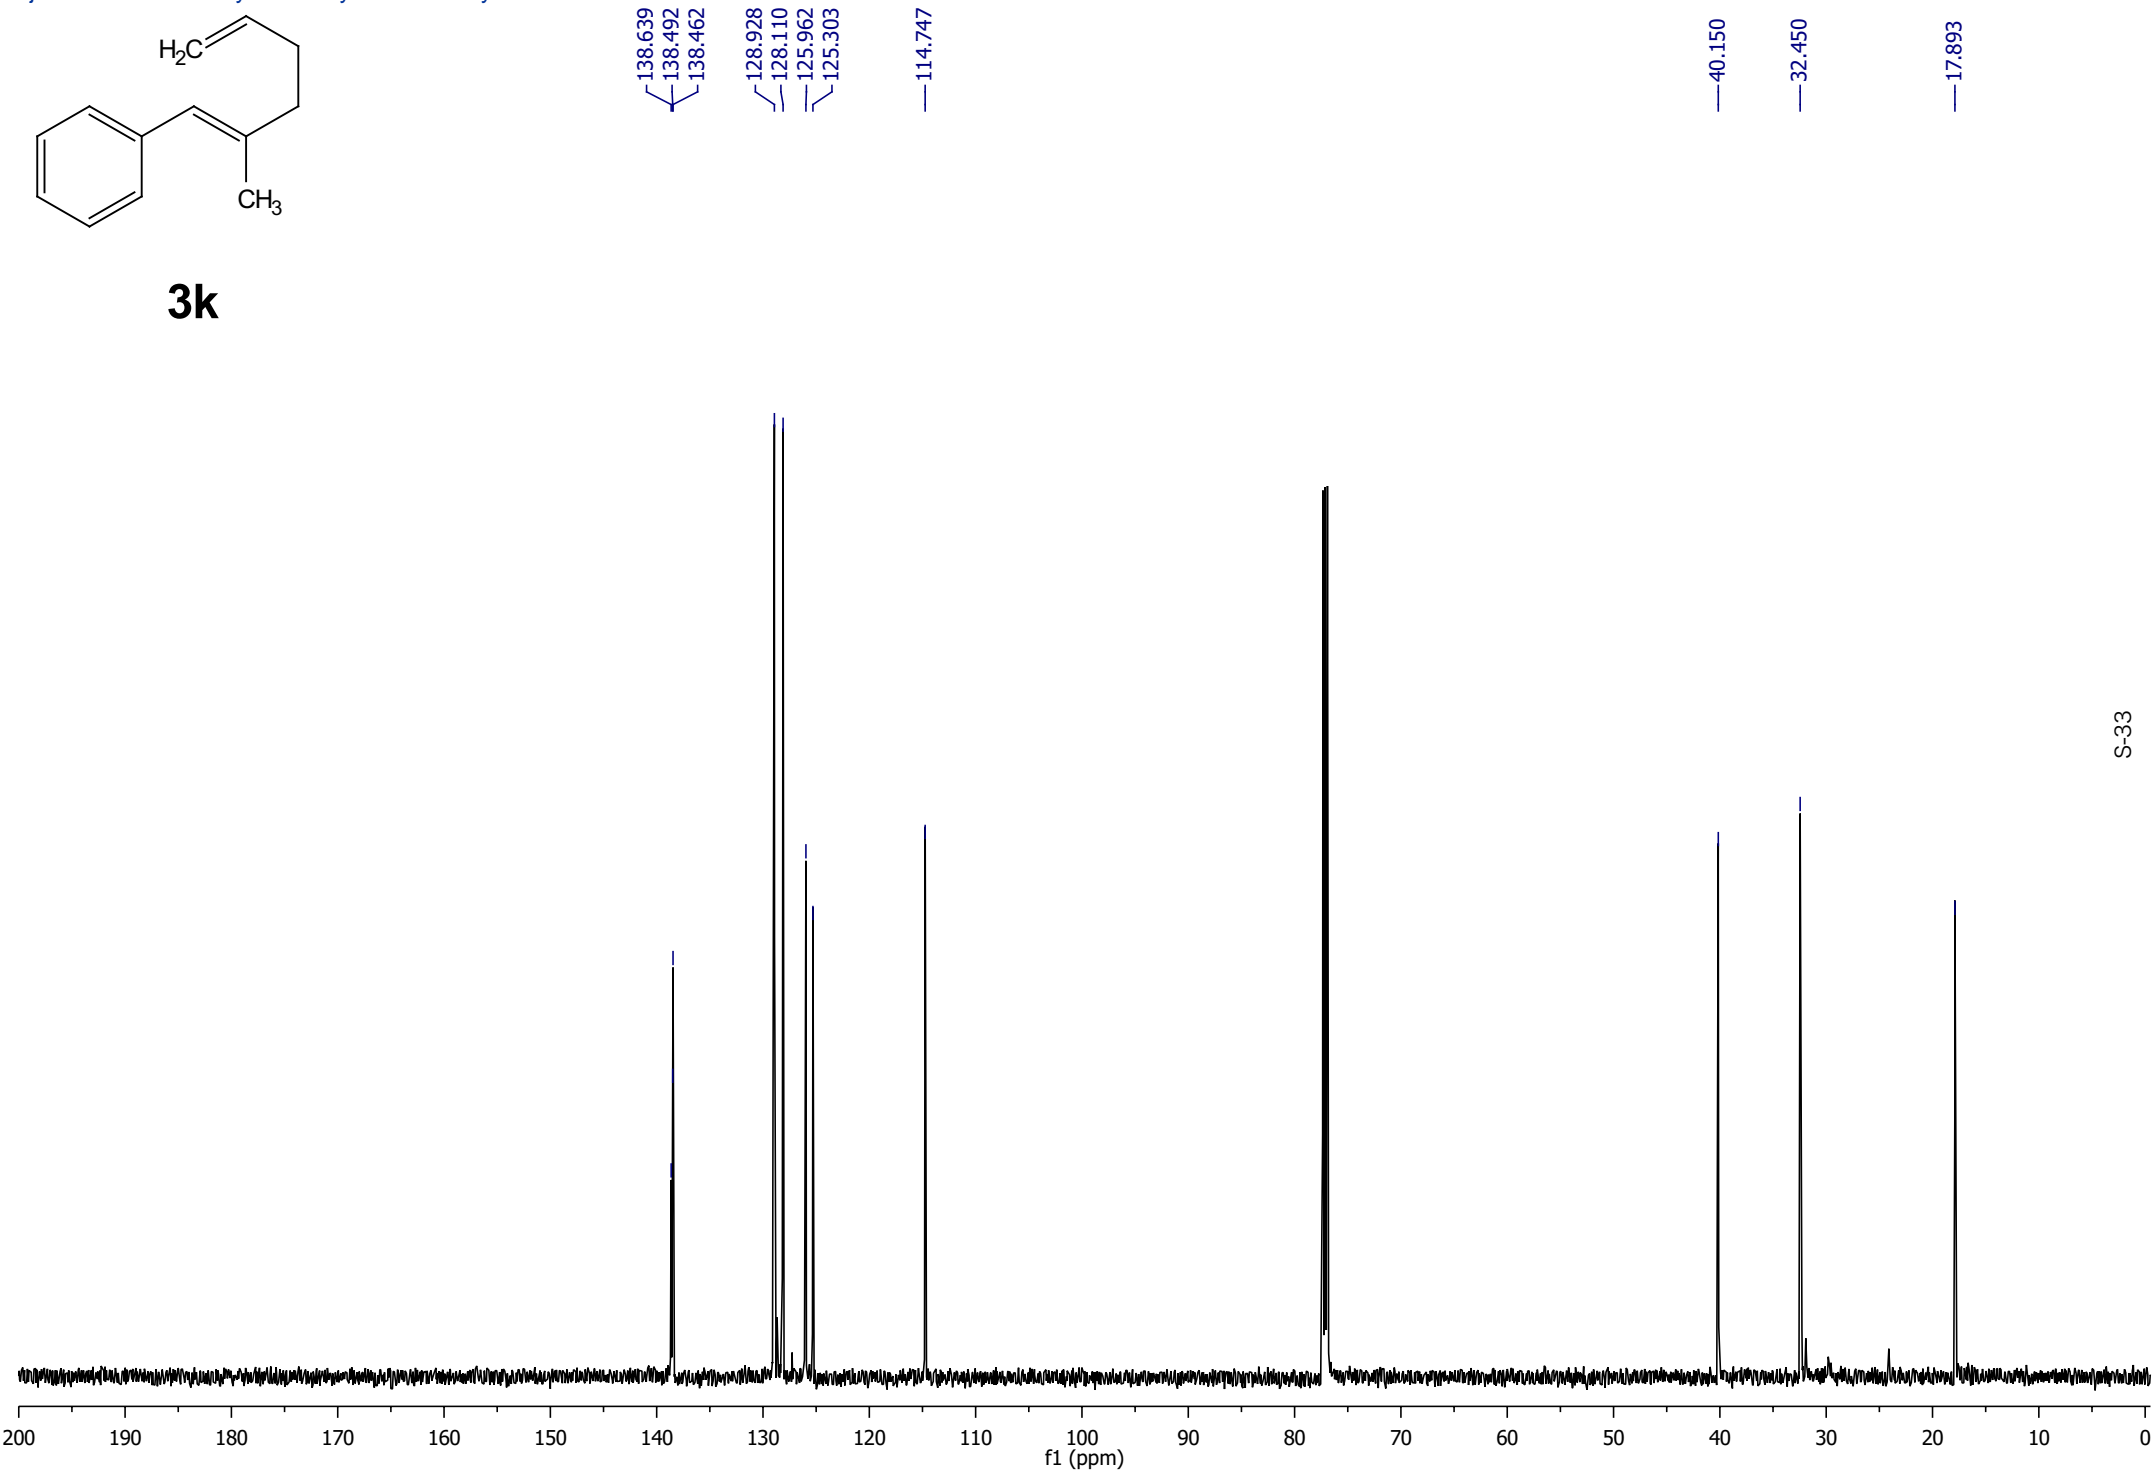

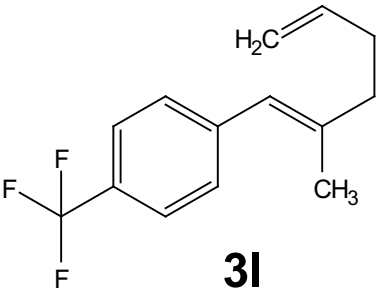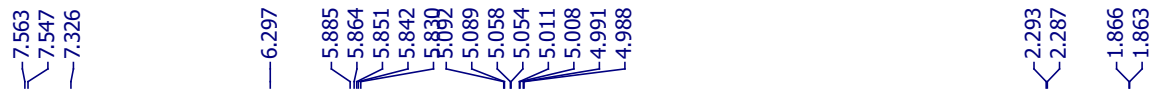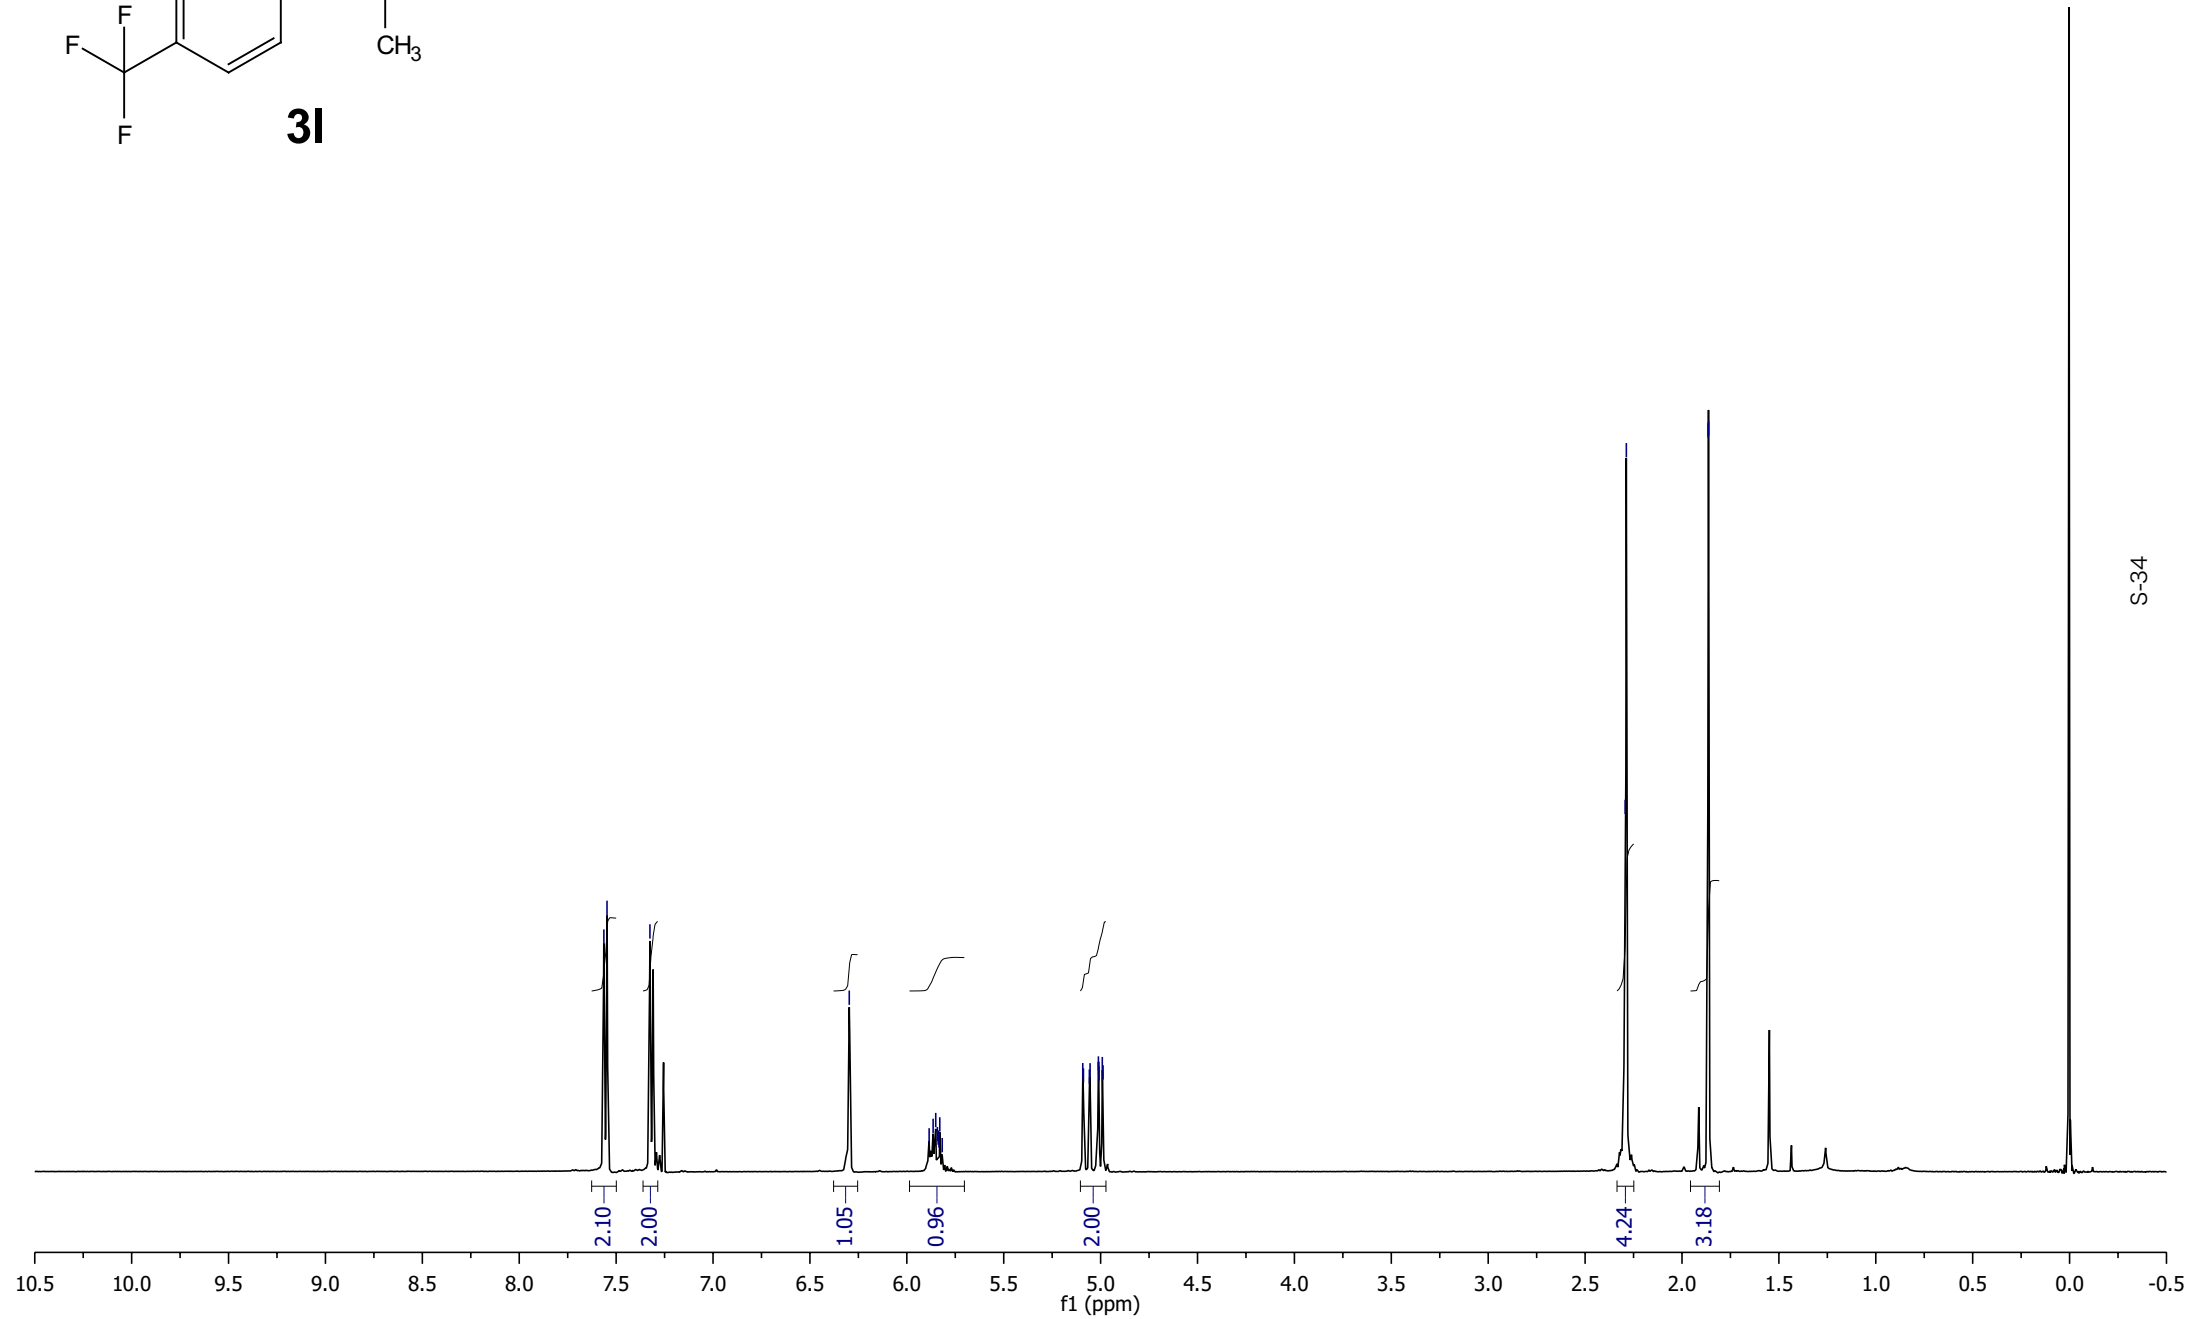

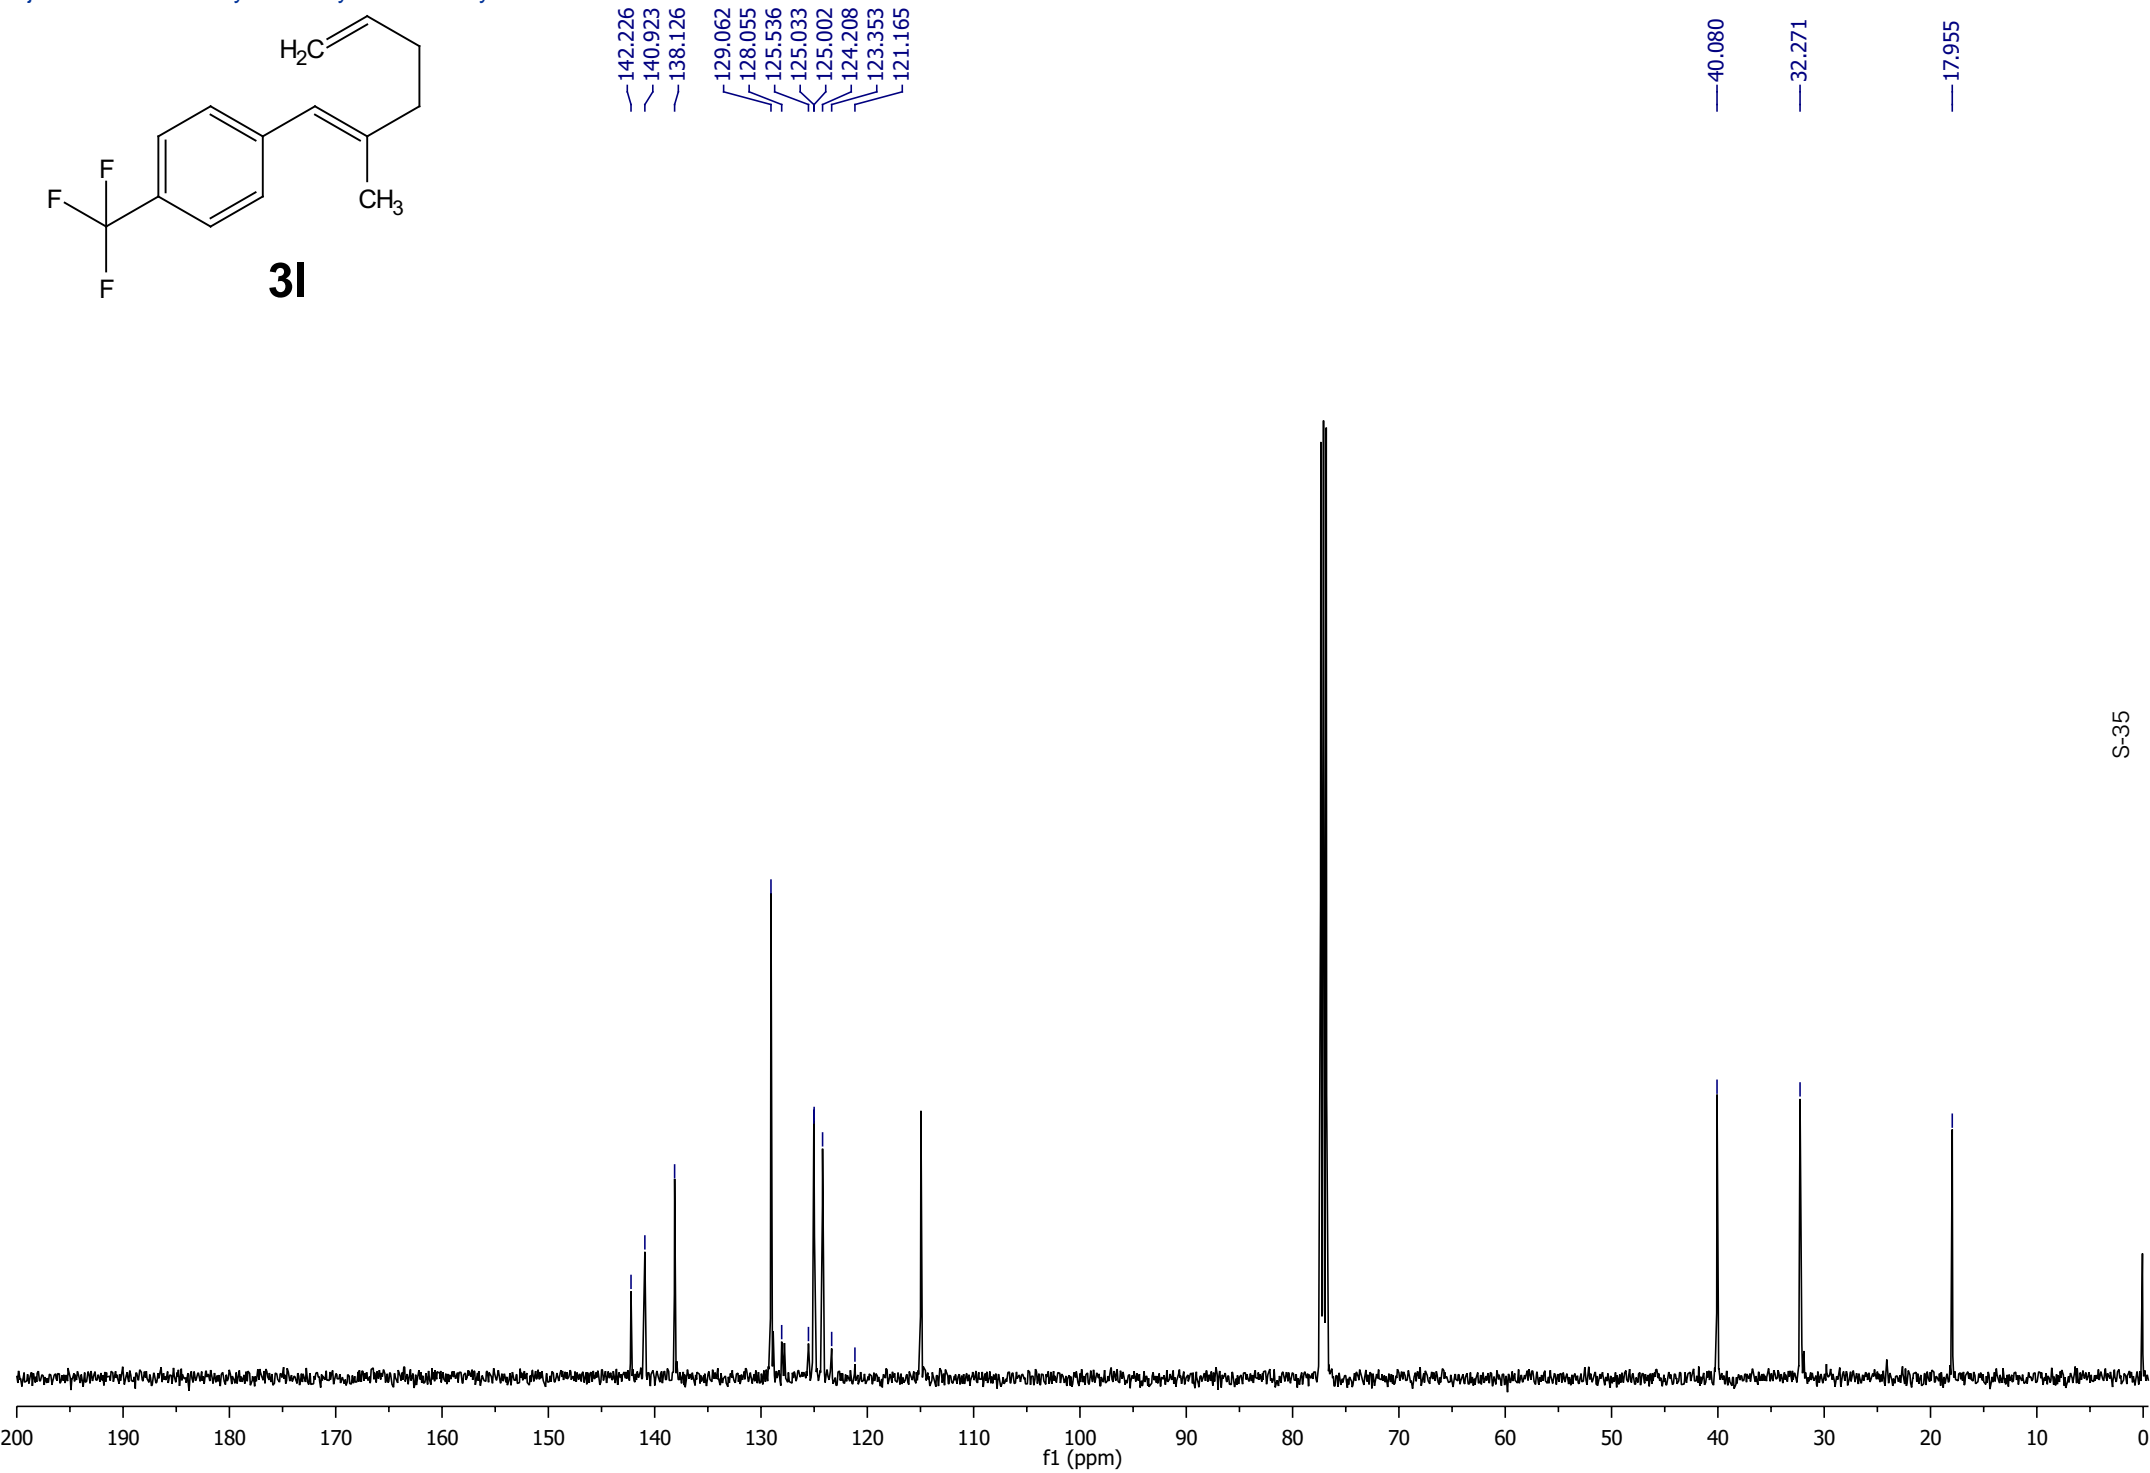

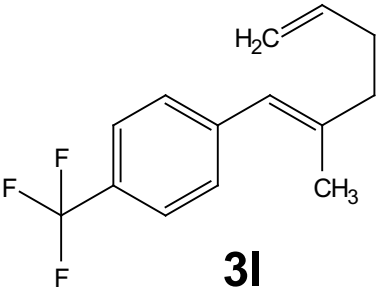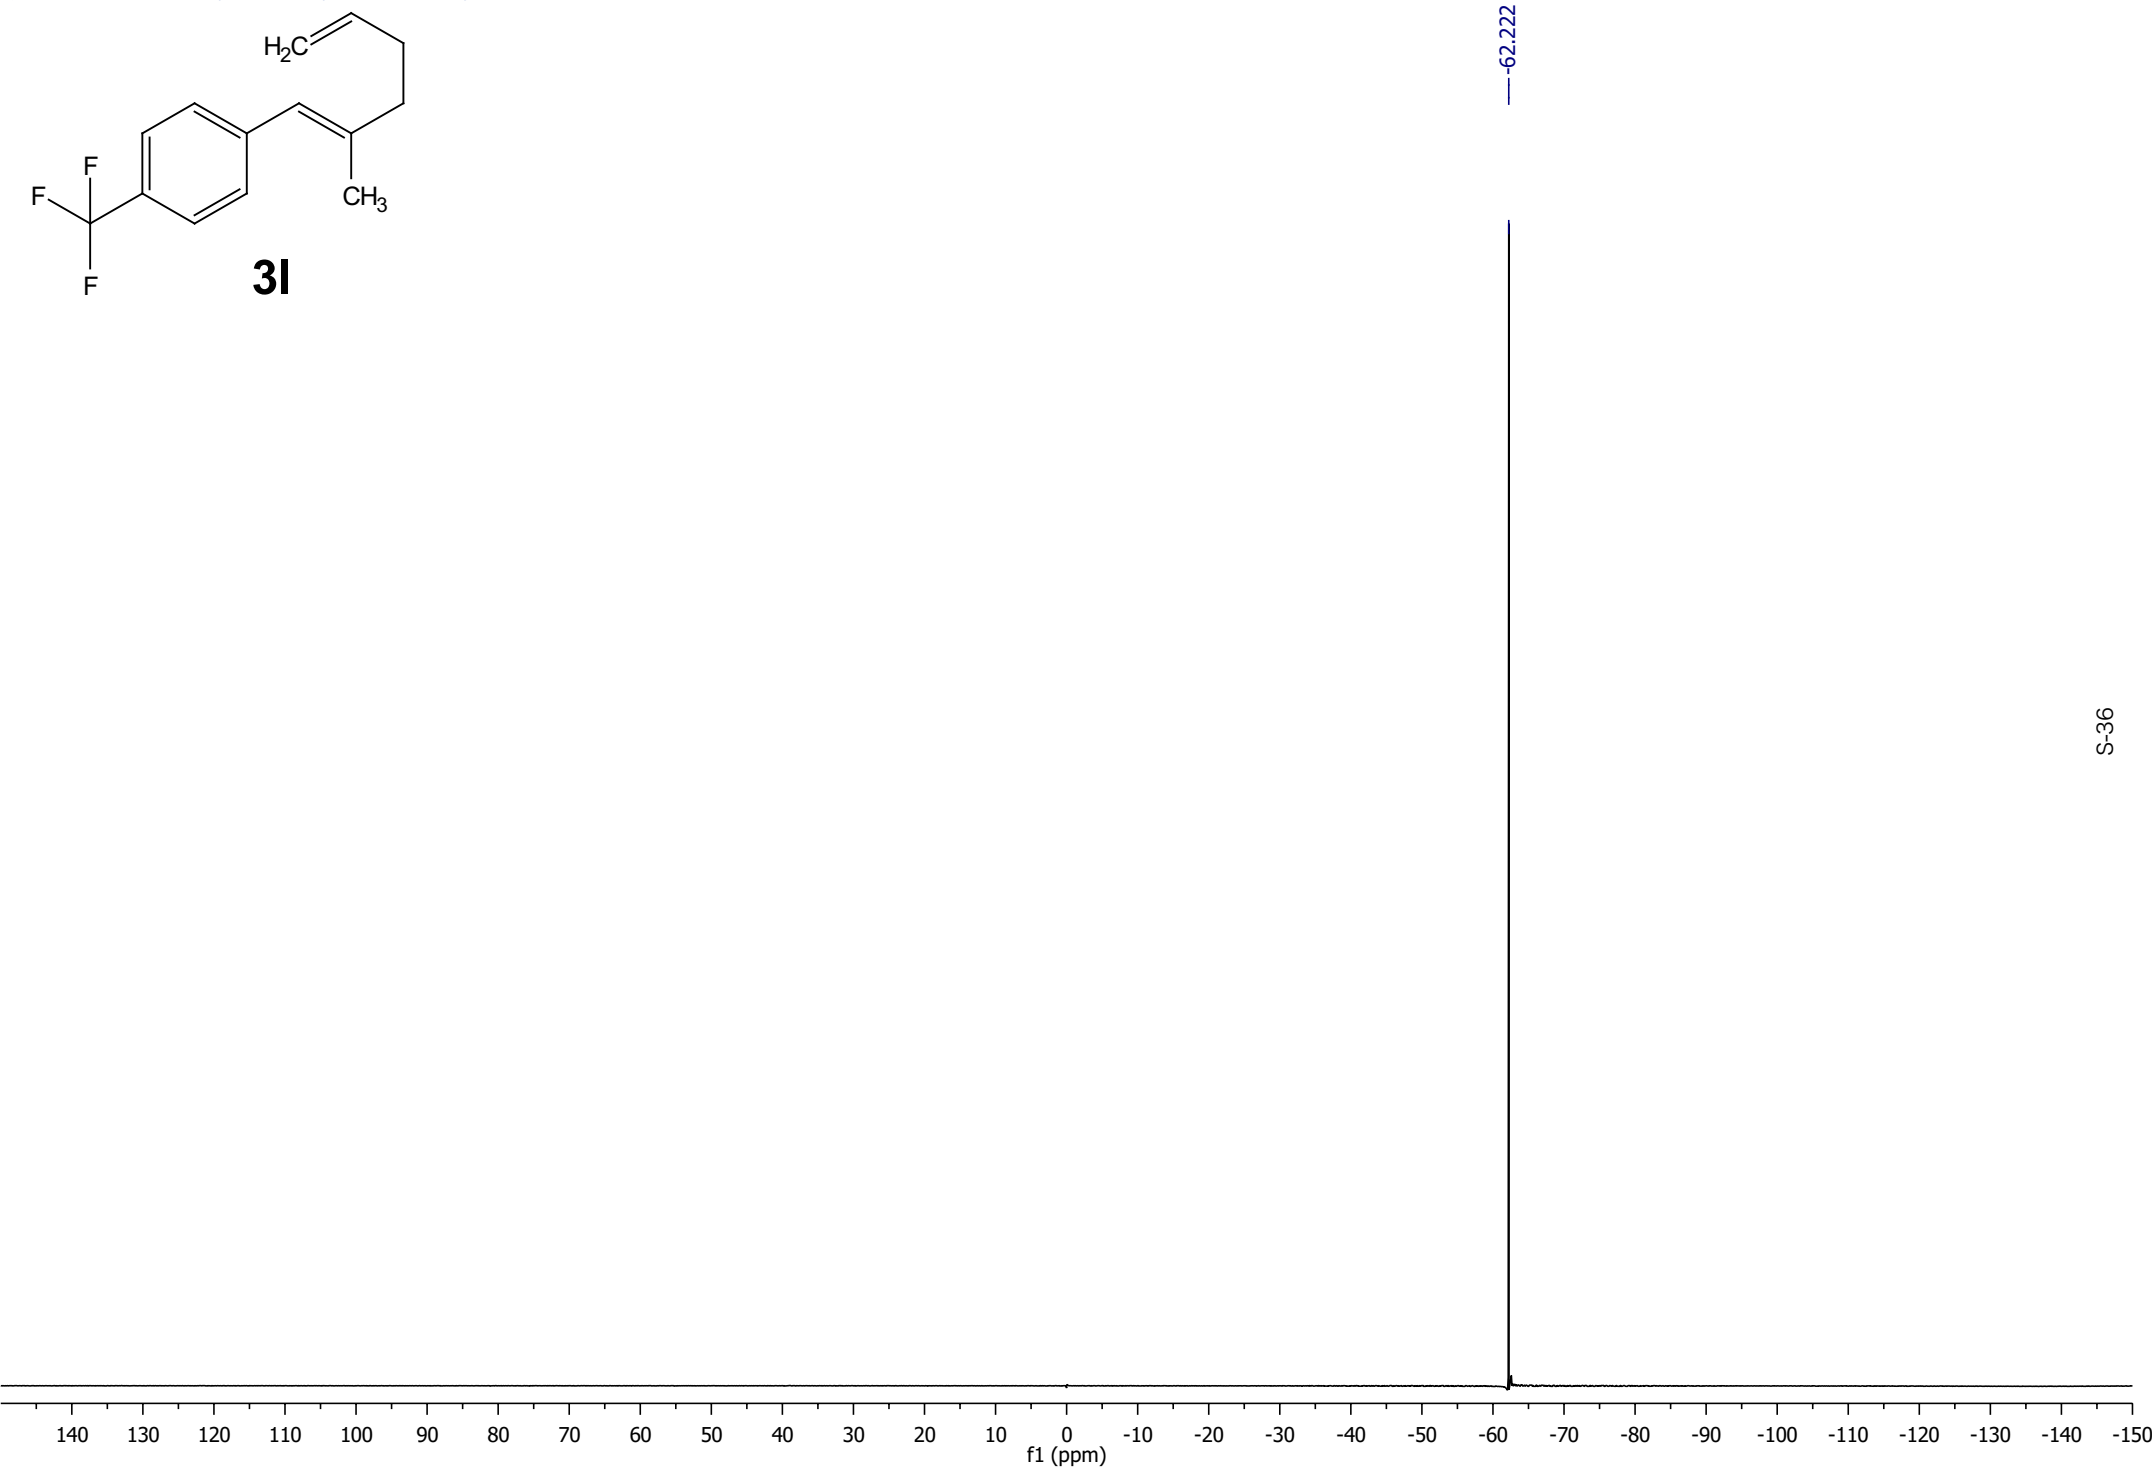

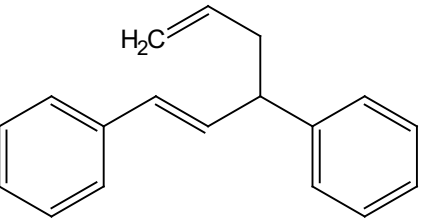

**3m**

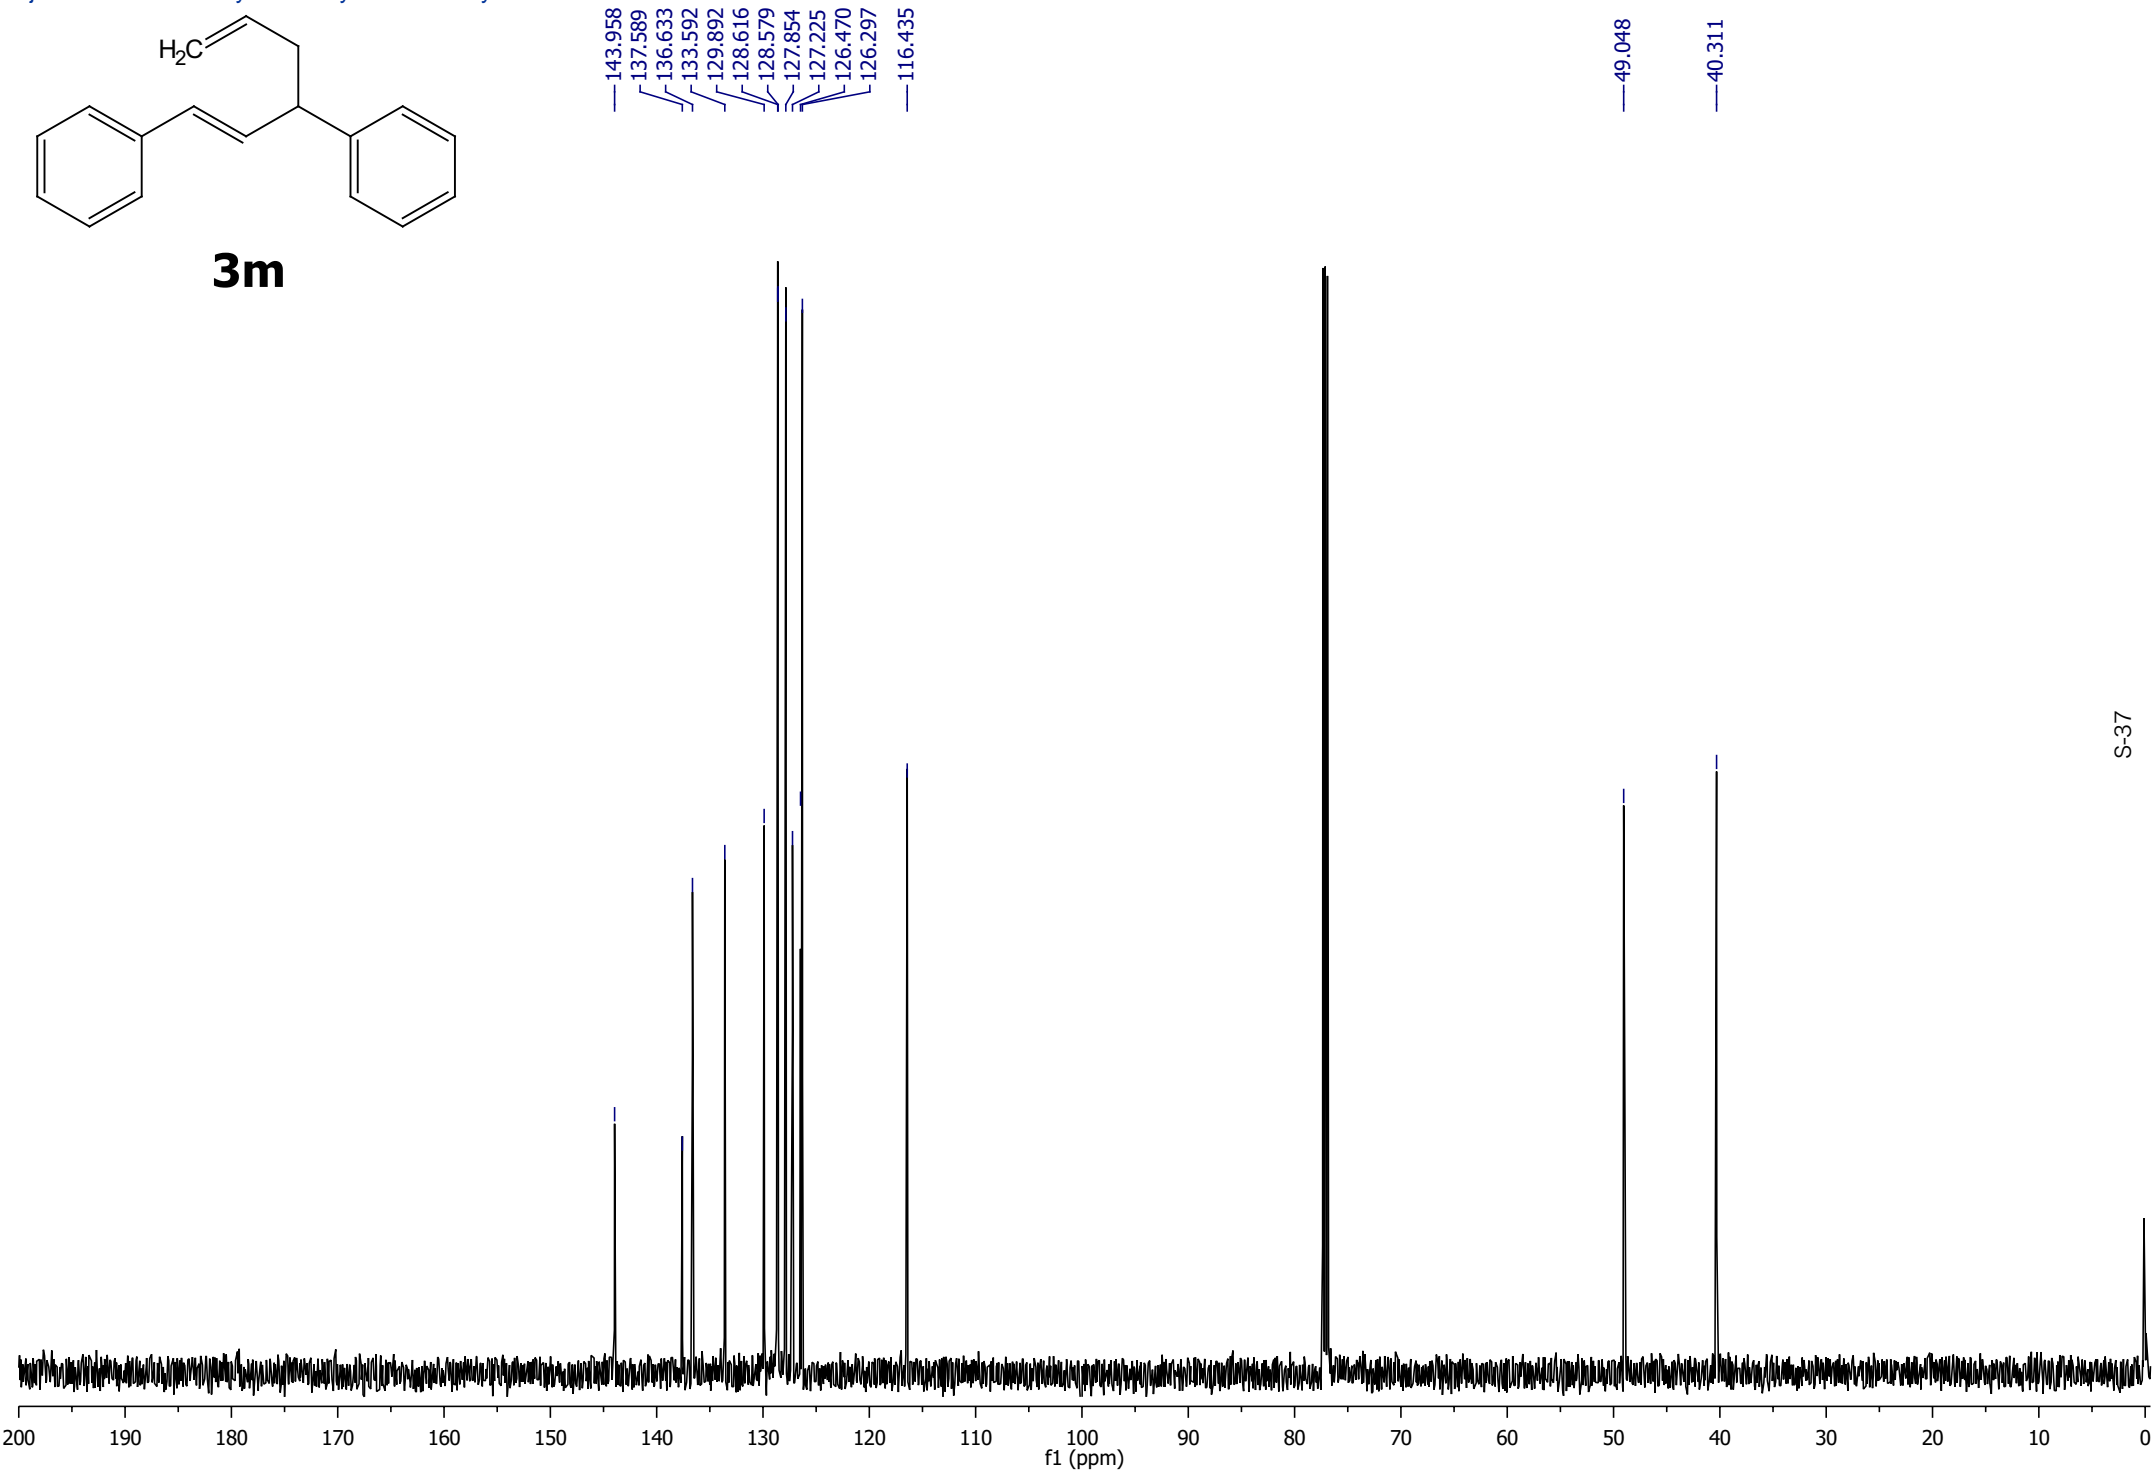

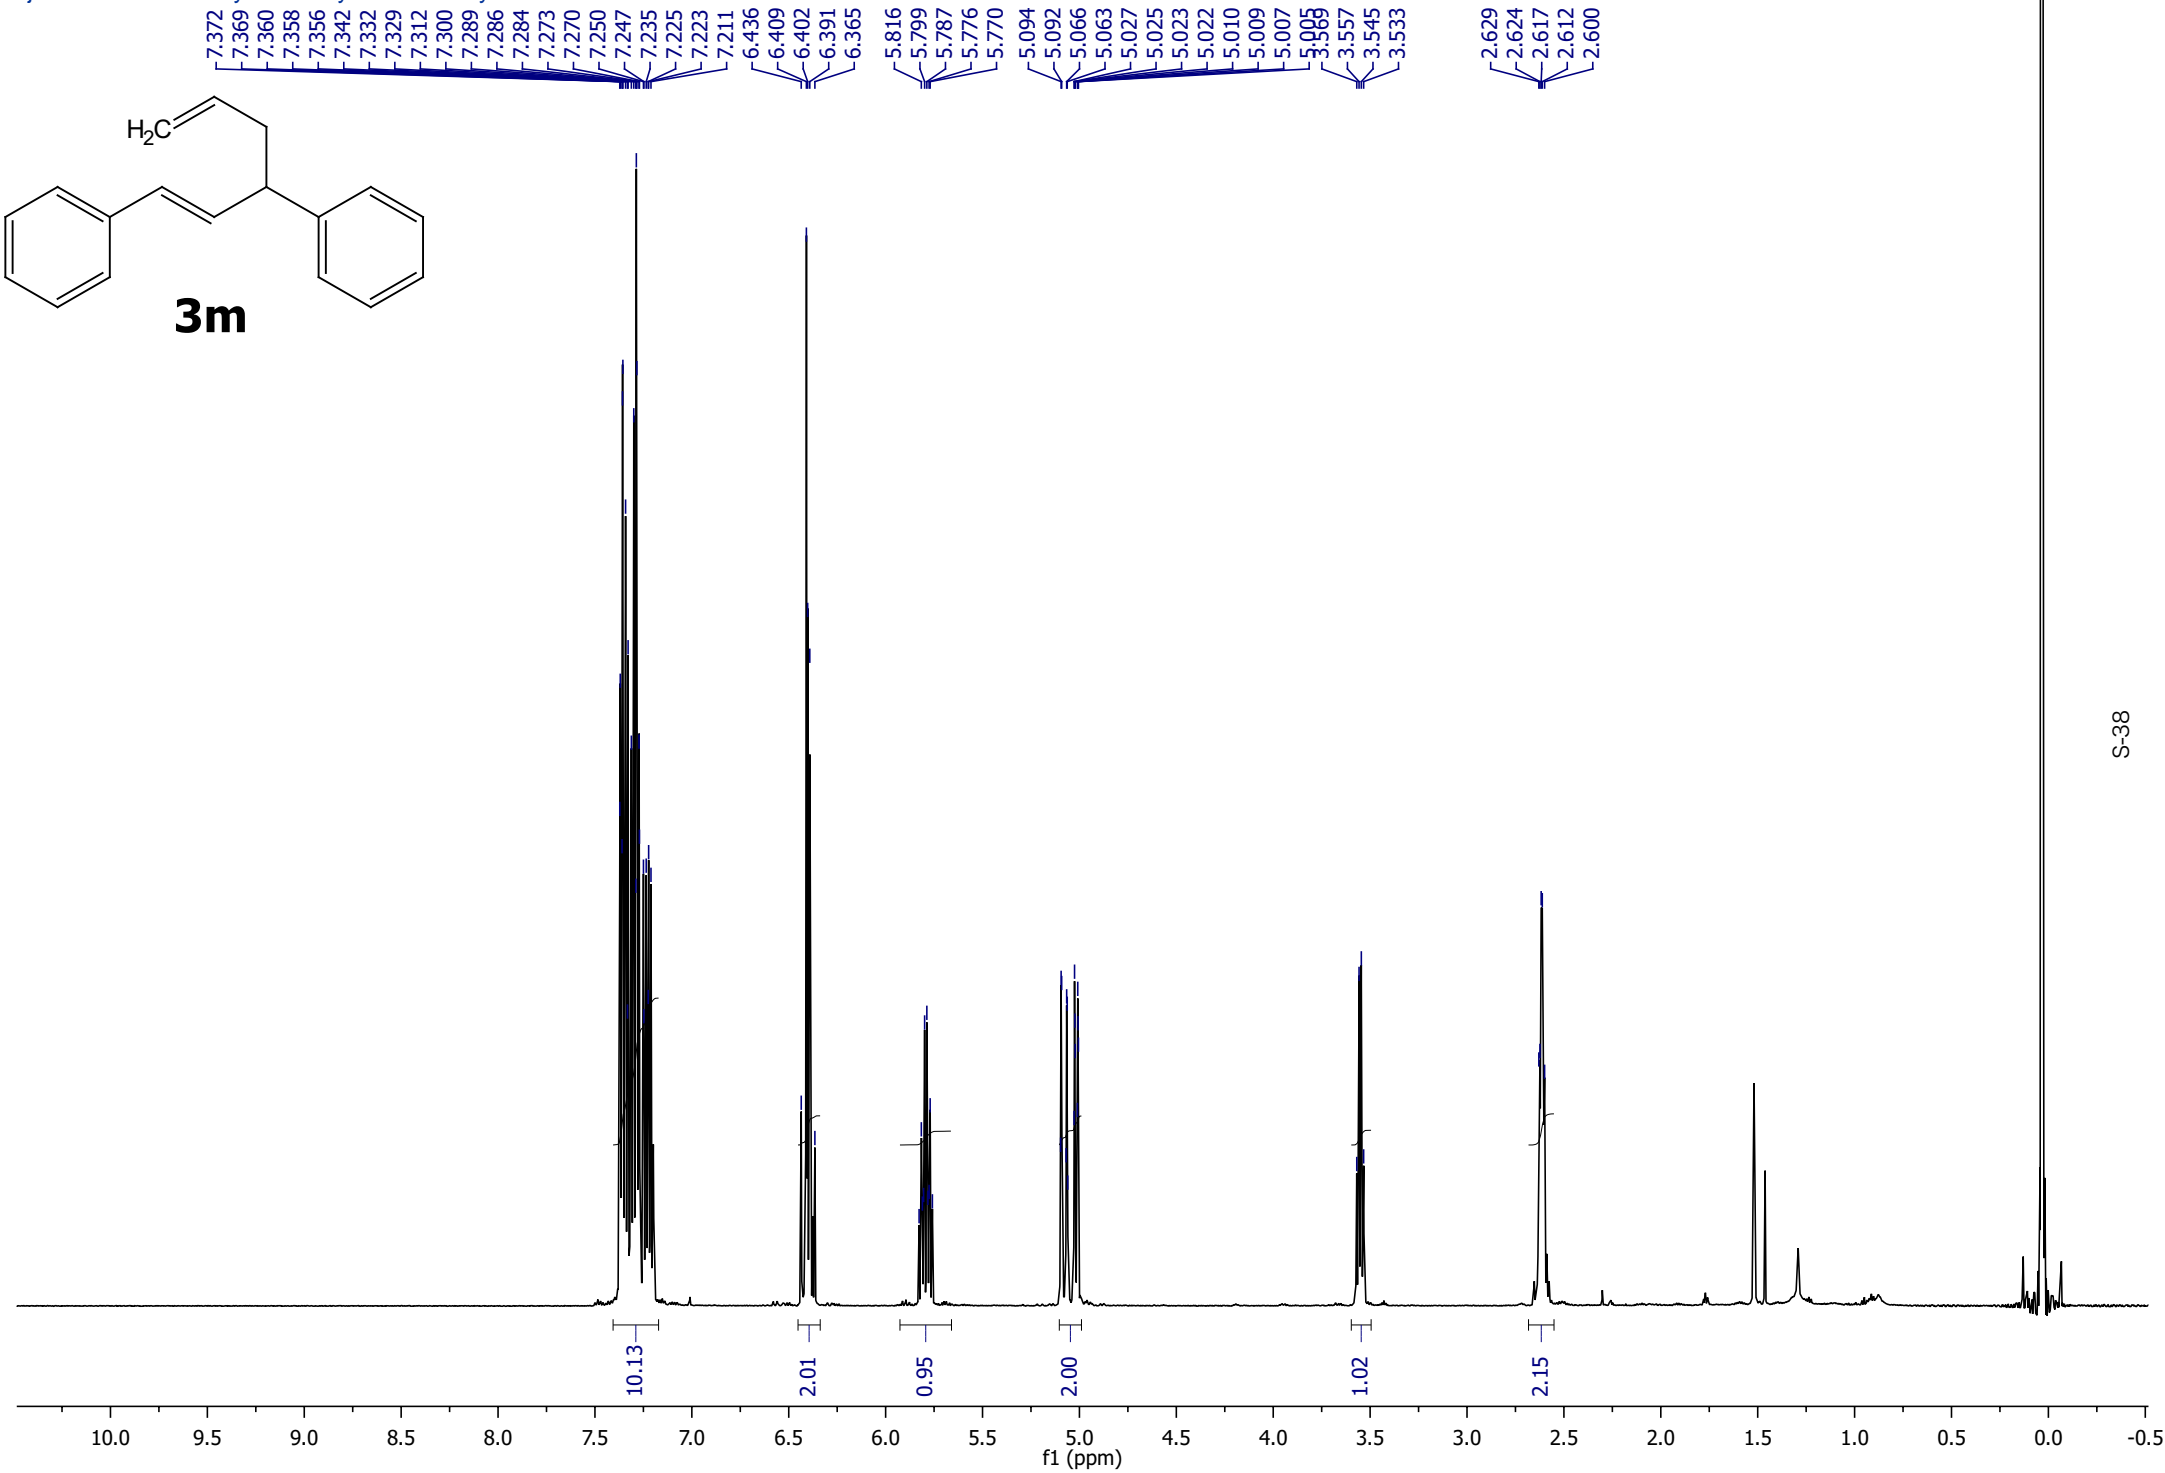

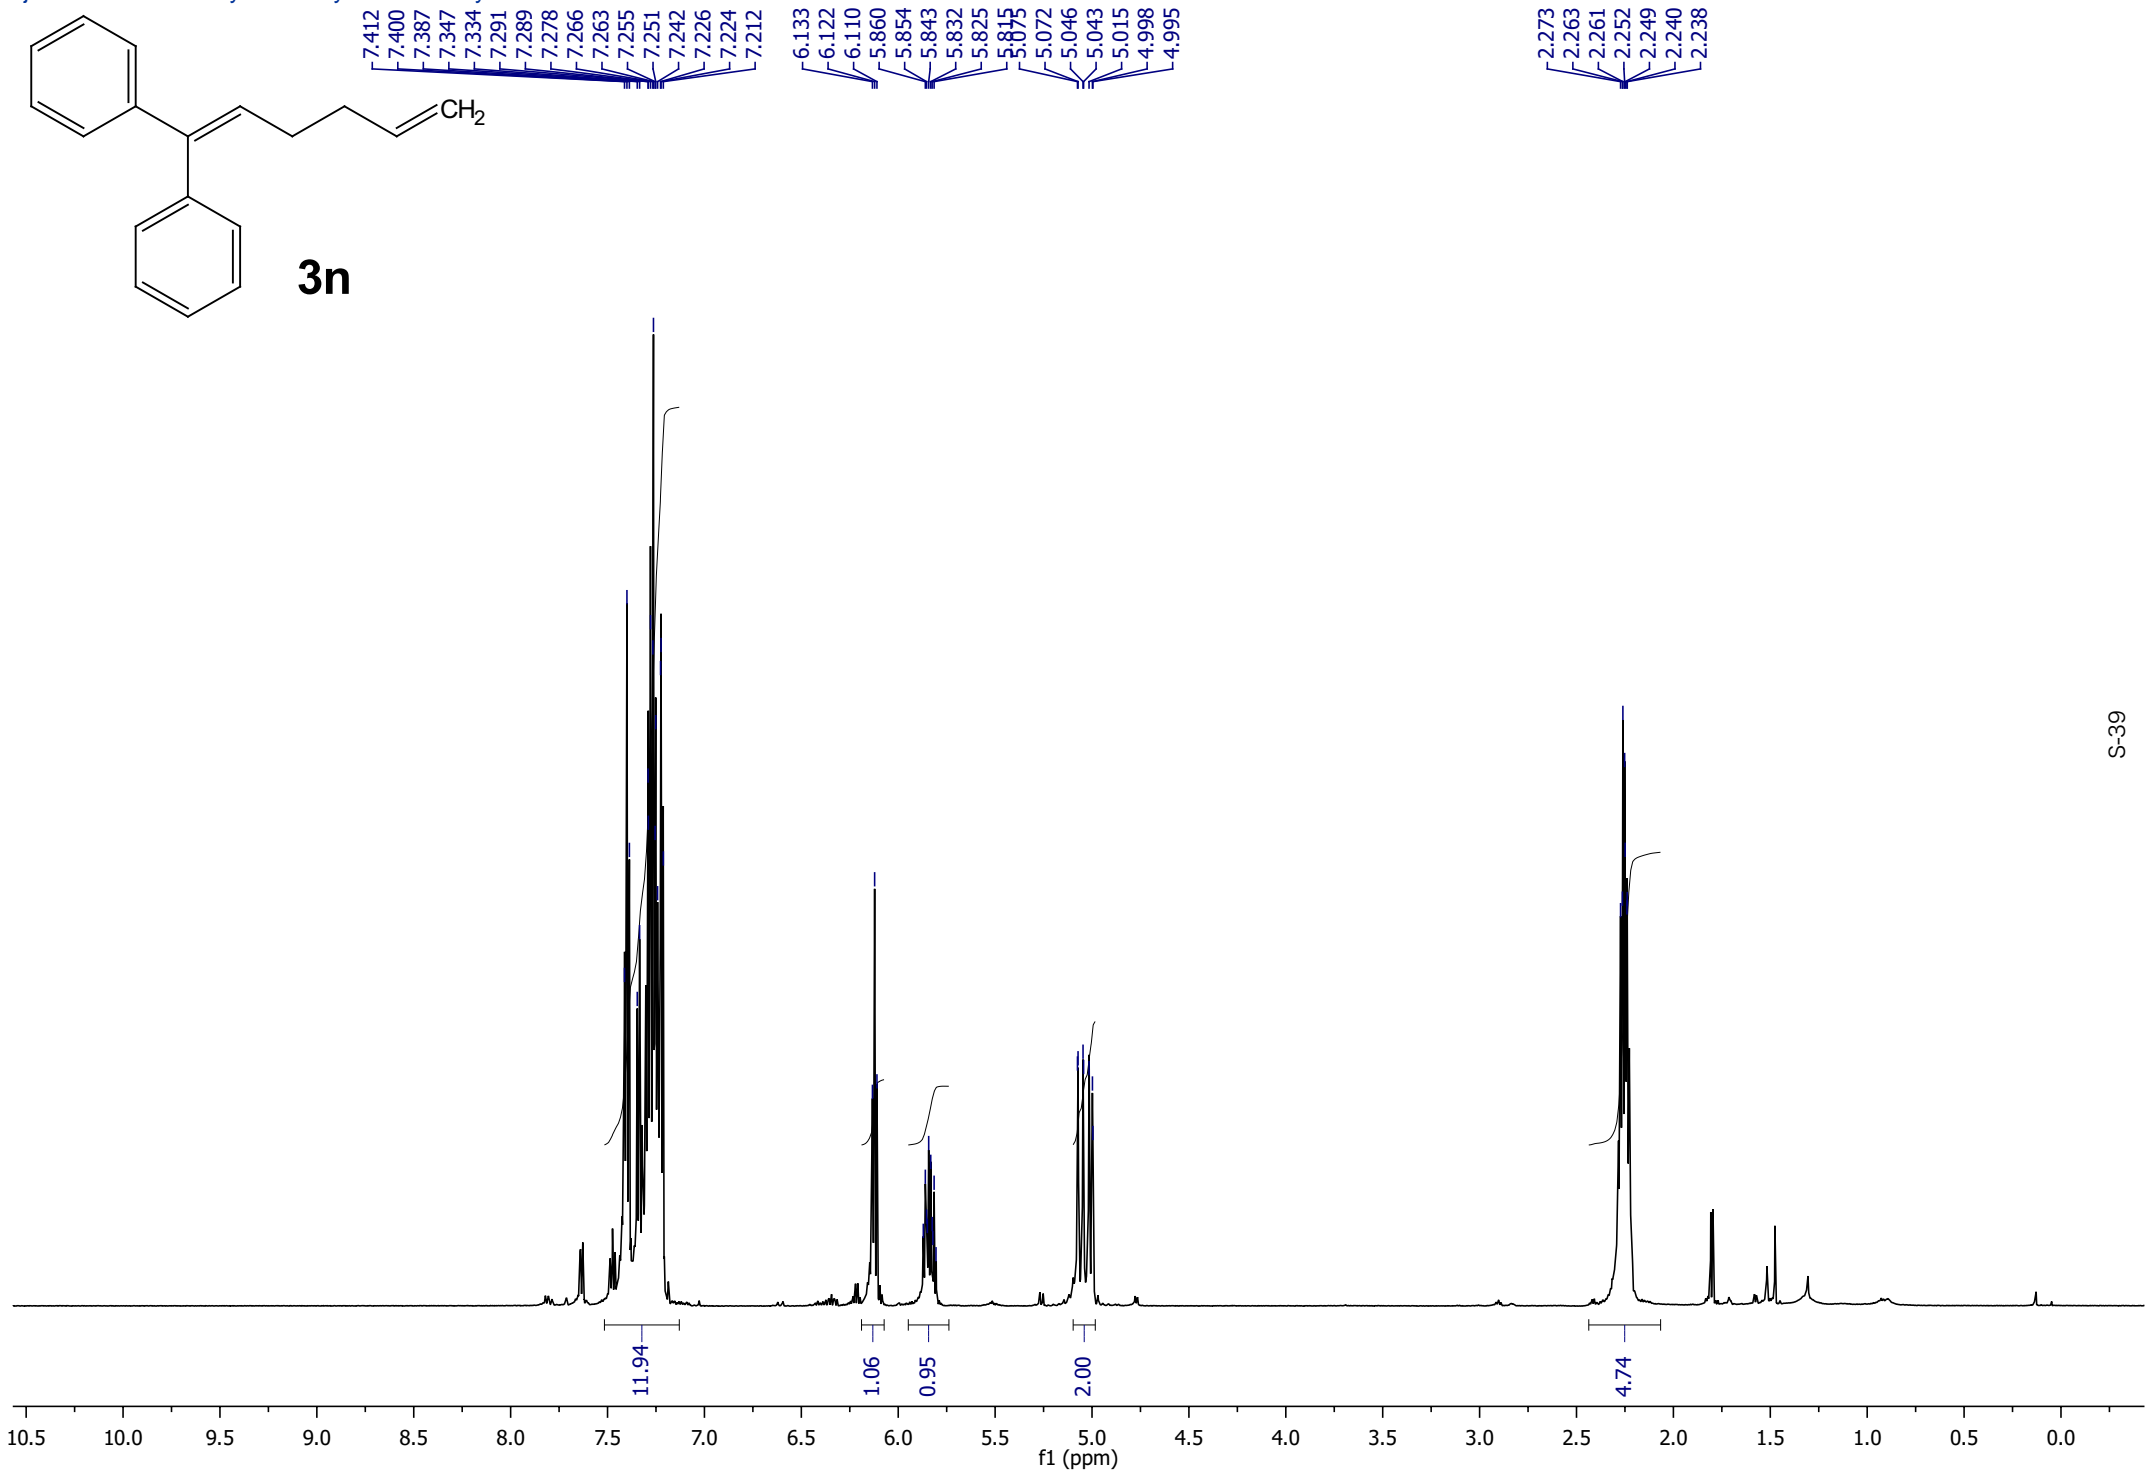

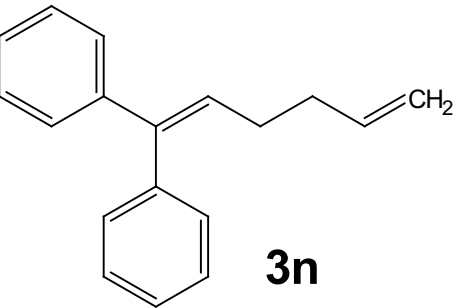

142.910  
142.081  
140.315  
138.236  
130.043  
129.311  
128.288  
128.202  
127.386  
127.036  
126.983  
115.073

34.176  
29.265

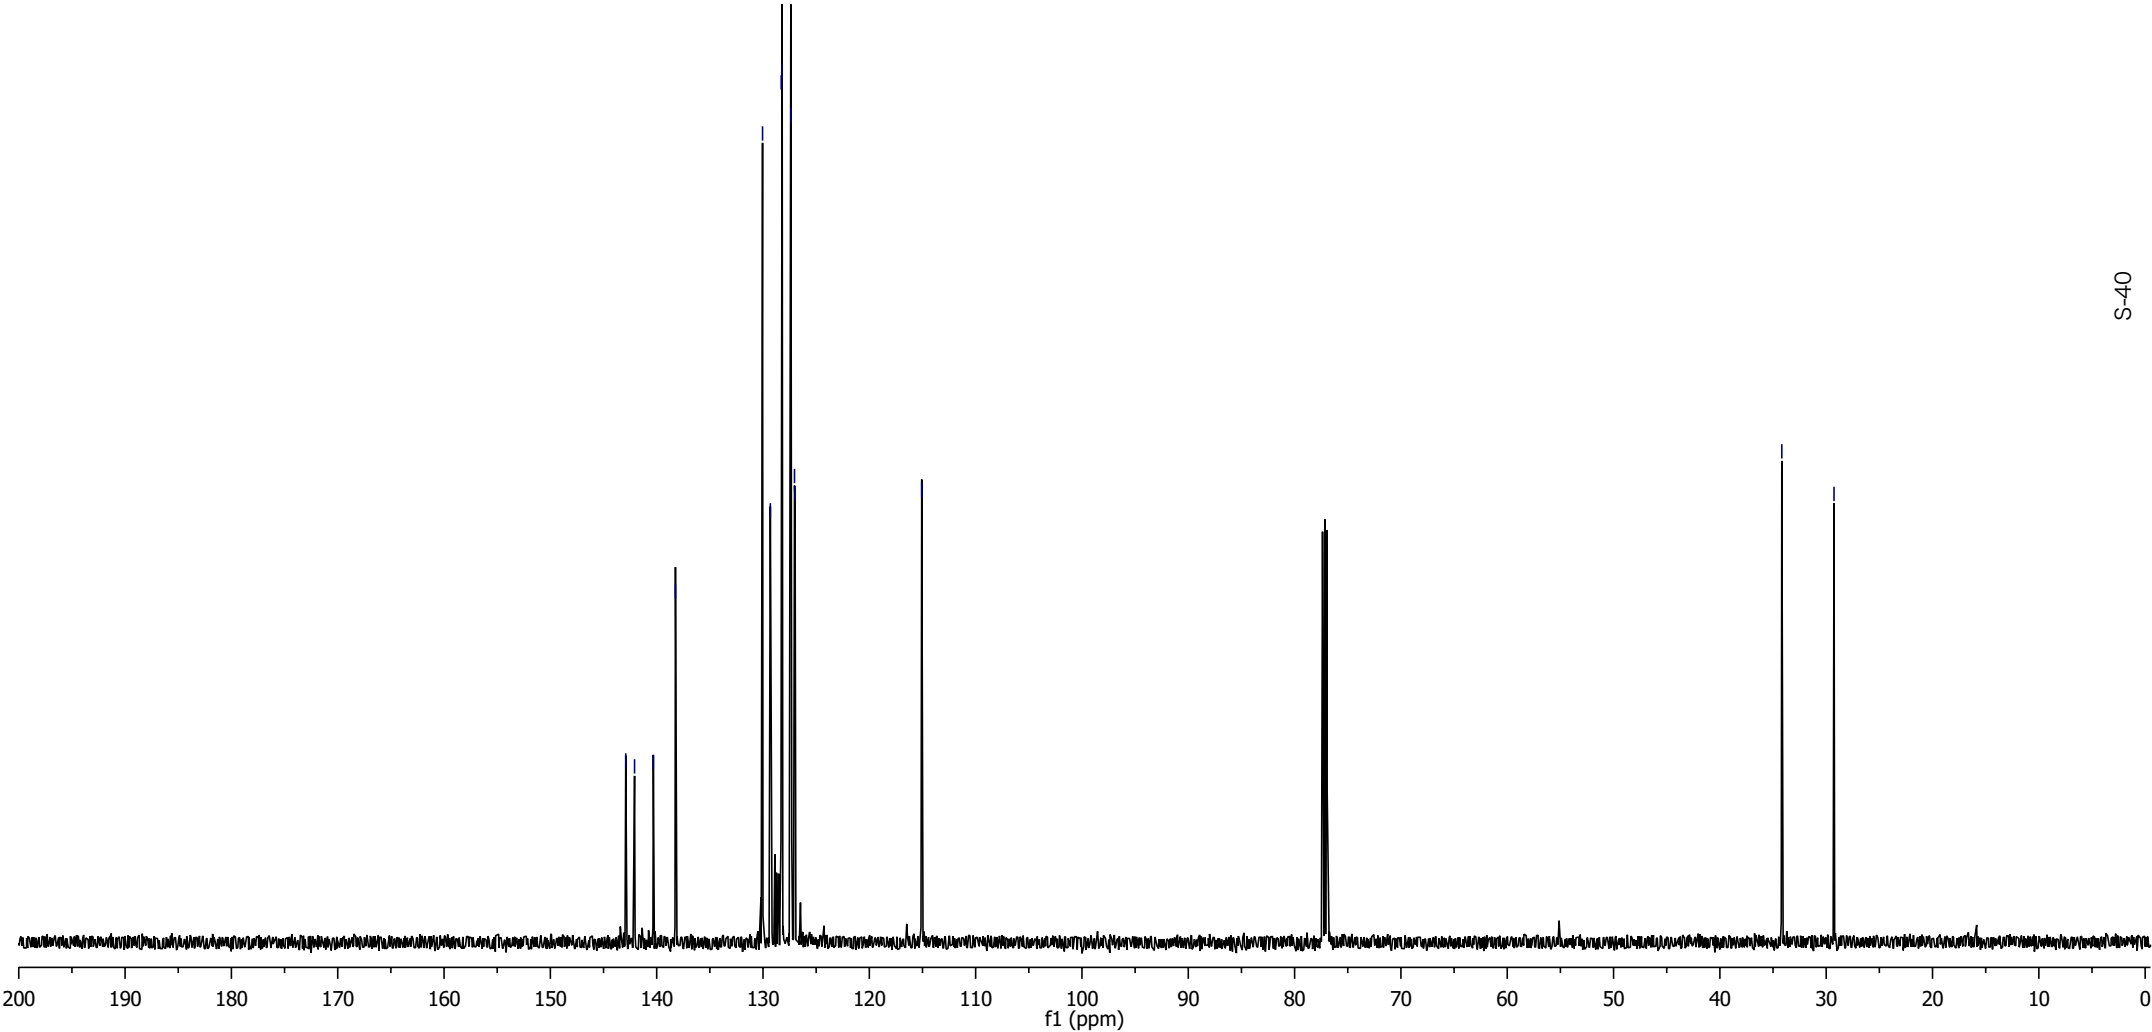



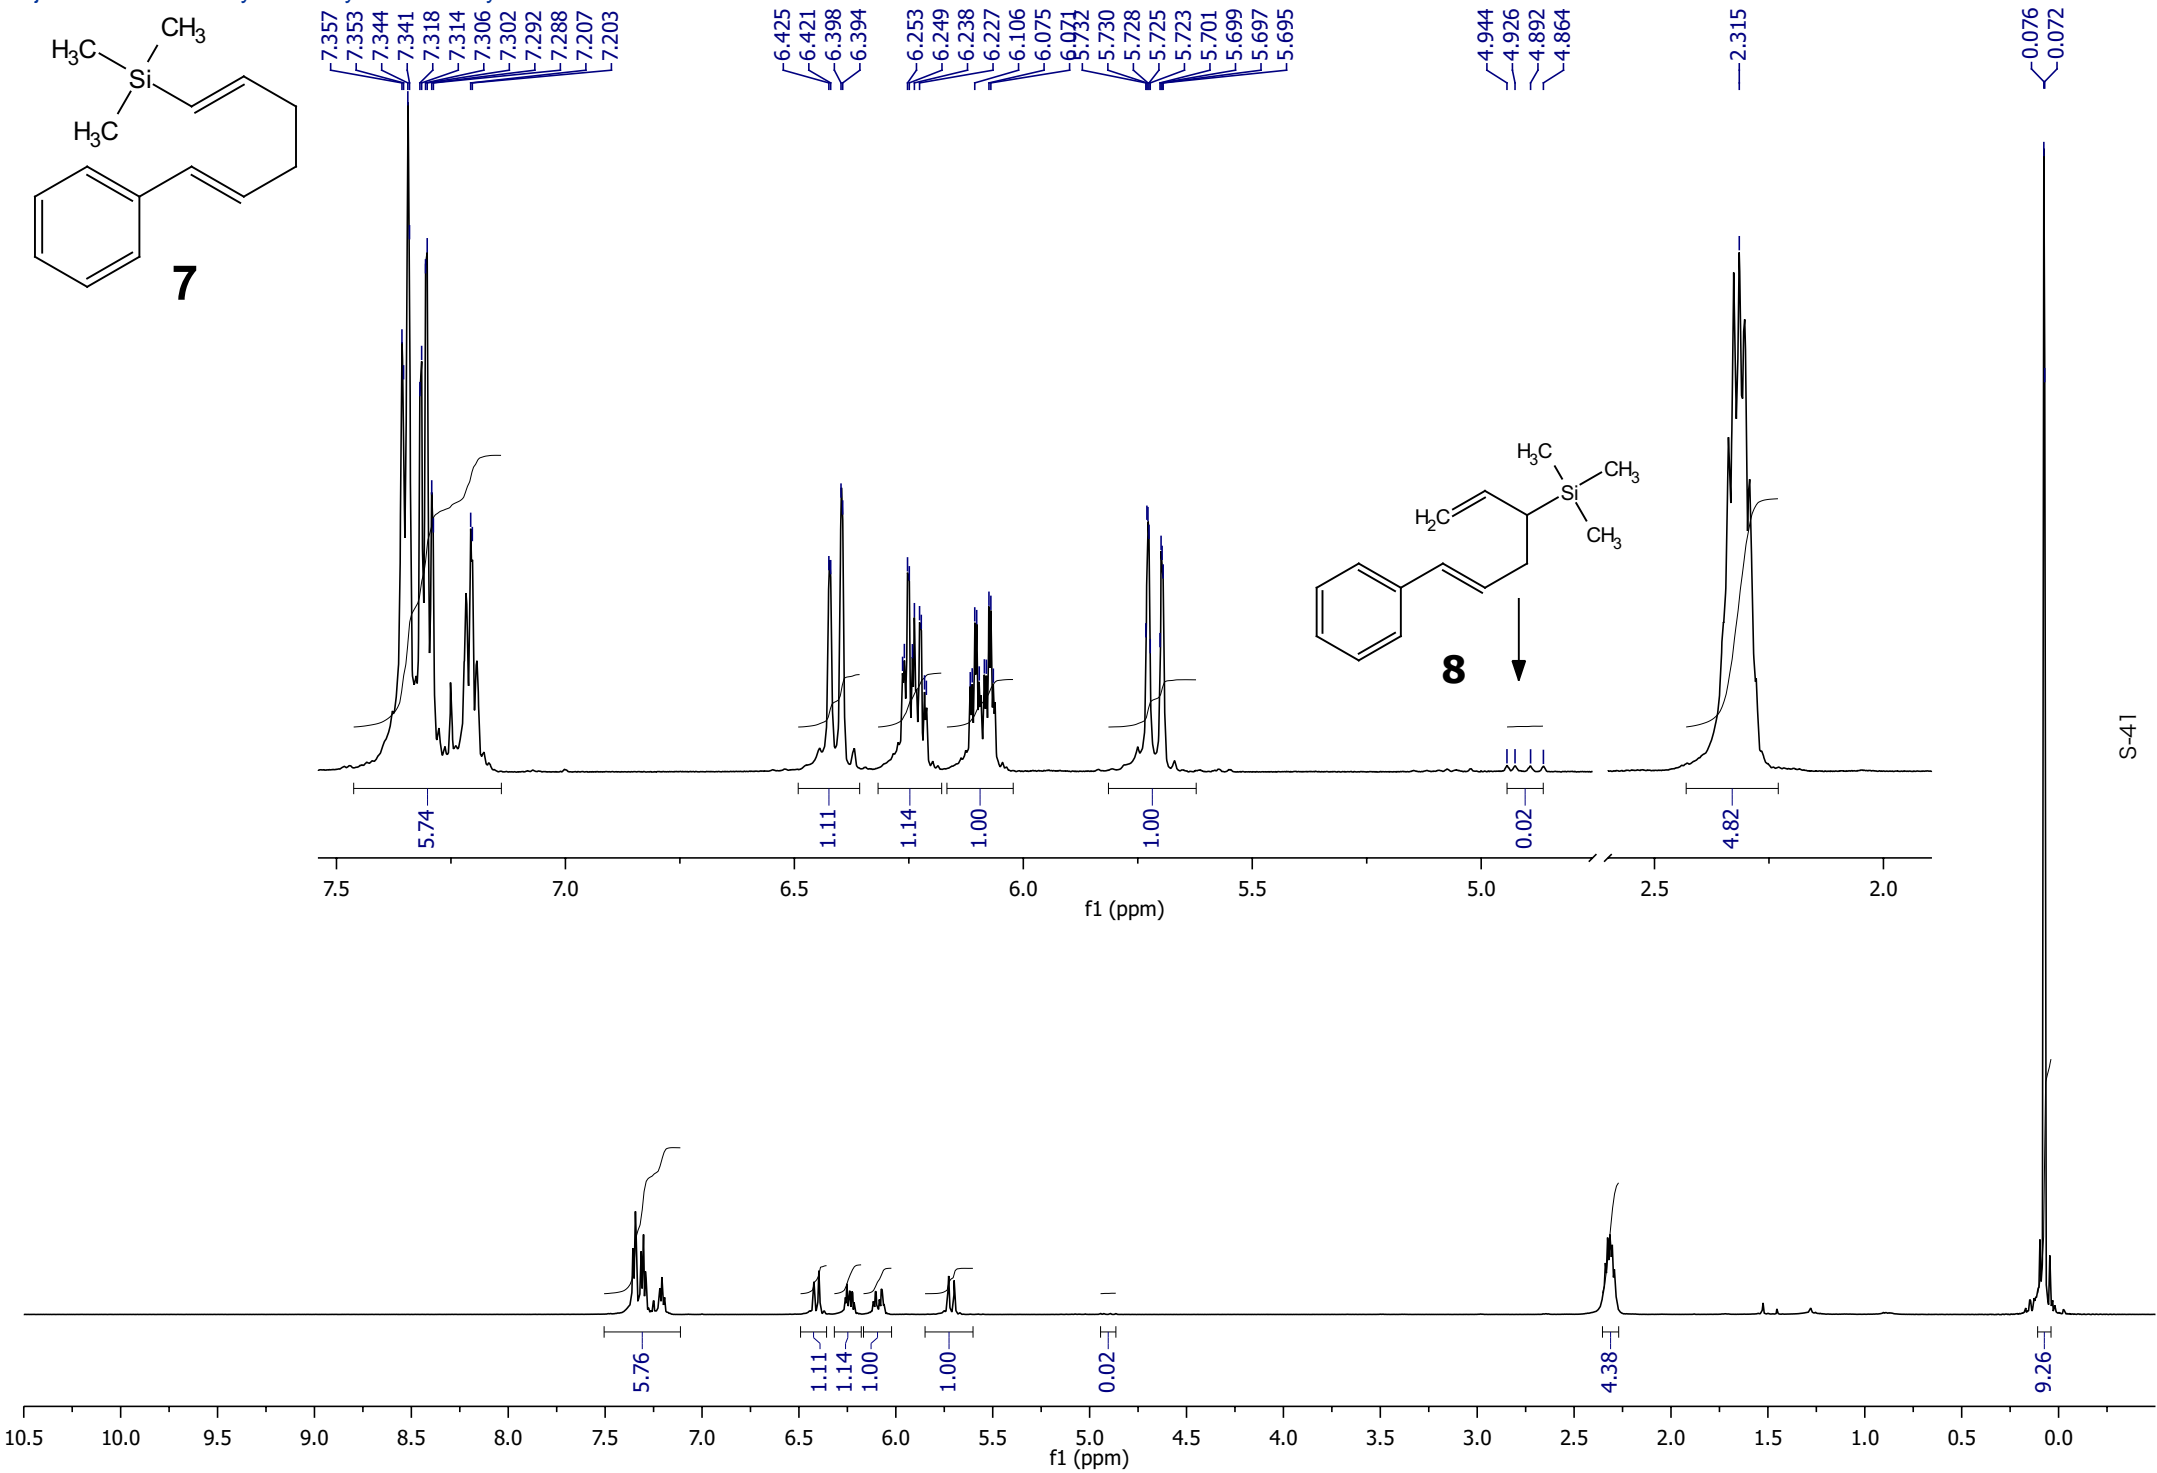

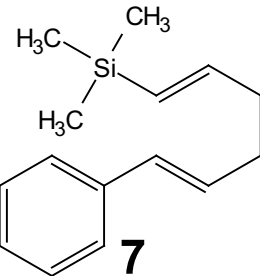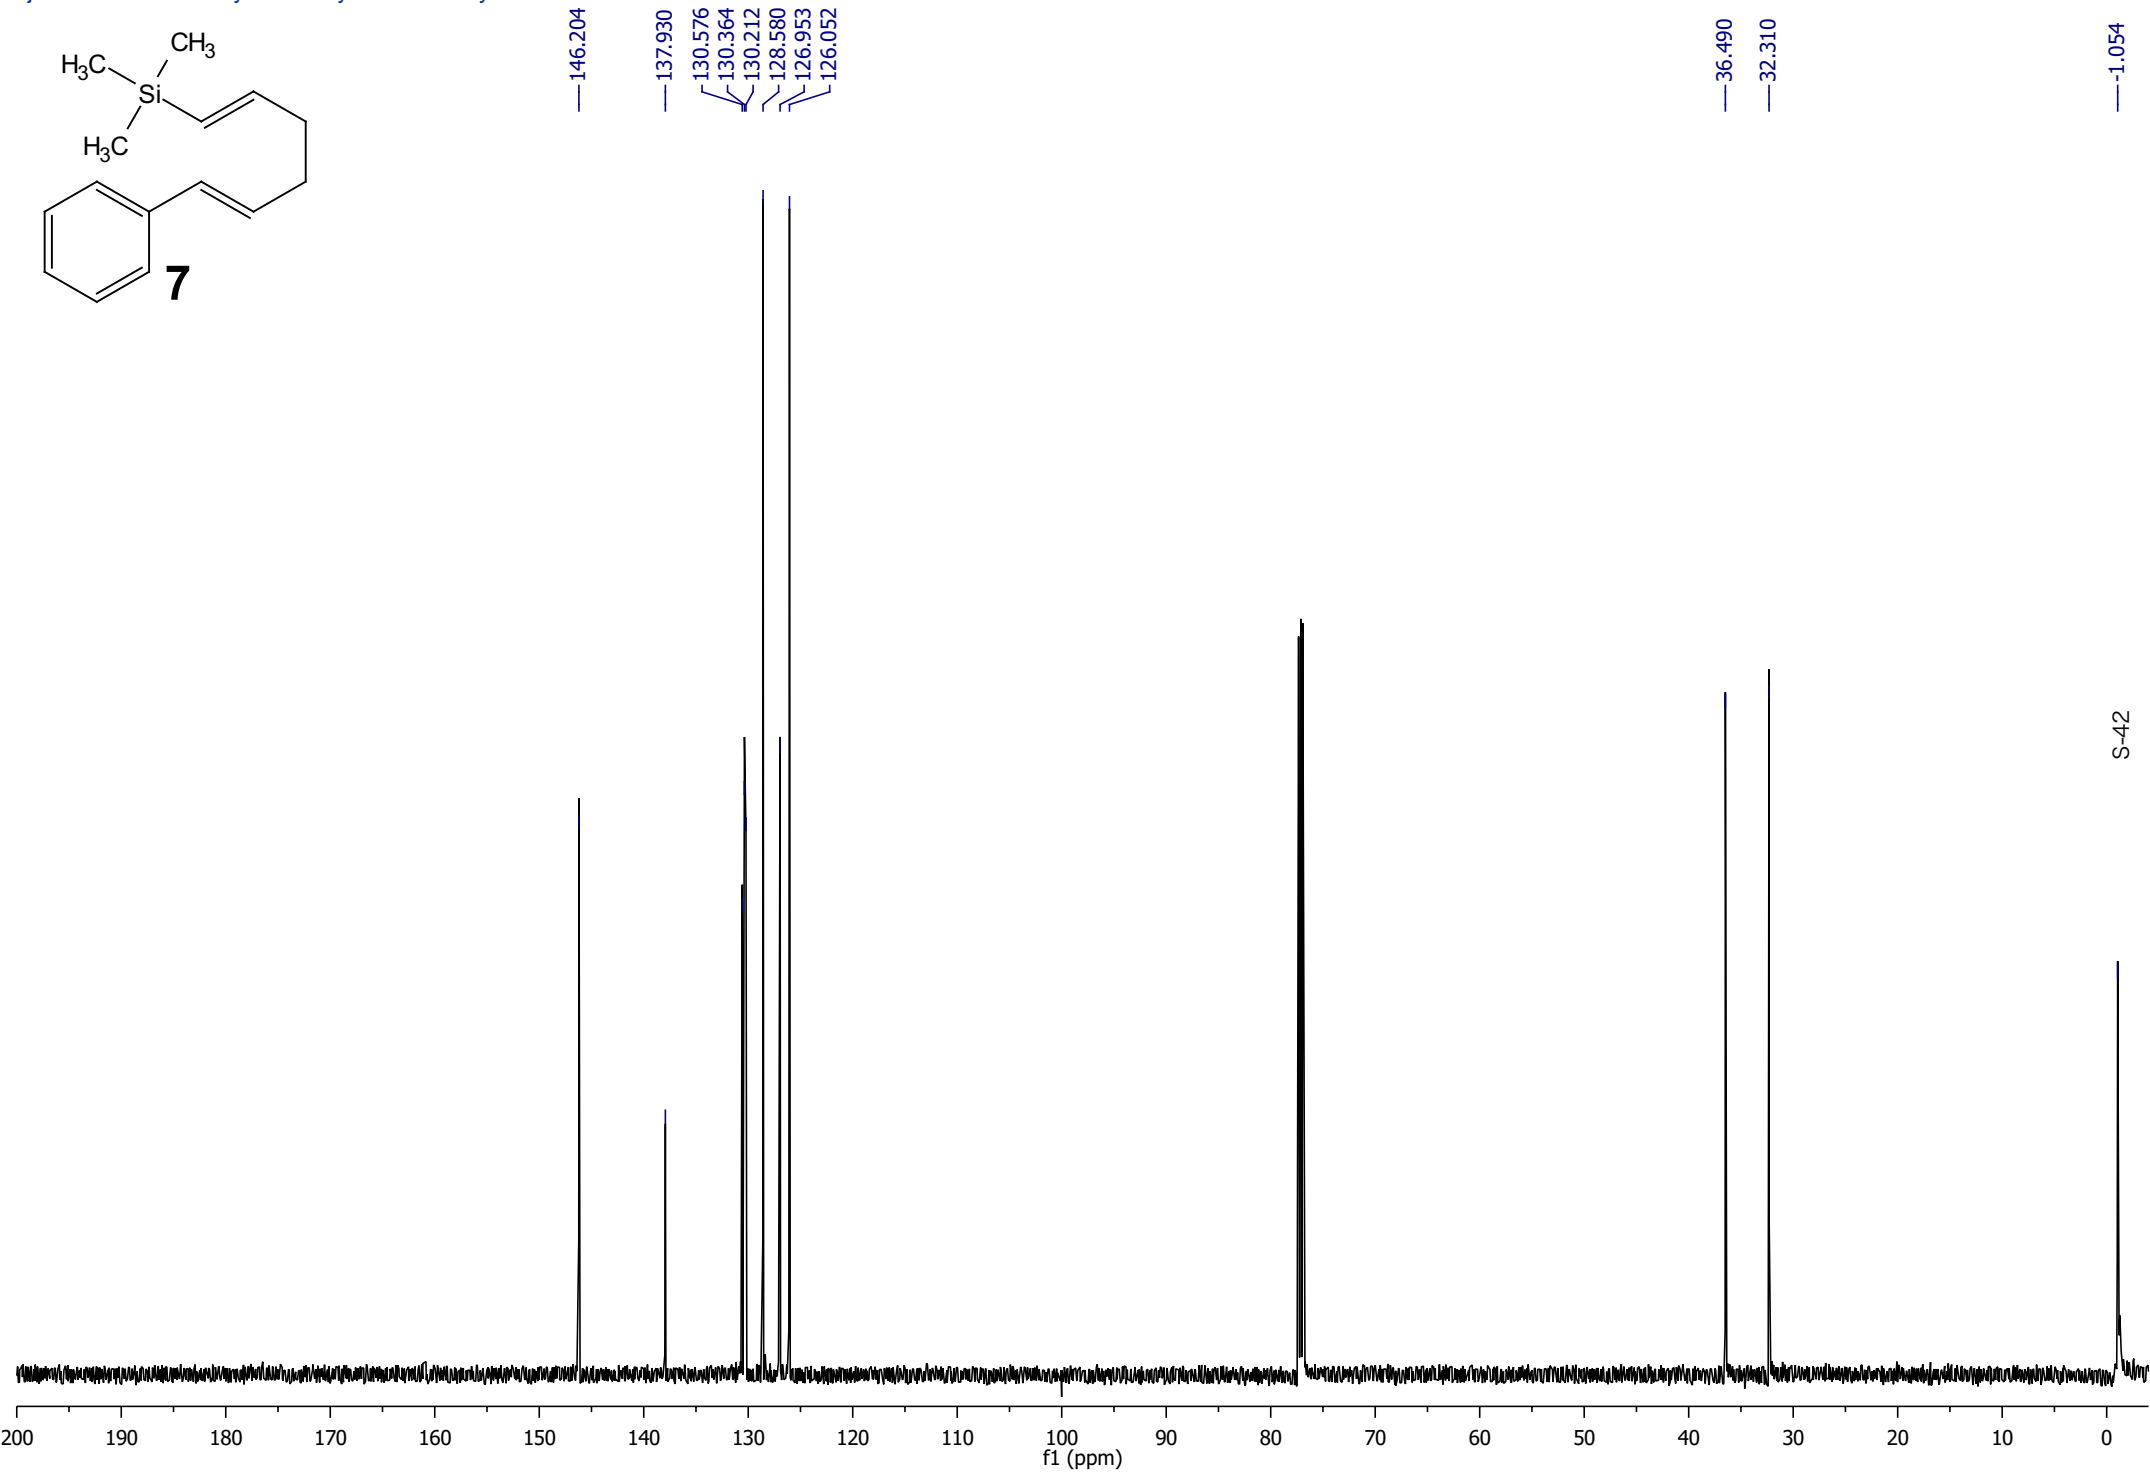

Supplement: c1cc13348a.pdf [file c1cc13348a.pdf]
